# Supplementary material for: Sarcoeleganolides C–G, Five New Cembranes from the South China Sea Soft Coral Sarcophyton elegans
Source: MDPI journal article supplement (doi:10.3390/md20090574), 2022-09-10
Supplement: s1 [file s1]

# Supporting Information for Original article

## Sarcoelegantolides C–G, Five New Cembranes from the South China Sea Soft Coral *Sarcophyton elegans*

Cili Wang <sup>1,2</sup>, Jiarui Zhang <sup>1,2</sup>, Xing Shi <sup>1,2</sup>, Kai Li <sup>1,2</sup>, Fengling Li <sup>3</sup>, Xuli Tang <sup>4</sup>, Guoqiang Li <sup>1,2,\*</sup> and Pinglin Li <sup>1,2,\*</sup>

<sup>1</sup> Key Laboratory of Marine Drugs, Chinese Ministry of Education, School of Medicine and Pharmacy, Ocean University of China, Qingdao 266003, China;

<sup>2</sup> Laboratory of Marine Drugs and Biological Products, National Laboratory for Marine Science and Technology, Qingdao 266235, China

<sup>3</sup> Biology Institute, Qilu University of Technology (Shandong Academy of Sciences), Jinan 250103, China;

<sup>4</sup> College of Chemistry and Chemical Engineering, Ocean University of China, Qingdao 266100, China;

\* Correspondence: liguoqiang@ouc.edu.cn (G.L.); lipinglin@ouc.edu.cn (P.L.); Tel.: +86-532-8203-2323 (G.L.); +86-532-8203-3054 (P.L.)

**Abstract:** Five new cembranes, named sarcoelegantolides C–G (1–5), along with three known analogs (6–8) were isolated from soft coral *Sarcophyton elegans* collected from the Yagong Island, South China Sea. Their structures and absolute configurations were determined by extensive spectroscopic analysis, QM-NMR and TDDFT-ECD calculations. In addition, compound **3** exhibited better anti-inflammation activity compared with the indomethacin as positive control in zebrafish at 20  $\mu$ M.

**Keywords:** *Sarcophyton elegans*; sarcoelegantolides C–G; cembranes; anti-inflammation activity

### Table

|                                                                               |    |
|-------------------------------------------------------------------------------|----|
| 1.NMR data of 1–5.                                                            | 2  |
| 2.The Determination of Relative and Absolute Configurations for Compounds 1–5 | 4  |
| 2.1 Conformational search                                                     | 4  |
| 2.2 Quantum chemical NMR calculation                                          | 4  |
| 2.3 Elucidation of absolute configurations by TDDFT-ECD                       | 7  |
| 3.Anti-inflammation assay of 1–5                                              | 8  |
| 4.Computational Details                                                       | 8  |
| 5.The 1D and 2D NMR spectra of 1–5                                            | 33 |

# 1. NMR data of 1–5.

**Table S1.** <sup>1</sup>H and <sup>13</sup>C NMR Data of sarcoelegantolide C (1).

| Position | <b>1<sup>a</sup></b> |                        |              |                                     |                         |              |
|----------|----------------------|------------------------|--------------|-------------------------------------|-------------------------|--------------|
|          | type                 | $\delta H^b$ (J in Hz) | $\delta C^c$ | <sup>1</sup> H- <sup>1</sup> H COSY | HMBC                    | NOESY/1D-NOE |
| 1        | qC                   |                        | 160.7        |                                     |                         |              |
| 2        | CH                   | 4.94, m                | 79.1         | H-3                                 |                         | H-18         |
| 3        | CH                   | 2.77, d, (4.2)         | 61.5         | H-2                                 | C-2                     |              |
| 4        | qC                   |                        | 61.5         |                                     |                         |              |
| 5a       | CH <sub>2</sub>      | 1.37, m                | 38.8         | H-6a,H-6b                           | C-4, C-6, C-7, C-18     |              |
| 5b       |                      | 2.08, m                |              | H-6a,H-6b                           |                         |              |
| 6a       | CH <sub>2</sub>      | 2.20, m                | 23.7         | H-5a,H-5b,H-7                       |                         |              |
| 6b       |                      | 2.08, m                |              | H-5a,H-5b,H-7                       |                         |              |
| 7        | CH                   | 5.05, t, (7.2)         | 124.3        | H-6a,H-6b                           | C-6,C-9,C-19            |              |
| 8        | qC                   |                        | 135.2        |                                     |                         |              |
| 9a       | CH <sub>2</sub>      | 2.11, m                | 38.8         | H-10a,H-10b                         | C-8,C-11,C-19           |              |
| 9b       |                      | 2.18, m                |              | H-10a,H-10b                         |                         |              |
| 10a      | CH <sub>2</sub>      | 2.26, m                | 24.4         | H-9a,H-9b,H-11                      | C-9,C-11,C-12           |              |
| 10b      |                      | 2.20, m                |              | H-9a,H-9b,H-11                      |                         |              |
| 11       | CH                   | 5.09, t, (6.6)         | 126.4        | H-10a,H-10b                         | C-10,C-13,C-20          |              |
| 12       | qC                   |                        | 133.6        |                                     |                         |              |
| 13a      | CH <sub>2</sub>      | 2.04, m                | 36.6         | H-14a,H-14b                         | C-1,C-11,C-12,C-20,C-14 |              |
| 13b      |                      | 2.45, m                |              | H-14a,H-14b                         |                         |              |
| 14a      | CH <sub>2</sub>      | 2.74, m                | 24.9         | H-13a,H-13b                         | C-1,C-2,C-12,C-13,C-15  |              |
| 14b      |                      | 2.39, m                |              | H-13a,H-13b                         |                         |              |
| 15       | qC                   |                        | 124.0        |                                     |                         |              |
| 16       | qC                   |                        | 174.4        |                                     |                         |              |
| 17       | CH <sub>3</sub>      | 1.83, s                | 8.8          |                                     | C-1,C-15,C-16           |              |
| 18       | CH <sub>3</sub>      | 1.53, s                | 17.9         |                                     | C-3,C-4,C-5             |              |
| 19       | CH <sub>3</sub>      | 1.58, s                | 16.1         |                                     | C-7,C-8,C-9             | H-6a         |
| 20       | CH <sub>3</sub>      | 1.68, s                | 17.0         |                                     | C-11,C-12,C-13          | H-10a        |

<sup>a</sup> In chloroform -d<sub>4</sub>. <sup>b</sup> Recorded at 600 MHz. <sup>c</sup> Recorded at 150 MHz.

**Table S2.** <sup>1</sup>H and <sup>13</sup>C NMR Data of sarcoelegantolides D (2).

| Position | <b>2<sup>a</sup></b> |                        |              |                                     |                      |                   |
|----------|----------------------|------------------------|--------------|-------------------------------------|----------------------|-------------------|
|          | type                 | $\delta H^b$ (J in Hz) | $\delta C^c$ | <sup>1</sup> H- <sup>1</sup> H COSY | HMBC                 | NOESY             |
| 1        | qC                   |                        | 158.3        |                                     |                      |                   |
| 2        | qC                   |                        | 108.3        |                                     |                      | H <sub>2</sub> -5 |
| 3        | CH                   | 5.16, s                | 120.6        |                                     | C-2,C-5,C-18         |                   |
| 4        | qC                   |                        | 143.8        |                                     |                      |                   |
| 5a       | CH <sub>2</sub>      | 2.20, m                | 40.2         | H-6a,H-6b                           | C-4,C-3,C-18,C-6,C-7 |                   |
| 5b       |                      | 2.20, m                |              | H-6a,H-6b                           |                      |                   |
| 6a       | CH <sub>2</sub>      | 2.35, m                | 24.6         | H-5a,H-5b,H-7                       | C-4,C-5,C-7,C-8      |                   |
| 6b       |                      | 2.14, m                |              | H-5a,H-5b,H-7                       |                      |                   |
| 7        | CH                   | 5.02, t, (6.6)         | 125.7        | H-6a,H-6b                           | C-5,C-6,C-9,C-19     |                   |
| 8        | qC                   |                        | 134.3        |                                     |                      |                   |
| 9a       | CH <sub>2</sub>      | 2.29, m                | 37.0         | H-10a,H-10b                         | C-7, C-8,C-11        |                   |
| 9b       |                      | 2.03, m                |              | H-10a,H-10b                         |                      |                   |
| 10a      | CH <sub>2</sub>      | 2.06, m                | 24.2         | H-9a,H-9b,H-11                      | C-8,C-11,C-12        |                   |
| 10b      |                      | 1.34, m                |              | H-9a,H-9b,H-11                      |                      |                   |
| 11       | CH                   | 2.69, dd, (9.6, 3.3)   | 61.5         | H-10a,H-10b                         | C-10                 | H-13a             |
| 12       | qC                   |                        | 61.6         |                                     |                      |                   |
| 13a      | CH <sub>2</sub>      | 1.68, m                | 34.0         | H-14a,H-14b                         | C-11,C-12,C-20       |                   |
| 13b      |                      | 1.89, m                |              | H-14a,H-14b                         |                      |                   |
| 14a      | CH <sub>2</sub>      | 2.45, m                | 23.4         | H-13a,H-13b                         | C-1,C-2,C-13,C-15    |                   |
| 14b      |                      | 2.14, m                |              | H-13a,H-13b                         |                      |                   |
| 15       | qC                   |                        | 126.4        |                                     |                      |                   |
| 16       | qC                   |                        | 172.2        |                                     |                      |                   |
| 17       | CH <sub>3</sub>      | 1.90, s                | 8.8          |                                     | C-1,C-15,C-16        |                   |

|    |                 |         |      |                |       |
|----|-----------------|---------|------|----------------|-------|
| 18 | CH <sub>3</sub> | 1.57, s | 15.9 | C-3,C-4,C-5    |       |
| 19 | CH <sub>3</sub> | 1.66, s | 15.0 | C-7,C-8,C-9    | H-6a  |
| 20 | CH <sub>3</sub> | 1.29, s | 16.6 | C-11,C-12,C-13 | H-13b |
| 21 | CH <sub>3</sub> | 3.14, s | 50.2 | C-2            | H-13a |

<sup>a</sup> In chloroform -d<sub>4</sub>. <sup>b</sup>Recorded at 600 MHz. <sup>c</sup> Recorded at 150 MHz.

**Table S3.** <sup>1</sup>H and <sup>13</sup>C NMR Data of sarcoelegantolide E (3).

| Position | 3 <sup>a</sup>   |                        |              |                                     |                        |          |
|----------|------------------|------------------------|--------------|-------------------------------------|------------------------|----------|
|          | type             | $\delta H^b$ (J in Hz) | $\delta C^c$ | <sup>1</sup> H- <sup>1</sup> H COSY | HMBC                   | NOESY    |
| 1        | qC               |                        | 160.0        |                                     |                        |          |
| 2        | CH               | 4.91, d, (10.0)        | 78.4         | H-3                                 |                        | H-18     |
| 3        | CH               | 4.74, d, (10.0)        | 125.3        | H-2                                 | C-2,C-5,C-18           | H-5a     |
| 4        | qC               |                        | 139.0        |                                     |                        |          |
| 5a       | CH <sub>2</sub>  | 2.38, dd, (10.0, 3.0)  | 46.2         | H-6                                 | C-3,C-4,C-6,C-7,C-18   | H-3,H-9a |
| 5b       |                  | 2.04, t, (11.5)        |              | H-6                                 | C-3,C-4,C-6,C-7,C-18   |          |
| 6        | CH               | 5.36, td, (10.0, 2.0)  | 71.1         | H-5a,H-5b,H-7                       |                        |          |
| 7        | CH               | 5.19, d, (10.0)        | 127.3        | H-6                                 | C-5,C-6,C-9,C-19       |          |
| 8        | qC               |                        | 141.9        |                                     |                        |          |
| 9a       | CH <sub>2</sub>  | 2.61, td, (14.0, 2.5)  | 29.1         | H-10a,H-10b                         | C-7,C-8,C-10,C-11,C-19 | H-2,H-11 |
| 9b       |                  | 1.76, m                |              | H-10a,H-10b                         |                        |          |
| 10a      | CH <sub>2</sub>  | 1.24, m                | 24.3         | H-9,H-9b,H-11                       |                        |          |
| 10b      |                  | 1.86, m                |              | H-9,H-9b,H-11                       | C-9,C-11,C-12          |          |
| 11       | CH               | 2.30, dd, (10.5, 2.5)  | 58.8         | H-10a,H-10b                         | C-10                   |          |
| 12       | qC               |                        | 59.9         |                                     |                        |          |
| 13a      | CH <sub>2</sub>  | 1.09, m                | 35.2         | H-14a,H-14b                         | C-14,C-20              | H-2,H-11 |
| 13b      |                  | 1.63, m                |              | H-14a,H-14b                         | C-14                   |          |
| 14a      | CH <sub>2</sub>  | 1.74, m                | 22.0         | H-13a,H-13b                         | C-1,C-13               |          |
| 14b      |                  | 1.59, m                |              | H-13a,H-13b                         | C-2,C-13               |          |
| 15       | qC               |                        | 124.0        |                                     |                        |          |
| 16       | qC               |                        | 173.9        |                                     |                        |          |
| 17       | CH <sub>3</sub>  | 1.61, s                | 8.8          |                                     | C-1,C-15,C-16          |          |
| 18       | CH <sub>3</sub>  | 1.34, s                | 18.3         |                                     | C-3,C-4,C-5            | H-5b     |
| 19       | CH <sub>3</sub>  | 1.46, s                | 22.4         |                                     | C-7,C-8,C-9            | H-7      |
| 20       | CH <sub>3</sub>  | 1.11, s                | 17.3         |                                     | C-11,C-12,C-13         | H-9a     |
| 21       | qC               |                        | 169.4        |                                     |                        |          |
| 22       | qCH <sub>3</sub> | 1.65, s                | 20.9         |                                     | C-21                   |          |

<sup>a</sup> In benzene -d<sub>6</sub>. <sup>b</sup>Recorded at 500 MHz. <sup>c</sup> Recorded at 125 MHz.

**Table S4.** <sup>1</sup>H and <sup>13</sup>C NMR Data of sarcoelegantolide F (4).

| Position | 4 <sup>a</sup>  |                        |              |                                     |                          |                    |
|----------|-----------------|------------------------|--------------|-------------------------------------|--------------------------|--------------------|
|          | type            | $\delta H^b$ (J in Hz) | $\delta C^c$ | <sup>1</sup> H- <sup>1</sup> H COSY | HMBC                     | NOESY              |
| 1        | qC              |                        | 151.9        |                                     |                          |                    |
| 2        | qC              |                        | 148.2        |                                     |                          |                    |
| 3        | CH              | 5.23, s                | 117.0        |                                     | C-1,C-2,C-4,C-5,C-18     | H <sub>2</sub> -14 |
| 4        | qC              |                        | 72.0         |                                     |                          |                    |
| 5a       | CH <sub>2</sub> | 2.16, m                | 48.5         | H-6                                 | C-3,C-4,C-6,C-7,C-18     | H-5a               |
| 5b       |                 | 2.03, m                |              | H-6                                 | C-3,C-6,C-7              |                    |
| 6        | CH              | 4.30, t, (9.0)         | 73.4         | H-5a,H-5b,H-7                       |                          |                    |
| 7        | CH              | 4.88, d, (9.0)         | 124.8        | H-6                                 | C-9,C-19                 |                    |
| 8        | qC              |                        | 141.1        |                                     |                          |                    |
| 9a       | CH <sub>2</sub> | 2.10, m                | 38.7         | H-10a,H-10b                         |                          | H <sub>2</sub> -13 |
| 9b       |                 | 2.10, m                |              | H-10a,H-10b                         |                          |                    |
| 10a      | CH <sub>2</sub> | 2.22, m                | 24.3         | H-9a,H-9b,H-11                      | C-11                     |                    |
| 10b      |                 | 2.10, m                |              | H-9a,H-9b,H-11                      |                          |                    |
| 11       | CH              | 4.86, d, (4.0)         | 125.9        | H-10a,H-10b                         |                          |                    |
| 12       | qC              |                        | 131.7        |                                     |                          |                    |
| 13a      | CH <sub>2</sub> | 2.33, m                | 36.2         | H-14a,H-14b                         | C-1,C-11,C-12,C-14,C-20  |                    |
| 13b      |                 | 2.33, m                |              | H-14a,H-14b                         | C-1,C-11,C-12,C-14,C-20  |                    |
| 14a      | CH <sub>2</sub> | 2.54, m                | 22.5         | H-13a,H-13b                         | C-1,C-2,,C-12,C-13,C-15, |                    |
| 14b      |                 | 2.54, m                |              | H-13a,H-13b                         | C-1,C-2,,C-12,C-13,C-15, |                    |

|    |                 |         |       |                |      |
|----|-----------------|---------|-------|----------------|------|
| 15 | qC              |         | 123.2 |                |      |
| 16 | qC              |         | 170.0 |                |      |
| 17 | CH <sub>3</sub> | 1.93, s | 9.3   | C-1,C-15,C-16  |      |
| 18 | CH <sub>3</sub> | 1.45, s | 32.9  | C-3,C-4,C-5    | H-5a |
| 19 | CH <sub>3</sub> | 1.66, s | 17.2  | C-7,C-8,C-9    | H-6  |
| 20 | CH <sub>3</sub> | 1.60, s | 17.1  | C-11,C-12,C-13 |      |
| 21 | CH <sub>3</sub> | 3.21, s | 55.1  | C-6            |      |

<sup>a</sup>In chloroform -d<sub>4</sub>. <sup>b</sup>Recorded at 500 MHz. <sup>c</sup>Recorded at 125 MHz.

**Table S5.** <sup>1</sup>H and <sup>13</sup>C NMR Data of sarcoeleganolide G (5).

| Position | 5 <sup>a</sup>  |                        |              |                                     |                     |                   |
|----------|-----------------|------------------------|--------------|-------------------------------------|---------------------|-------------------|
|          | type            | $\delta H^b$ (J in Hz) | $\delta C^c$ | <sup>1</sup> H- <sup>1</sup> H COSY | HMBC                | NOESY             |
| 1        | qC              |                        | 161.6        |                                     |                     |                   |
| 2        | CH              | 5.45, d, (10.5)        | 79.9         | H-3                                 | C-3                 | H-14a,<br>H-18    |
| 3        | CH              | 4.89, d, (10.5)        | 120.0        | H-2                                 | C-5,C-18            | H-5a              |
| 4        | qC              |                        | 144.7        |                                     |                     |                   |
| 5a       | CH <sub>2</sub> | 2.20, m                | 39.5         | H-6a,H-6b                           | C-6                 |                   |
| 5b       |                 | 2.32, m                |              | H-6a,H-6b                           |                     |                   |
| 6a       | CH <sub>2</sub> | 2.20, m                | 24.2         | H-5a,H-5b,H-7                       |                     |                   |
| 6b       |                 | 2.35, m                |              | H-5a,H-5b,H-7                       | C-4,C-7,C-8         |                   |
| 7        | CH              | 4.92, d, (5.0)         | 123.0        | H-6a,H-6b                           | C-5,C-19            | H <sub>2</sub> -9 |
| 8        | qC              |                        | 135.5        |                                     |                     |                   |
| 9a       | CH <sub>2</sub> | 2.03, m                | 33.9         | H-10a,H-10b                         | C-7,C-8,C-11        |                   |
| 9b       |                 | 2.03, m                |              | H-10a,H-10b                         | C-7,C-8,C-11        |                   |
| 10a      | CH <sub>2</sub> | 1.71, m                | 34.4         | H-9a,H-9b,H-11                      | C-8,C-9,C-11,C-12   |                   |
| 10b      |                 | 1.71, m                |              | H-9a,H-9b,H-11                      | C-8,C-9,C-11,C-12   |                   |
| 11       | CH              | 3.98, t, (6.5)         | 72.1         | H-10a,H-10b                         | C-10,C-12,C-13,C-20 | H-14a             |
| 12       | qC              |                        | 151.9        |                                     |                     |                   |
| 13a      | CH <sub>2</sub> | 2.24, m                | 32.1         | H-14a,H-14b                         | C-11,C-12,C-14,C-20 |                   |
| 13b      |                 | 2.17, m                |              | H-14a,H-14b                         | C-11,C-12,C-14,C-20 |                   |
| 14a      | CH <sub>2</sub> | 2.26, m                | 27.0         | H-13a,H-13b                         | C-1, C-2            |                   |
| 14b      |                 | 2.46, m                |              | H-13a,H-13b                         | C-2, C-13           |                   |
| 15       | qC              |                        | 124.2        |                                     |                     |                   |
| 16       | qC              |                        | 174.9        |                                     |                     |                   |
| 17       | CH <sub>3</sub> | 1.87, s                | 9.0          |                                     | C-1,C-15,C-16       |                   |
| 18       | CH <sub>3</sub> | 1.78, s                | 15.9         |                                     | C-3,C-4,C-5         |                   |
| 19       | CH <sub>3</sub> | 1.64, s                | 17.1         |                                     | C-7,C-8,C-9         |                   |
| 20a      | CH <sub>2</sub> | 5.19, s                | 110.9        |                                     | C-11,C-12,C-13      |                   |
| 20b      |                 | 5.02, s                |              |                                     |                     |                   |

<sup>a</sup>In chloroform -d<sub>4</sub>. <sup>b</sup>Recorded at 500 MHz. <sup>c</sup>Recorded at 125 MHz.

## 2. The Determination of Relative and Absolute Configurations for Compounds 1–5

### 2.1 Conformational search

Conformational search of all possible configurations were carried out by MacroModel integrated in Maestro V11.9 (Schrödinger Inc.)[30]. The OPLS3e force field[31] and an energy below a threshold of 10 kJ mol<sup>-1</sup> were employed[32]. Eliminating redundant conformer used root-mean-squared-distance (RMSD) cutoff of 0.5 Å and the maximum iterations was 2500. After energy minimization, the unstable configurations were excluded.

### 2.2 Quantum chemical NMR calculation

In order to establish the relative configuration of molecules **1**, **4**, <sup>13</sup>C NMR chemical shifts were calculated by

Gaussian 16 program package[33]. Excluding unstable conformers by conformational search, the remaining conformers were optimized with the density functional theory (DFT) at the B3LYP/6-31G (d, p) level[34], and all minima displayed no imaginary frequencies by vibrational frequency analysis at the same level. The populations of conformers were calculated according to the Boltzmann distribution theory and their relative Gibbs free energy. GIAO calculations of NMR shielding were accomplished for all stable conformations by DFT GIAO model at PCM/mPW1PW91/6-31+G\*\*[35] level for DP4<sup>+</sup> calculations. The qccNMR results were shown in the following Table S6-S7 and Figures S1-S4.

**Table S6.** Experimental NMR data and calculated NMR data for **1**.

| Nuclei   | SP <sup>2</sup> | Experiment 1 | Calculation                                  |                                              |
|----------|-----------------|--------------|----------------------------------------------|----------------------------------------------|
|          |                 |              | Conf.1 (2 <i>R</i> ,3 <i>S</i> ,4 <i>S</i> ) | Conf.1 (2 <i>S</i> ,3 <i>S</i> ,4 <i>R</i> ) |
| <b>C</b> | <b>X</b>        | 135.2        | 141.3                                        | 141.7                                        |
| C        |                 | 38.8         | 46.3                                         | 41.2                                         |
| C        |                 | 24.4         | 32.6                                         | 36.6                                         |
| C        | X               | 126.4        | 131.4                                        | 130.8                                        |
| C        |                 | 38.8         | 44.7                                         | 32.7                                         |
| C        |                 | 23.7         | 33.0                                         | 26.5                                         |
| C        | X               | 124.3        | 127.6                                        | 133.7                                        |
| C        |                 | 61.5         | 72.0                                         | 65.3                                         |
| C        |                 | 36.6         | 44.4                                         | 33.9                                         |
| C        |                 | 24.9         | 32.5                                         | 29.0                                         |
| C        | X               | 160.7        | 169.1                                        | 171.3                                        |
| C        |                 | 79.1         | 86.3                                         | 80.7                                         |
| C        |                 | 61.5         | 69.5                                         | 65.3                                         |
| C        | X               | 133.6        | 140.6                                        | 139.4                                        |
| C        |                 | 16.1         | 22.9                                         | 18.5                                         |
| C        | X               | 124.0        | 127.7                                        | 124.9                                        |
| C        | X               | 174.4        | 176.6                                        | 176.3                                        |
| C        |                 | 8.8          | 16.2                                         | 10.7                                         |
| C        |                 | 17.0         | 23.2                                         | 25.4                                         |
| C        |                 | 17.9         | 22.9                                         | 21.8                                         |
| H        |                 | 2.11         | 2.07                                         | 2.33                                         |
| H        |                 | 2.18         | 2.30                                         | 1.92                                         |
| H        |                 | 2.26         | 2.77                                         | 2.18                                         |
| H        |                 | 2.20         | 2.03                                         | 2.65                                         |
| H        | X               | 5.09         | 5.33                                         | 5.49                                         |
| H        |                 | 2.08         | 2.00                                         | 1.88                                         |
| H        |                 | 1.37         | 1.20                                         | 1.35                                         |
| H        |                 | 2.20         | 2.66                                         | 2.48                                         |
| H        |                 | 2.08         | 2.09                                         | 2.29                                         |
| H        | X               | 5.05         | 5.21                                         | 5.71                                         |
| H        |                 | 2.77         | 2.56                                         | 2.82                                         |
| H        |                 | 2.45         | 2.45                                         | 3.00                                         |
| H        |                 | 2.04         | 2.05                                         | 1.89                                         |
| H        |                 | 2.74         | 2.63                                         | 2.68                                         |
| H        |                 | 2.39         | 2.76                                         | 1.95                                         |
| H        |                 | 4.94         | 4.99                                         | 4.61                                         |
| H        |                 | 1.58         | 1.82                                         | 1.75                                         |
| H        |                 | 1.58         | 1.82                                         | 1.75                                         |
| H        |                 | 1.58         | 1.82                                         | 1.75                                         |
| H        |                 | 1.83         | 1.85                                         | 1.92                                         |
| H        |                 | 1.83         | 1.85                                         | 1.92                                         |
| H        |                 | 1.83         | 1.85                                         | 1.92                                         |
| H        |                 | 1.58         | 1.92                                         | 1.90                                         |
| H        |                 | 1.58         | 1.92                                         | 1.90                                         |
| H        |                 | 1.58         | 1.92                                         | 1.90                                         |
| H        |                 | 1.53         | 1.56                                         | 1.44                                         |
| H        |                 | 1.53         | 1.56                                         | 1.44                                         |
| H        |                 | 1.53         | 1.56                                         | 1.44                                         |

| Functional       | Solvent? |          | Basis Set   |          | Type of Data    |          |
|------------------|----------|----------|-------------|----------|-----------------|----------|
| mPW1PW91         | PCM      |          | 6-31+G(d,p) |          | Unscaled Shifts |          |
|                  | Isomer 1 | Isomer 2 | Isomer 3    | Isomer 4 | Isomer 5        | Isomer 6 |
| sDP4+ (H data)   | 99.97%   | 0.03%    | —           | —        | —               | —        |
| sDP4+ (C data)   | 100.00%  | 0.00%    | —           | —        | —               | —        |
| sDP4+ (all data) | 100.00%  | 0.00%    | —           | —        | —               | —        |
| uDP4+ (H data)   | 99.98%   | 0.02%    | —           | —        | —               | —        |
| uDP4+ (C data)   | 0.00%    | 100.00%  | —           | —        | —               | —        |
| uDP4+ (all data) | 0.01%    | 99.99%   | —           | —        | —               | —        |
| DP4+ (H data)    | 100.00%  | 0.00%    | —           | —        | —               | —        |
| DP4+ (C data)    | 98.47%   | 1.53%    | —           | —        | —               | —        |
| DP4+ (all data)  | 100.00%  | 0.00%    | —           | —        | —               | —        |

Figure S1. The DP4+ results between calculated and experimental NMR data for **1**.

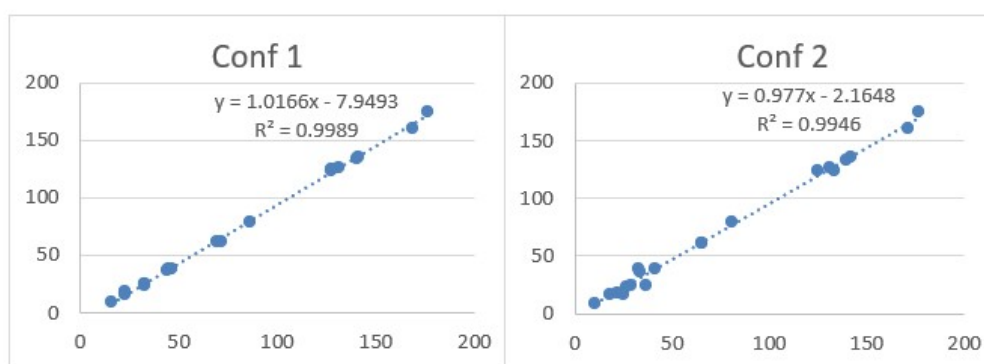

Figure S2. Correlation of experimental and calculated chemical shifts of compound **1**.

Table S7. Experimental NMR data and calculated NMR data for **4**.

| Nuclei | SP <sup>2</sup> | Experiment 4 | Calculation     |                 |
|--------|-----------------|--------------|-----------------|-----------------|
|        |                 |              | Conf.1 (4R, 6S) | Conf.1 (4R, 6R) |
| C      | X               | 141.1        | 141.2           | 147.8           |
| C      |                 | 38.7         | 38.9            | 32.1            |
| C      |                 | 24.3         | 26.2            | 33.9            |
| C      | X               | 125.9        | 131.1           | 129.3           |
| C      |                 | 48.5         | 44.1            | 55.3            |
| C      |                 | 73.4         | 82.5            | 80.1            |
| C      | X               | 124.8        | 123.2           | 128.6           |
| C      | X               | 117          | 127.7           | 125.8           |
| C      |                 | 36.2         | 38.9            | 43.7            |
| C      |                 | 22.5         | 24.3            | 27.2            |
| C      | X               | 151.9        | 156.8           | 158.4           |
| C      | X               | 148.2        | 147.2           | 150.1           |
| C      |                 | 72           | 76.8            | 81.3            |
| C      | X               | 131.7        | 134.5           | 137.6           |
| C      | X               | 123.2        | 123.9           | 127.3           |
| C      | X               | 170          | 171.6           | 172.5           |
| C      |                 | 17.2         | 18.8            | 24.7            |
| C      |                 | 9.3          | 11              | 18.5            |
| C      |                 | 17.1         | 16.9            | 25.2            |
| C      |                 | 32.9         | 30.8            | 39.2            |
| C      |                 | 55.1         | 56.3            | 60.4            |
| H      |                 | 2.1          | 1.96            | 3.2             |
| H      |                 | 2.1          | 1.96            | 3.2             |
| H      |                 | 2.1          | 1.96            | 3.36            |
| H      |                 | 2.22         | 2.41            | 3.41            |

|   |   |      |      |      |
|---|---|------|------|------|
| H | X | 4.86 | 4.91 | 6.02 |
| H |   | 2.03 | 2.16 | 2.95 |
| H |   | 2.16 | 2.76 | 4.02 |
| H |   | 4.3  | 4.25 | 5.15 |
| H | X | 4.88 | 5.21 | 5.96 |
| H | X | 5.23 | 5.91 | 6.62 |
| H |   | 2.33 | 2.31 | 3.56 |
| H |   | 2.33 | 2.31 | 3.56 |
| H |   | 2.54 | 2.61 | 3.63 |
| H |   | 2.54 | 2.61 | 3.81 |
| H |   | 1.66 | 1.68 | 2.95 |
| H |   | 1.66 | 1.68 | 2.95 |
| H |   | 1.66 | 1.68 | 2.95 |
| H |   | 1.93 | 1.92 | 3.08 |
| H |   | 1.93 | 1.92 | 3.08 |
| H |   | 1.93 | 1.92 | 3.08 |
| H |   | 1.6  | 1.85 | 2.89 |
| H |   | 1.6  | 1.85 | 2.89 |
| H |   | 1.6  | 1.85 | 2.89 |
| H |   | 1.45 | 1.29 | 2.55 |
| H |   | 1.45 | 1.29 | 2.55 |
| H |   | 1.45 | 1.29 | 2.55 |
| H |   | 3.21 | 3.3  | 4.15 |
| H |   | 3.21 | 3.3  | 4.15 |
| H |   | 3.21 | 3.3  | 4.15 |

|    | A                | B | C        | D        | E            | F        | G               | H        |    |
|----|------------------|---|----------|----------|--------------|----------|-----------------|----------|----|
| 1  | Functional       |   | Solvent? |          | Basis Set    |          | Type of Data    |          |    |
| 2  | mPW1PW91         |   | PCM      |          | 6-31+G(d, p) |          | Unscaled Shifts |          |    |
| 3  |                  |   |          |          |              |          |                 |          |    |
| 4  |                  |   | Isomer 1 | Isomer 2 | Isomer 3     | Isomer 4 | Isomer 5        | Isomer 6 | Is |
| 5  | sDP4+ (H data)   |   | 54.47%   | 45.53%   | –            | –        | –               | –        |    |
| 6  | sDP4+ (C data)   |   | 0.24%    | 99.76%   | –            | –        | –               | –        |    |
| 7  | sDP4+ (all data) |   | 0.29%    | 99.71%   | –            | –        | –               | –        |    |
| 8  | uDP4+ (H data)   |   | 100.00%  | 0.00%    | –            | –        | –               | –        |    |
| 9  | uDP4+ (C data)   |   | 100.00%  | 0.00%    | –            | –        | –               | –        |    |
| 10 | uDP4+ (all data) |   | 100.00%  | 0.00%    | –            | –        | –               | –        |    |
| 11 | DP4+ (H data)    |   | 100.00%  | 0.00%    | –            | –        | –               | –        |    |
| 12 | DP4+ (C data)    |   | 100.00%  | 0.00%    | –            | –        | –               | –        |    |
| 13 | DP4+ (all data)  |   | 100.00%  | 0.00%    | –            | –        | –               | –        |    |

Figure S3. The DP4<sup>+</sup> results between calculated and experimental NMR data for **4**.

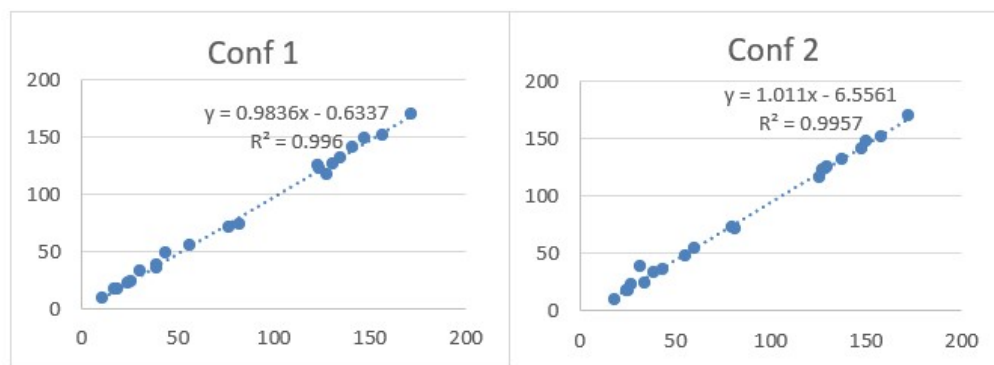

Figure S4. Correlation of experimental and calculated chemical shifts of compound **4**.

## 2.3 Elucidation of absolute configurations by TDDFT-ECD

To determine absolute configurations of compounds **1–5**, the spin-allowed excitation energies and rotatory

(Rn) and oscillator strengths (fn) of the lowest excited states of stable conformers were calculated for ECD spectra using TD-DFT method at the CAM-B3LYP/6-311G(d,p) level[36] with IEFPCM solvent model for methanol in agreement with the experiment condition. All the calculations in this article were performed using the Gaussian 09. Electronic transitions were expanded as Gaussian curves with a FQHM (full width at half maximum) for each peak of 0.40 eV. The ECD spectra were combined after Boltzmann weighting according to their population contribution.

### 3. Anti-inflammation assay of 1–5

Healthy macrophage fluorescent transgenic zebrafish (Tg: zlyz-EGFP) was provided by Biology Institute of Shandong Academy of Sciences (Jinan, China). Zebrafish maintenance and anti-inflammation assay were carried out as previously described[26]. Each zebrafish larva was photographed by a fluorescence microscope (AX-IO, Zom.V16), and the number of macrophages around the nerve mound was calculated through Image-Pro Plus software[28]. One-way analysis of variance was calculated by GraphPad Prism 7.00 software[29]. Sarcoele-ganolides C–G (1–5) were tested for anti-inflammatory activities with zebrafish models. Three dpf (days post fertilization) healthy macrophage fluorescent transgenic zebrafish were used as animal models to evaluate the anti-inflammatory effects of 1–5.

**Table S8.** Effects of samples on the anti-inflammatory effects of zebrafish internodes.

| Group                   | Concentration | Number of macrophages around nerve mound<br>(mean ± SEM) | Inhibition rate |
|-------------------------|---------------|----------------------------------------------------------|-----------------|
| Control                 | —             | 2.333 ± 0.954                                            | —               |
| CuSO <sub>4</sub> model | 20 μM         | 18.2 ± 1.685                                             | —               |
| Indomethacin            | 20 μM         | 10.36 ± 0.845                                            | 43.08%          |
| <b>1</b>                | 20 μM         | 16.17 ± 1.364                                            | 11.15%          |
| <b>2</b>                | 20 μM         | 15.45 ± 1.540                                            | 15.11%          |
| <b>3</b>                | 20 μM         | 7.938 ± 1.302                                            | 56.38%          |
| <b>4</b>                | 20 μM         | 11.57 ± 1.221                                            | 36.43%          |
| <b>5</b>                | 20 μM         | 13.79 ± 1.538                                            | 24.23%          |

### 4. Computational Details

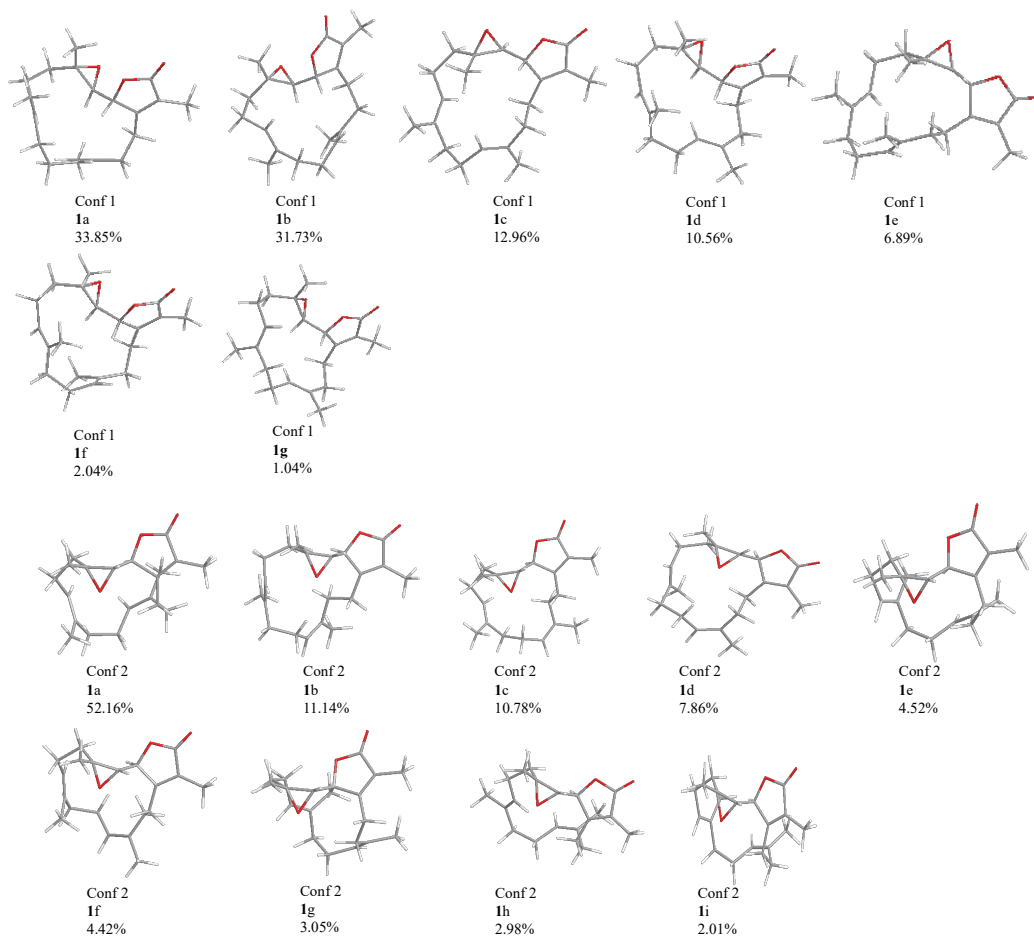

**Figure S5.** Stable conformers of compound 1 for relative configurations.

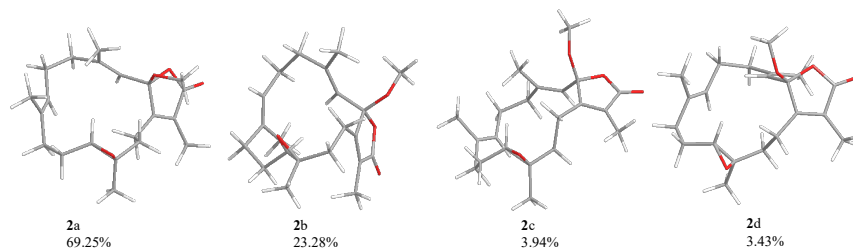

**Figure S6.** Stable conformers of compound 2 for relative configurations.

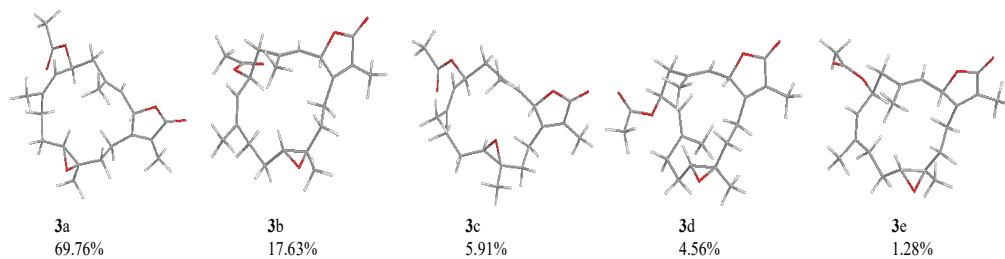

**Figure S7.** Stable conformers of compound 3 for relative configurations.

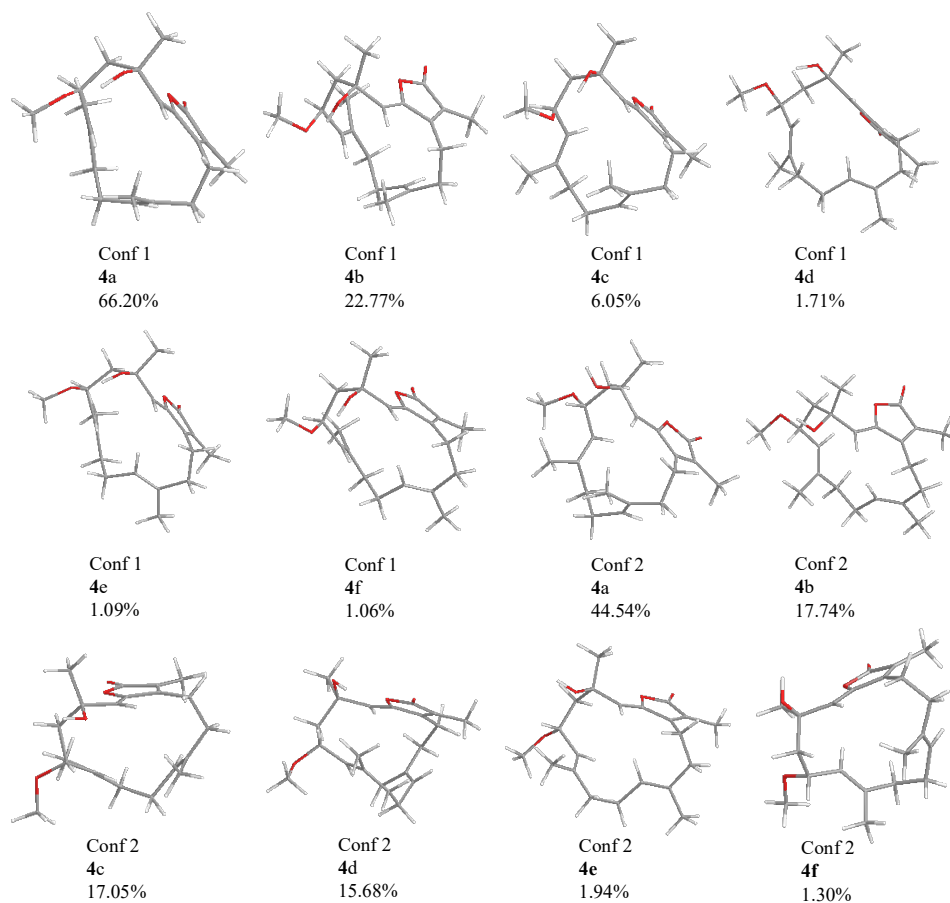

**Figure S8.** Stable conformers of compound **4** for relative configurations.

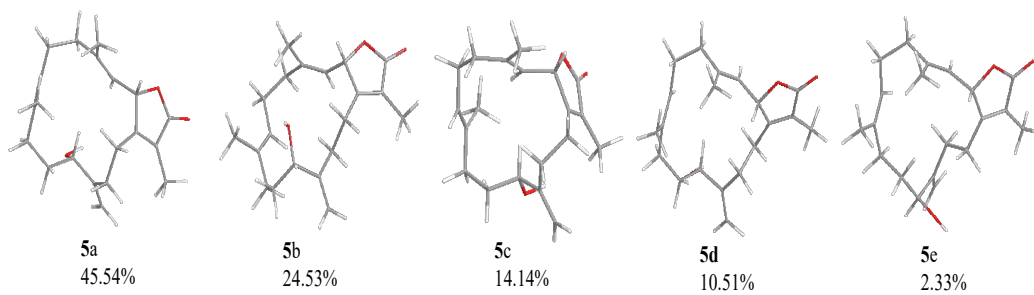

**Figure S9.** Stable conformers of compound **5** for relative configurations.

**Table S9.** Optimized Z-Matrixes of compounds **1-5** in the Gas Phase (Å) at B3LYP/6-31G (d, p) level.

|   | Con f. 1- <b>1a</b> |          |          | Con f. 1- <b>1 b</b> |          |          |
|---|---------------------|----------|----------|----------------------|----------|----------|
| C | -3.05318            | -0.29069 | -0.99297 | -3.2968              | -0.42333 | -0.56977 |
| C | -3.08345            | 1.05024  | -1.70492 | -3.34566             | 0.647    | -1.6385  |
| C | -2.66238            | 2.3083   | -0.92647 | -2.9826              | 2.0772   | -1.17071 |
| C | -1.17177            | 2.46515  | -0.79455 | -1.51257             | 2.31803  | -0.9605  |
| C | -1.67986            | -1.9156  | 1.97224  | -1.37256             | -2.53457 | 1.28135  |
| C | -2.96836            | -1.68371 | 1.15482  | -2.46222             | -2.71004 | 0.20133  |
| C | -2.93106            | -0.41737 | 0.33781  | -2.5666              | -1.53658 | -0.74378 |
| C | 0.24176             | -0.68529 | 0.88963  | 0.31318              | -0.78957 | 0.56076  |
| C | 1.05214             | 2.97986  | 0.17669  | 0.60131              | 2.99241  | 0.15953  |
| C | 1.98153             | 1.95018  | 0.87593  | 1.56301              | 2.08573  | 0.9785   |
| C | 2.19428             | 0.68642  | 0.10837  | 2.10101              | 0.93069  | 0.2018   |
| C | 1.05894             | -0.22642 | -0.29734 | 1.20762              | -0.10225 | -0.44697 |
| C | -0.44658            | -1.96555 | 1.09076  | -0.01865             | -2.21733 | 0.67588  |
| C | -0.43873            | 2.73274  | 0.29855  | -0.86493             | 2.61033  | 0.18023  |
| C | -3.23765            | -1.44813 | -1.94433 | -4.15356             | -0.17661 | 0.64659  |
| C | 3.35344             | 0.14402  | -0.31489 | 3.38511              | 0.60262  | -0.04191 |
| C | 3.04278             | -1.11688 | -0.99983 | 3.3955               | -0.62026 | -0.85443 |
| O | 1.69142             | -1.3105  | -0.99911 | 2.11068              | -1.00301 | -1.11122 |
| C | 4.76806             | 0.60205  | -0.18148 | 4.66648              | 1.24862  | 0.36958  |
| C | -1.00594            | 2.88673  | 1.68667  | -1.51653             | 2.664    | 1.53907  |
| O | 3.79522             | -1.92175 | -1.52297 | 4.34179              | -1.25616 | -1.28789 |
| O | 0.80471             | -1.64914 | 1.79437  | 0.91823              | -1.57363 | 1.60329  |
| C | -0.37693            | -3.12367 | 0.12441  | 0.57201              | -3.30241 | -0.19555 |
| H | -2.46349            | 0.97645  | -2.61105 | -2.69826             | 0.36456  | -2.47806 |
| H | -4.10859            | 1.19606  | -2.07925 | -4.37333             | 0.6875   | -2.03112 |
| H | -3.16842            | 2.34721  | 0.04226  | -3.56086             | 2.32683  | -0.27653 |
| H | -3.03671            | 3.17271  | -1.49535 | -3.32113             | 2.76792  | -1.9563  |
| H | -0.63798            | 2.39881  | -1.74534 | -0.92014             | 2.2981   | -1.87774 |
| H | -1.76795            | -2.85572 | 2.53162  | -1.29517             | -3.45302 | 1.87781  |
| H | -1.55554            | -1.10906 | 2.70455  | -1.65763             | -1.72166 | 1.95842  |
| H | -3.16325            | -2.55847 | 0.52852  | -3.41527             | -2.88954 | 0.71133  |
| H | -3.8026             | -1.62433 | 1.86866  | -2.24621             | -3.61546 | -0.37824 |
| H | -2.79301            | 0.48643  | 0.92933  | -1.96656             | -1.60763 | -1.65157 |
| H | -0.20687            | 0.17234  | 1.38802  | -0.44353             | -0.09299 | 0.92003  |
| H | 1.27415             | 3.95516  | 0.63167  | 0.68542              | 4.00205  | 0.58481  |
| H | 1.33626             | 3.05142  | -0.87904 | 0.96175              | 3.05754  | -0.87303 |
| H | 1.57384             | 1.70307  | 1.86487  | 1.04618              | 1.71102  | 1.8713   |
| H | 2.95329             | 2.41964  | 1.05228  | 2.40317              | 2.68622  | 1.3373   |
| H | 0.37584             | 0.26925  | -0.99564 | 0.56122              | 0.34364  | -1.21129 |
| H | -2.38878            | -1.51102 | -2.63933 | -5.13878             | 0.21346  | 0.35793  |
| H | -3.33563            | -2.41427 | -1.44536 | -4.30678             | -1.08039 | 1.24248  |
| H | -4.13295            | -1.29758 | -2.56383 | -3.70041             | 0.57489  | 1.30558  |
| H | 4.83823             | 1.56315  | 0.33345  | 5.25652              | 0.56957  | 0.9977   |
| H | 5.36009             | -0.1328  | 0.37807  | 5.27859              | 1.48443  | -0.50948 |
| H | 5.23461             | 0.70335  | -1.16907 | 4.4957               | 2.17139  | 0.92932  |
| H | -2.07577            | 2.67137  | 1.73649  | -2.60489             | 2.59112  | 1.49148  |
| H | -0.5002             | 2.22488  | 2.40186  | -1.16105             | 1.84574  | 2.17982  |
| H | -0.85031            | 3.9116   | 2.05219  | -1.25973             | 3.59844  | 2.05591  |
| H | -1.07842            | -2.97474 | -0.70278 | 0.39456              | -4.28033 | 0.26703  |
| H | 0.62383             | -3.23779 | -0.28993 | 0.10128              | -3.30783 | -1.18459 |
| H | -0.6567             | -4.05033 | 0.63932  | 1.64435              | -3.1653  | -0.32875 |
|   | Con f. 1- <b>1c</b> |          |          | Con f. 1- <b>1 d</b> |          |          |
| C | 3.65029             | -0.4093  | -0.40179 | 3.15188              | 0.57614  | 0.30692  |
| C | 3.94961             | 1.0469   | -0.68821 | 3.18899              | 2.05991  | 0.0023   |

|   |          |               |          |          |              |          |
|---|----------|---------------|----------|----------|--------------|----------|
| C | 3.65877  | 1.99464       | 0.5065   | 1.95082  | 2.85818      | 0.44961  |
| C | 2.23001  | 1.85804       | 0.94975  | 0.69137  | 2.47215      | -0.29409 |
| C | 0.85298  | -2.85317      | -1.02715 | 2.2303   | -2.55914     | -1.16743 |
| C | 2.35993  | -2.53519      | -0.986   | 3.4453   | -1.82246     | -0.56305 |
| C | 2.73045  | -1.08098      | -1.11585 | 3.35374  | -0.32286     | -0.67049 |
| C | -1.31549 | -1.67787      | -0.26946 | 0.11651  | -1.22956     | -0.68107 |
| C | -0.22336 | 2.0872        | 0.83835  | -1.74455 | 2.6354       | -0.93163 |
| C | -0.89359 | 1.44673       | -0.40741 | -1.78461 | 1.22565      | -1.5618  |
| C | -2.13595 | 0.69149       | -0.08574 | -1.98068 | 0.14772      | -0.54274 |
| C | -2.07417 | -0.66835      | 0.56139  | -0.84773 | -0.49064     | 0.23037  |
| C | -0.01251 | -2.2806       | 0.09866  | 0.96148  | -2.38625     | -0.35198 |
| C | 1.17322  | 2.54489       | 0.49011  | -0.52266 | 3.01303      | -0.11394 |
| C | 4.4499   | -1.00724      | 0.72938  | 2.92051  | 0.21838      | 1.75331  |
| C | -3.42365 | 1.00837       | -0.31689 | -3.14317 | -0.39254     | -0.12827 |
| C | -4.25836 | -0.11138      | 0.14479  | -2.84307 | -1.36251     | 0.93164  |
| O | -3.45772 | -1.09524      | 0.65253  | -1.49667 | -1.37945     | 1.15769  |
| C | -4.03908 | 2.21913       | -0.93468 | -4.54993 | -0.13285     | -0.55347 |
| C | 1.26454  | 3.69727       | -0.47727 | -0.78914 | 4.10048      | 0.89574  |
| O | -5.47123 | -0.23345      | 0.1158   | -3.59969 | -2.06871     | 1.57647  |
| O | -1.26658 | -3.01425      | 0.25139  | -0.26724 | -2.53175     | -1.14669 |
| C | 0.67696  | -1.96618      | 1.40495  | 0.95312  | -3.0762      | 0.9917   |
| H | 5.01135  | 1.15208       | -0.95831 | 4.0629   | 2.49327      | 0.51193  |
| H | 3.3598   | 1.38295       | -1.54928 | 3.34546  | 2.21005      | -1.07329 |
| H | 3.89218  | 3.01825       | 0.19417  | 2.16549  | 3.92544      | 0.2993   |
| H | 4.33537  | 1.75618       | 1.3358   | 1.81204  | 2.73798      | 1.53195  |
| H | 2.03105  | 1.03242       | 1.63331  | 0.81531  | 1.69477      | -1.04599 |
| H | 0.74876  | -3.94431      | -0.9743  | 2.45603  | -3.63092     | -1.23933 |
| H | 0.43604  | -2.54819      | -1.99418 | 2.04915  | -2.19523     | -2.18588 |
| H | 2.80669  | -3.08828      | -1.82643 | 3.5876   | -2.14216     | 0.47366  |
| H | 2.79201  | -2.96909      | -0.08062 | 4.33611  | -2.15461     | -1.11341 |
| H | 2.21436  | -0.54213      | -1.91345 | 3.48198  | 0.06222      | -1.68415 |
| H | -1.56345 | -1.63014      | -1.33114 | 0.49455  | -0.57262     | -1.46371 |
| H | -0.85034 | 2.92107       | 1.18112  | -1.86036 | 3.36929      | -1.74318 |
| H | -0.18273 | 1.34903       | 1.6469   | -2.6382  | 2.75263      | -0.30487 |
| H | -0.1705  | 0.75423       | -0.85717 | -0.87692 | 1.04536      | -2.14632 |
| H | -1.11106 | 2.21905       | -1.15005 | -2.62142 | 1.19832      | -2.2667  |
| H | -1.69165 | -0.62196      | 1.58367  | -0.28835 | 0.25287      | 0.8068   |
| H | 4.35773  | -2.09315      | 0.79706  | 1.87628  | 0.40161      | 2.04145  |
| H | 5.51539  | -0.76709      | 0.61377  | 3.14106  | -0.82889     | 1.97181  |
| H | 4.14034  | -0.58738      | 1.69624  | 3.53996  | 0.84107      | 2.41275  |
| H | -4.64236 | 1.94395       | -1.80844 | -5.05519 | -1.0718      | -0.80944 |
| H | -4.71222 | 2.71433       | -0.22395 | -5.12246 | 0.32746      | 0.26173  |
| H | -3.2804  | 2.94037       | -1.24911 | -4.59312 | 0.5331       | -1.41902 |
| H | 2.27943  | 4.09339       | -0.56691 | 0.11889  | 4.46445      | 1.38279  |
| H | 0.93756  | 3.40074       | -1.48317 | -1.2861  | 4.9576       | 0.41998  |
| H | 0.60471  | 4.51733       | -0.16371 | -1.47376 | 3.74067      | 1.67709  |
| H | 1.24053  | -2.84206      | 1.74596  | 1.3002   | -4.10987     | 0.87657  |
| H | 1.38122  | -1.13999      | 1.27668  | 1.63291  | -2.57059     | 1.68517  |
| H | -0.03856 | -1.70453      | 2.18727  | -0.04204 | -3.08438     | 1.43282  |
|   |          | Con f. 1- 1 e |          |          | Con f. 1-1 f |          |
| C | -3.53531 | 0.40439       | -0.7211  | 3.03359  | -0.27299     | 0.59676  |
| C | -3.87277 | -0.88792      | -1.43535 | 3.58022  | 1.13931      | 0.55853  |
| C | -3.49137 | -2.16267      | -0.63945 | 2.77462  | 2.22646      | 1.30413  |
| C | -2.0165  | -2.1584       | -0.36697 | 1.32117  | 2.44354      | 0.94168  |
| C | -0.74825 | 2.93333       | -0.67536 | 1.37937  | -2.69443     | -1.48715 |
| C | -2.25629 | 2.62215       | -0.72227 | 2.68644  | -2.46791     | -0.69839 |
| C | -2.6391  | 1.2616        | -1.24005 | 3.03654  | -1.01365     | -0.52376 |

|               |          |          |          |          |          |          |
|---------------|----------|----------|----------|----------|----------|----------|
| C             | 1.42126  | 1.65492  | -0.09174 | -0.28792 | -0.93092 | -0.73698 |
| C             | 0.1202   | -1.93448 | 0.90648  | -0.68217 | 3.00463  | -0.41292 |
| C             | 0.78344  | -1.42065 | -0.38668 | -1.53663 | 1.96646  | -1.19543 |
| C             | 2.10402  | -0.77349 | -0.15102 | -2.00674 | 0.84595  | -0.32957 |
| C             | 2.19286  | 0.54281  | 0.57965  | -1.05957 | -0.14731 | 0.30433  |
| C             | 0.10211  | 2.16963  | 0.34539  | 0.14594  | -2.33394 | -0.68088 |
| C             | -1.37663 | -2.15502 | 0.8112   | 0.78511  | 2.66606  | -0.26947 |
| C             | -4.27585 | 0.62085  | 0.57431  | 2.59247  | -0.77237 | 1.94772  |
| C             | 3.33818  | -1.14076 | -0.5424  | -3.2644  | 0.54615  | 0.05153  |
| C             | 4.28306  | -0.10123 | -0.10522 | -3.20206 | -0.61192 | 0.95128  |
| O             | 3.60188  | 0.88643  | 0.54923  | -1.89938 | -0.98468 | 1.1177   |
| C             | 3.81327  | -2.33817 | -1.29525 | -4.57554 | 1.1786   | -0.2794  |
| C             | -2.04667 | -2.31458 | 2.15234  | 1.5794   | 2.65377  | -1.55553 |
| O             | 5.49118  | -0.04274 | -0.25877 | -4.10474 | -1.20352 | 1.5196   |
| O             | 1.34124  | 2.88544  | 0.64331  | -0.99907 | -1.91688 | -1.50198 |
| C             | -0.61262 | 1.61789  | 1.55567  | -0.17678 | -3.27313 | 0.45951  |
| H             | -4.95321 | -0.91911 | -1.6397  | 4.57533  | 1.12666  | 1.03148  |
| H             | -3.36221 | -0.91412 | -2.40576 | 3.74491  | 1.43133  | -0.4819  |
| H             | -3.76903 | -3.03452 | -1.24907 | 3.32063  | 3.1727   | 1.16761  |
| H             | -4.07909 | -2.22081 | 0.28097  | 2.82309  | 2.01713  | 2.37844  |
| H             | -1.42082 | -2.04871 | -1.2721  | 0.64114  | 2.48874  | 1.79297  |
| H             | -0.64527 | 3.99537  | -0.41901 | 1.30973  | -3.7482  | -1.78523 |
| H             | -0.3133  | 2.81246  | -1.67455 | 1.3941   | -2.09482 | -2.40509 |
| H             | -2.69516 | 2.80973  | 0.26082  | 3.49847  | -2.95022 | -1.25953 |
| H             | -2.69447 | 3.37702  | -1.39315 | 2.62946  | -2.98589 | 0.26391  |
| H             | -2.16616 | 0.98481  | -2.18502 | 3.3594   | -0.52186 | -1.4439  |
| H             | 1.6874   | 1.77986  | -1.14286 | 0.32706  | -0.26049 | -1.33756 |
| H             | 0.62481  | -2.85499 | 1.23401  | -0.75902 | 3.95351  | -0.96091 |
| H             | 0.28987  | -1.21097 | 1.71391  | -1.13578 | 3.16748  | 0.57091  |
| H             | 0.12483  | -0.666   | -0.83485 | -0.95243 | 1.5744   | -2.03709 |
| H             | 0.88561  | -2.23136 | -1.11348 | -2.40702 | 2.47145  | -1.62312 |
| H             | 1.91686  | 0.45307  | 1.63289  | -0.33732 | 0.34744  | 0.96195  |
| H             | -3.9936  | -0.13847 | 1.315    | 3.36516  | -0.58353 | 2.70585  |
| H             | -4.09533 | 1.60133  | 1.02003  | 1.69164  | -0.2411  | 2.28277  |
| H             | -5.35856 | 0.51537  | 0.41956  | 2.36668  | -1.84115 | 1.95359  |
| H             | 4.34311  | -2.03667 | -2.20706 | -5.25023 | 0.44742  | -0.74136 |
| H             | 4.52141  | -2.91808 | -0.69039 | -5.07045 | 1.54022  | 0.63046  |
| H             | 2.98371  | -2.99221 | -1.57571 | -4.45849 | 2.02122  | -0.96517 |
| H             | -3.11183 | -2.54544 | 2.07627  | 1.09603  | 3.27353  | -2.31948 |
| H             | -1.56938 | -3.12264 | 2.72436  | 2.59565  | 3.03345  | -1.41158 |
| H             | -1.93519 | -1.40206 | 2.75424  | 1.66559  | 1.64046  | -1.96926 |
| H             | -1.18295 | 2.41419  | 2.04715  | -0.03949 | -4.30994 | 0.13119  |
| H             | -1.31428 | 0.8346   | 1.25498  | 0.49469  | -3.09792 | 1.30671  |
| H             | 0.08558  | 1.2042   | 2.2853   | -1.20131 | -3.14543 | 0.80485  |
| Con f. 1- 1 g |          |          |          |          |          |          |
| C             | -3.3341  | 0.00314  | -0.26364 |          |          |          |
| C             | -3.18039 | 1.27612  | -1.06896 |          |          |          |
| C             | -2.64171 | 2.50286  | -0.29738 |          |          |          |
| C             | -1.25623 | 2.3422   | 0.26946  |          |          |          |
| C             | -1.752   | -2.81214 | 0.90217  |          |          |          |
| C             | -2.91314 | -2.51539 | -0.07428 |          |          |          |
| C             | -2.82141 | -1.15205 | -0.71609 |          |          |          |
| C             | 0.12375  | -1.1594  | 0.53749  |          |          |          |
| C             | 1.16726  | 2.9154   | 0.68632  |          |          |          |
| C             | 1.49592  | 1.6015   | 1.43137  |          |          |          |
| C             | 1.97806  | 0.52589  | 0.5112   |          |          |          |
| C             | 1.0517   | -0.32805 | -0.32364 |          |          |          |

|              |          |          |              |          |          |          |
|--------------|----------|----------|--------------|----------|----------|----------|
| C            | -0.39891 | -2.50942 | 0.28612      |          |          |          |
| C            | -0.15264 | 3.03347  | -0.06077     |          |          |          |
| C            | -4.11535 | 0.1247   | 1.01967      |          |          |          |
| C            | 3.24926  | 0.16526  | 0.24739      |          |          |          |
| C            | 3.22069  | -0.89008 | -0.77313     |          |          |          |
| O            | 1.92588  | -1.13939 | -1.12747     |          |          |          |
| C            | 4.54748  | 0.66429  | 0.78894      |          |          |          |
| C            | -0.09933 | 4.08267  | -1.14382     |          |          |          |
| O            | 4.14433  | -1.49203 | -1.29417     |          |          |          |
| O            | 0.66755  | -2.27108 | 1.26727      |          |          |          |
| C            | -0.01657 | -3.36191 | -0.90079     |          |          |          |
| H            | -2.53706 | 1.08722  | -1.93695     |          |          |          |
| H            | -4.1703  | 1.55733  | -1.46156     |          |          |          |
| H            | -3.32962 | 2.72096  | 0.5318       |          |          |          |
| H            | -2.69502 | 3.36588  | -0.967       |          |          |          |
| H            | -1.1819  | 1.60562  | 1.06769      |          |          |          |
| H            | -1.78747 | -3.86596 | 1.20737      |          |          |          |
| H            | -1.87044 | -2.20189 | 1.80453      |          |          |          |
| H            | -2.91586 | -3.276   | -0.86448     |          |          |          |
| H            | -3.85432 | -2.63429 | 0.47357      |          |          |          |
| H            | -2.25084 | -1.11398 | -1.64473     |          |          |          |
| H            | -0.51311 | -0.51209 | 1.13813      |          |          |          |
| H            | 1.2006   | 3.73159  | 1.42329      |          |          |          |
| H            | 1.98879  | 3.12516  | -0.01045     |          |          |          |
| H            | 0.62862  | 1.25916  | 2.00556      |          |          |          |
| H            | 2.28481  | 1.81662  | 2.15798      |          |          |          |
| H            | 0.43791  | 0.28137  | -0.99648     |          |          |          |
| H            | -3.54681 | 0.68421  | 1.7747       |          |          |          |
| H            | -5.04973 | 0.67968  | 0.85923      |          |          |          |
| H            | -4.36671 | -0.84682 | 1.45347      |          |          |          |
| H            | 4.4      | 1.40883  | 1.57511      |          |          |          |
| H            | 5.14852  | 1.12032  | -0.00773     |          |          |          |
| H            | 5.1371   | -0.16406 | 1.20014      |          |          |          |
| H            | -1.06046 | 4.26033  | -1.63048     |          |          |          |
| H            | 0.25694  | 5.03976  | -0.73735     |          |          |          |
| H            | 0.62209  | 3.78897  | -1.91893     |          |          |          |
| H            | -0.24625 | -4.4125  | -0.68749     |          |          |          |
| H            | -0.5893  | -3.06761 | -1.78725     |          |          |          |
| H            | 1.04367  | -3.27219 | -1.13249     |          |          |          |
| Con f. 2- 1a |          |          | Con f. 2-1 b |          |          |          |
| C            | -3.36525 | 0.53547  | -0.06095     | -3.40905 | -0.37567 | 0.26125  |
| C            | -3.43313 | 2.04316  | 0.07418      | -3.8585  | 0.52834  | -0.87138 |
| C            | -2.11236 | 2.76204  | -0.28485     | -2.70852 | 1.3973   | -1.45335 |
| C            | -1.05501 | 2.59339  | 0.77507      | -2.32761 | 2.60188  | -0.63416 |
| C            | -1.47601 | -2.20786 | 1.21157      | -0.7654  | -2.42029 | 1.03147  |
| C            | -2.94607 | -1.73142 | 1.07353      | -2.29901 | -2.58817 | 0.91517  |
| C            | -3.08014 | -0.2329  | 1.0015       | -2.92251 | -1.59309 | -0.02819 |
| C            | 0.43298  | -1.81975 | -0.56725     | 1.14976  | -1.64941 | -0.572   |
| C            | 0.93885  | 2.61625  | -0.7547      | -0.26278 | 1.63548  | 0.42959  |
| C            | 1.08563  | 1.23918  | -1.46011     | 0.90526  | 1.61978  | -0.58506 |
| C            | 1.8534   | 0.25362  | -0.6404      | 2.01791  | 0.71115  | -0.16869 |
| C            | 1.17161  | -0.76735 | 0.23219      | 1.7646   | -0.66251 | 0.40702  |
| C            | -0.80795 | -2.48609 | -0.12418     | -0.02487 | -2.50226 | -0.28959 |
| C            | 0.27538  | 2.55122  | 0.60717      | -1.26036 | 2.74353  | 0.16707  |
| C            | -3.61153 | 0.01572  | -1.4531      | -3.49521 | 0.19943  | 1.65068  |
| C            | 3.18649  | 0.13306  | -0.48996     | 3.34653  | 0.93582  | -0.17384 |
| C            | 3.43958  | -0.91893 | 0.50339      | 4.01491  | -0.24598 | 0.38856  |

|              |          |          |              |          |          |          |
|--------------|----------|----------|--------------|----------|----------|----------|
| O            | 2.2437   | -1.42468 | 0.9427       | 3.07315  | -1.17172 | 0.74789  |
| C            | 4.30457  | 0.89921  | -1.11401     | 4.14128  | 2.11741  | -0.62124 |
| C            | 1.20388  | 2.46035  | 1.79374      | -0.9796  | 4.04135  | 0.88044  |
| O            | 4.49854  | -1.33612 | 0.93971      | 5.20321  | -0.45378 | 0.56373  |
| O            | -0.82861 | -1.39773 | -1.10143     | -0.12637 | -1.30911 | -1.12966 |
| C            | -1.13119 | -3.83132 | -0.73429     | -0.16137 | -3.79603 | -1.05773 |
| H            | -4.22635 | 2.42877  | -0.5797      | -4.25118 | -0.08781 | -1.68899 |
| H            | -3.70645 | 2.31794  | 1.10071      | -4.67673 | 1.18326  | -0.54244 |
| H            | -2.33637 | 3.83487  | -0.39644     | -3.03411 | 1.75577  | -2.43982 |
| H            | -1.75599 | 2.4215   | -1.26312     | -1.84615 | 0.74653  | -1.62737 |
| H            | -1.43517 | 2.55442  | 1.79743      | -3.00403 | 3.45362  | -0.72835 |
| H            | -1.44628 | -3.14516 | 1.77902      | -0.36373 | -3.19823 | 1.69405  |
| H            | -0.91575 | -1.47322 | 1.79697      | -0.56934 | -1.45592 | 1.50677  |
| H            | -3.49419 | -2.0798  | 1.95849      | -2.71568 | -2.49438 | 1.92376  |
| H            | -3.41395 | -2.21932 | 0.21257      | -2.53038 | -3.60608 | 0.57869  |
| H            | -2.91206 | 0.27417  | 1.95369      | -2.90527 | -1.88283 | -1.07978 |
| H            | 1.07567  | -2.34794 | -1.27396     | 1.87718  | -2.00164 | -1.30527 |
| H            | 0.374    | 3.26621  | -1.43099     | 0.14926  | 1.76459  | 1.43849  |
| H            | 1.9382   | 3.05521  | -0.65033     | -0.75534 | 0.66179  | 0.40881  |
| H            | 1.59855  | 1.39847  | -2.4155      | 0.51549  | 1.2929   | -1.55777 |
| H            | 0.09057  | 0.84144  | -1.67631     | 1.3004   | 2.631    | -0.72624 |
| H            | 0.50862  | -0.29105 | 0.95852      | 1.19231  | -0.59566 | 1.33478  |
| H            | -4.6227  | 0.28556  | -1.78924     | -3.11081 | -0.47578 | 2.42002  |
| H            | -2.91483 | 0.47692  | -2.16613     | -2.93684 | 1.14108  | 1.71359  |
| H            | -3.50102 | -1.06703 | -1.53757     | -4.53773 | 0.44198  | 1.90173  |
| H            | 4.77194  | 1.57181  | -0.38343     | 3.4965   | 2.94285  | -0.93291 |
| H            | 5.08663  | 0.21962  | -1.47219     | 4.79555  | 2.47019  | 0.18508  |
| H            | 3.95288  | 1.50187  | -1.95581     | 4.78894  | 1.8503   | -1.46579 |
| H            | 1.87852  | 1.59761  | 1.72308      | 0.02951  | 4.40903  | 0.64581  |
| H            | 1.84941  | 3.34848  | 1.85009      | -1.69705 | 4.82301  | 0.60931  |
| H            | 0.64991  | 2.38126  | 2.73516      | -1.01319 | 3.90696  | 1.971    |
| H            | -0.73643 | -4.63625 | -0.10394     | 0.42038  | -3.76393 | -1.98397 |
| H            | -2.21559 | -3.96811 | -0.81726     | 0.19755  | -4.6346  | -0.44995 |
| H            | -0.69317 | -3.92231 | -1.73285     | -1.20825 | -3.98929 | -1.31497 |
| Con f. 2- 1c |          |          | Con f. 2- 1d |          |          |          |
| C            | -3.44852 | -0.19231 | 0.3036       | -3.31428 | -0.31178 | 0.4133   |
| C            | -3.42551 | 1.31895  | 0.3666       | -3.89015 | 0.57106  | -0.67601 |
| C            | -2.52592 | 1.90301  | -0.76825     | -2.83253 | 1.42179  | -1.42772 |
| C            | -1.82079 | 3.1795   | -0.39031     | -2.30915 | 2.59392  | -0.64709 |
| C            | -0.96967 | -2.63932 | 1.07905      | -0.77098 | -2.50135 | 1.03906  |
| C            | -2.48512 | -2.3729  | 1.25359      | -2.31469 | -2.58857 | 1.02785  |
| C            | -2.78893 | -0.90102 | 1.23196      | -2.96884 | -1.5755  | 0.12207  |
| C            | 0.72734  | -1.62488 | -0.66206     | 1.11226  | -1.78097 | -0.59619 |
| C            | 0.18364  | 2.01117  | 0.56532      | 0.14904  | 2.01418  | -0.62989 |
| C            | 1.14717  | 1.5838   | -0.57092     | 0.66087  | 1.2716   | 0.62995  |
| C            | 2.06114  | 0.46881  | -0.17592     | 1.8956   | 0.46127  | 0.39093  |
| C            | 1.54622  | -0.85136 | 0.35034      | 1.91536  | -1.04465 | 0.47486  |
| C            | -0.46014 | -2.44699 | -0.33905     | -0.1378  | -2.52213 | -0.33792 |
| C            | -0.61739 | 3.24669  | 0.20154      | -1.04309 | 2.88807  | -0.3092  |
| C            | -4.10573 | -0.78418 | -0.91602     | -3.13772 | 0.32224  | 1.76808  |
| C            | 3.40786  | 0.42668  | -0.19571     | 3.14667  | 0.89702  | 0.1456   |
| C            | 3.8342   | -0.88782 | 0.3058       | 4.03197  | -0.27128 | 0.06419  |
| O            | 2.73109  | -1.62545 | 0.64024      | 3.30167  | -1.40836 | 0.28384  |
| C            | 4.41801  | 1.44094  | -0.61861     | 3.67728  | 2.28571  | 0.00439  |
| C            | 0.03468  | 4.56373  | 0.53289      | -0.72706 | 4.14933  | 0.45798  |
| O            | 4.95918  | -1.33544 | 0.44565      | 5.23375  | -0.32329 | -0.13477 |
| O            | -0.58516 | -1.10428 | -0.90314     | -0.14294 | -1.22878 | -1.01794 |

|              |          |          |          |              |          |          |
|--------------|----------|----------|----------|--------------|----------|----------|
| C            | -0.83708 | -3.53449 | -1.32003 | -0.47654     | -3.69145 | -1.23191 |
| H            | -4.43726 | 1.73971  | 0.28391  | -4.3934      | -0.05876 | -1.41907 |
| H            | -3.0232  | 1.63283  | 1.33561  | -4.65338     | 1.24188  | -0.25728 |
| H            | -3.13419 | 2.07094  | -1.66458 | -3.31974     | 1.80968  | -2.33547 |
| H            | -1.78657 | 1.14388  | -1.03713 | -2.02727     | 0.76031  | -1.76035 |
| H            | -2.34283 | 4.11273  | -0.606   | -3.0827      | 3.30115  | -0.3388  |
| H            | -0.7501  | -3.67669 | 1.35995  | -0.36501     | -3.34014 | 1.62032  |
| H            | -0.42351 | -2.00315 | 1.78183  | -0.48211     | -1.58058 | 1.55393  |
| H            | -2.77758 | -2.79483 | 2.22519  | -2.65754     | -2.47367 | 2.06219  |
| H            | -3.05141 | -2.91892 | 0.49349  | -2.61573     | -3.59504 | 0.71354  |
| H            | -2.32839 | -0.34321 | 2.05023  | -3.13264     | -1.90995 | -0.90326 |
| H            | 1.29319  | -1.87309 | -1.56204 | 1.74579      | -2.11085 | -1.41985 |
| H            | 0.77516  | 2.21578  | 1.46654  | -0.08814     | 1.27562  | -1.39742 |
| H            | -0.47806 | 1.17384  | 0.80145  | 0.96157      | 2.63839  | -1.02292 |
| H            | 0.54599  | 1.26644  | -1.43232 | 0.88654      | 2.00705  | 1.41156  |
| H            | 1.74274  | 2.44296  | -0.89421 | -0.13775     | 0.62974  | 1.00871  |
| H            | 0.99702  | -0.71573 | 1.28513  | 1.63683      | -1.37429 | 1.48075  |
| H            | -5.11843 | -0.37871 | -1.04554 | -2.49399     | 1.20731  | 1.69777  |
| H            | -3.54586 | -0.52375 | -1.82472 | -2.70001     | -0.35814 | 2.50382  |
| H            | -4.1806  | -1.87388 | -0.87643 | -4.10348     | 0.67278  | 2.15932  |
| H            | 3.94454  | 2.36724  | -0.95293 | 4.62631      | 2.38915  | 0.54263  |
| H            | 5.09829  | 1.67724  | 0.20878  | 3.87433      | 2.52847  | -1.04765 |
| H            | 5.03433  | 1.05275  | -1.43898 | 2.97069      | 3.02311  | 0.39516  |
| H            | 0.18666  | 4.66798  | 1.6167   | -0.24259     | 3.93087  | 1.41916  |
| H            | 1.0305   | 4.63912  | 0.07339  | -0.02753     | 4.78471  | -0.10367 |
| H            | -0.56295 | 5.41436  | 0.18818  | -1.62931     | 4.7347   | 0.66388  |
| H            | -0.47261 | -3.29604 | -2.32384 | 0.05567      | -3.61876 | -2.18528 |
| H            | -0.40349 | -4.49163 | -1.00886 | -0.1915      | -4.6317  | -0.74559 |
| H            | -1.92496 | -3.65494 | -1.36756 | -1.551       | -3.7306  | -1.43912 |
| Con f. 2- 1e |          |          |          | Con f. 2- 1f |          |          |
| C            | -3.17066 | 0.49384  | 0.85783  | 3.24784      | -0.48381 | -0.43042 |
| C            | -3.50554 | 1.82652  | 0.21661  | 3.76394      | 0.70324  | -1.22438 |
| C            | -2.36428 | 2.39819  | -0.65533 | 2.73546      | 1.83767  | -1.45053 |
| C            | -1.13997 | 2.82382  | 0.10882  | 2.403        | 2.6435   | -0.22645 |
| C            | -1.45872 | -2.29735 | 0.60055  | 0.6271       | -2.93313 | -0.63528 |
| C            | -2.98046 | -2.03634 | 0.61736  | 2.17412      | -2.82296 | -0.53795 |
| C            | -3.36033 | -0.6437  | 0.17164  | 2.71734      | -1.52964 | -1.08447 |
| C            | 0.392    | -1.5098  | -1.06279 | -1.07478     | -1.51803 | 0.8002   |
| C            | 0.56317  | 2.01538  | -1.54982 | -0.10161     | 2.3951   | -0.26528 |
| C            | 1.93759  | 1.31372  | -1.54798 | -0.95908     | 1.66186  | 0.80379  |
| C            | 2.14315  | 0.26898  | -0.49692 | -1.94687     | 0.74571  | 0.16416  |
| C            | 1.03818  | -0.63293 | -0.00771 | -1.53234     | -0.61881 | -0.32705 |
| C            | -0.82298 | -2.2998  | -0.77919 | -0.06366     | -2.58467 | 0.67011  |
| C            | 0.14737  | 2.68634  | -0.25354 | 1.19718      | 2.92426  | 0.29501  |
| C            | -2.57845 | 0.54728  | 2.24267  | 3.37902      | -0.38462 | 1.06644  |
| C            | 3.27936  | -0.04322 | 0.15733  | -3.25463     | 0.92481  | -0.10117 |
| C            | 2.99047  | -1.15278 | 1.07494  | -3.75164     | -0.28396 | -0.77468 |
| O            | 1.6711   | -1.49256 | 0.97099  | -2.72647     | -1.18322 | -0.91074 |
| C            | 4.65008  | 0.54108  | 0.07505  | -4.15881     | 2.08036  | 0.17199  |
| C            | 1.24871  | 3.29043  | 0.58267  | 1.0683       | 3.8166   | 1.50474  |
| O            | 3.73457  | -1.73397 | 1.84662  | -4.87068     | -0.53739 | -1.18536 |
| O            | -0.88375 | -1.05406 | -1.54196 | 0.27187      | -1.28058 | 1.24105  |
| C            | -1.08623 | -3.52509 | -1.62378 | -0.08635     | -3.69266 | 1.69898  |
| H            | -4.38617 | 1.71217  | -0.42694 | 4.6496       | 1.12364  | -0.72785 |
| H            | -3.76917 | 2.56195  | 0.98878  | 4.09044      | 0.3581   | -2.21243 |
| H            | -2.76441 | 3.27768  | -1.18528 | 1.84118      | 1.4086   | -1.91224 |
| H            | -2.11635 | 1.66288  | -1.42675 | 3.17144      | 2.52046  | -2.19642 |

|              |          |          |              |          |          |          |
|--------------|----------|----------|--------------|----------|----------|----------|
| H            | -1.34637 | 3.36996  | 1.03152      | 3.2732   | 3.08318  | 0.26629  |
| H            | -1.25794 | -3.2816  | 1.04271      | 0.34244  | -3.96255 | -0.88056 |
| H            | -0.97635 | -1.56276 | 1.247        | 0.26931  | -2.30811 | -1.45843 |
| H            | -3.32692 | -2.21919 | 1.64262      | 2.60961  | -3.64339 | -1.12274 |
| H            | -3.48928 | -2.77434 | -0.01312     | 2.492    | -2.984   | 0.49696  |
| H            | -3.77949 | -0.56242 | -0.83192     | 2.67237  | -1.45971 | -2.17401 |
| H            | 1.06899  | -1.8697  | -1.83785     | -1.80873 | -1.60687 | 1.60324  |
| H            | -0.19911 | 1.29877  | -1.86387     | -0.70311 | 3.22137  | -0.66981 |
| H            | 0.60934  | 2.77578  | -2.34317     | 0.09013  | 1.71341  | -1.09631 |
| H            | 2.74374  | 2.04994  | -1.47341     | -0.29692 | 1.07326  | 1.44688  |
| H            | 2.05748  | 0.83318  | -2.5298      | -1.4751  | 2.38878  | 1.43697  |
| H            | 0.26721  | -0.04925 | 0.50372      | -0.76723 | -0.54998 | -1.1055  |
| H            | -2.46686 | -0.44118 | 2.69658      | 2.81375  | 0.47762  | 1.44293  |
| H            | -1.58863 | 1.02365  | 2.22852      | 3.02109  | -1.27405 | 1.59016  |
| H            | -3.20535 | 1.15762  | 2.90697      | 4.42733  | -0.21752 | 1.35035  |
| H            | 5.0149   | 0.80554  | 1.07466      | -5.02249 | 1.76476  | 0.76994  |
| H            | 5.35824  | -0.18525 | -0.34358     | -3.63766 | 2.87804  | 0.70781  |
| H            | 4.67047  | 1.43613  | -0.55173     | -4.55177 | 2.49435  | -0.76494 |
| H            | 1.8435   | 4.00347  | -0.00607     | 0.39959  | 4.66461  | 1.29831  |
| H            | 0.84394  | 3.82254  | 1.4497       | 0.63465  | 3.28062  | 2.35946  |
| H            | 1.94976  | 2.53043  | 0.94985      | 2.03923  | 4.21532  | 1.81647  |
| H            | -2.16298 | -3.67558 | -1.76144     | -0.50427 | -3.3384  | 2.64619  |
| H            | -0.62214 | -3.42602 | -2.6098      | -0.69545 | -4.52926 | 1.33821  |
| H            | -0.68006 | -4.41705 | -1.13347     | 0.92671  | -4.06762 | 1.88495  |
| Con f. 2- 1g |          |          | Con f. 2- 1h |          |          |          |
| C            | -0.61689 | 2.37741  | 1.30638      | 3.76892  | -0.45281 | 0.13416  |
| C            | 0.02212  | 3.62123  | 0.72005      | 3.64979  | -1.89148 | -0.33486 |
| C            | 0.87572  | 3.34011  | -0.53956     | 2.25079  | -2.38554 | -0.72648 |
| C            | 2.10347  | 2.5135   | -0.28104     | 1.29647  | -2.40806 | 0.44437  |
| C            | -3.45263 | 0.09994  | 0.2245       | 1.34662  | 2.31638  | 0.86544  |
| C            | -2.61299 | 0.77844  | 1.31778      | 2.749    | 1.88539  | 0.37871  |
| C            | -1.81795 | 1.97253  | 0.8625       | 2.78083  | 0.43667  | -0.04178 |
| C            | -1.43155 | -1.15367 | -1.0446      | -0.84654 | 1.90997  | -0.54571 |
| C            | 1.66962  | 0.66341  | -1.93429     | -0.80784 | -2.5836  | -0.90947 |
| C            | 1.61801  | -0.87689 | -1.81728     | -1.17709 | -1.20446 | -1.52737 |
| C            | 1.03534  | -1.39699 | -0.54362     | -1.96691 | -0.34928 | -0.59038 |
| C            | -0.31608 | -0.94904 | -0.04308     | -1.32461 | 0.71654  | 0.25879  |
| C            | -2.81764 | -0.655   | -0.93469     | 0.39361  | 2.66282  | -0.26992 |
| C            | 2.47832  | 1.36152  | -0.86153     | -0.04026 | -2.50888 | 0.39589  |
| C            | 0.18684  | 1.66407  | 2.36422      | 5.09504  | -0.13461 | 0.77721  |
| C            | 1.53044  | -2.31873 | 0.30514      | -3.27822 | -0.41243 | -0.28889 |
| C            | 0.53773  | -2.54295 | 1.36531      | -3.54507 | 0.54849  | 0.78938  |
| O            | -0.5526  | -1.75102 | 1.13867      | -2.37893 | 1.18496  | 1.12811  |
| C            | 2.81625  | -3.07691 | 0.30022      | -4.35376 | -1.29607 | -0.82649 |
| C            | 3.79995  | 0.72389  | -0.50723     | -0.86064 | -2.57931 | 1.6606   |
| O            | 0.58638  | -3.29269 | 2.32544      | -4.58961 | 0.79819  | 1.36577  |
| O            | -1.83146 | 0.03502  | -1.75923     | 0.3111   | 1.68944  | -1.36153 |
| C            | -3.84928 | -1.39474 | -1.76607     | 0.47517  | 4.08972  | -0.76147 |
| H            | -0.75712 | 4.34024  | 0.44045      | 4.33747  | -2.04241 | -1.18099 |
| H            | 0.65115  | 4.11017  | 1.47639      | 4.03532  | -2.54398 | 0.46375  |
| H            | 1.19496  | 4.31314  | -0.94413     | 2.35958  | -3.40377 | -1.13007 |
| H            | 0.23358  | 2.88494  | -1.29946     | 1.85073  | -1.78428 | -1.55149 |
| H            | 2.78234  | 2.94252  | 0.45929      | 1.76694  | -2.36859 | 1.42808  |
| H            | -4.11325 | 0.85156  | -0.2305      | 1.43723  | 3.21334  | 1.48837  |
| H            | -4.11936 | -0.61972 | 0.71546      | 0.9378   | 1.53225  | 1.5099   |
| H            | -1.98736 | 0.04033  | 1.82369      | 3.46958  | 2.07462  | 1.18054  |
| H            | -3.33958 | 1.11517  | 2.07372      | 3.04859  | 2.5346   | -0.45826 |

|             |          |          |          |          |          |          |
|-------------|----------|----------|----------|----------|----------|----------|
| H           | -2.30959 | 2.58811  | 0.10622  | 1.87669  | 0.1016   | -0.53746 |
| H           | -1.29014 | -2.02705 | -1.68267 | -1.66426 | 2.42869  | -1.04946 |
| H           | 0.64872  | 1.05038  | -1.96695 | -0.22849 | -3.12665 | -1.66438 |
| H           | 2.11651  | 0.88218  | -2.91533 | -1.7358  | -3.14597 | -0.75169 |
| H           | 2.61435  | -1.30331 | -1.96036 | -1.7606  | -1.3869  | -2.43711 |
| H           | 0.99888  | -1.24527 | -2.6475  | -0.26205 | -0.68297 | -1.81824 |
| H           | -0.29079 | 0.09843  | 0.25954  | -0.52405 | 0.30043  | 0.87571  |
| H           | 0.29676  | 2.30329  | 3.25178  | 5.92146  | -0.37515 | 0.09331  |
| H           | -0.26075 | 0.72072  | 2.68693  | 5.19678  | 0.91545  | 1.06227  |
| H           | 1.20139  | 1.454    | 2.00398  | 5.25021  | -0.74902 | 1.6754   |
| H           | 2.62599  | -4.15719 | 0.30001  | -4.6451  | -2.05103 | -0.08506 |
| H           | 3.42633  | -2.83532 | -0.57311 | -5.25174 | -0.71287 | -1.0617  |
| H           | 3.39881  | -2.8548  | 1.2029   | -4.02698 | -1.81503 | -1.73167 |
| H           | 3.66608  | -0.25504 | -0.03033 | -1.60592 | -1.77555 | 1.71236  |
| H           | 4.40967  | 0.55293  | -1.40581 | -1.42409 | -3.52214 | 1.70772  |
| H           | 4.37542  | 1.35405  | 0.1786   | -0.23034 | -2.51391 | 2.55399  |
| H           | -3.38868 | -1.84681 | -2.64949 | 0.1511   | 4.77901  | 0.02654  |
| H           | -4.31947 | -2.1876  | -1.17351 | 1.50738  | 4.34413  | -1.02954 |
| H           | -4.63615 | -0.70716 | -2.0976  | -0.15969 | 4.23874  | -1.64015 |
| Con f.2- Ii |          |          |          |          |          |          |
| C           | -3.11681 | 0.99207  | 0.44575  |          |          |          |
| C           | -3.0753  | 2.28713  | -0.34481 |          |          |          |
| C           | -1.67663 | 2.6724   | -0.87922 |          |          |          |
| C           | -0.639   | 2.84132  | 0.20109  |          |          |          |
| C           | -1.96183 | -2.07359 | 0.81836  |          |          |          |
| C           | -3.36969 | -1.53701 | 0.47409  |          |          |          |
| C           | -3.35938 | -0.17325 | -0.17515 |          |          |          |
| C           | 0.19543  | -1.93913 | -0.67334 |          |          |          |
| C           | 1.37205  | 2.37245  | -1.24224 |          |          |          |
| C           | 1.36013  | 0.88017  | -1.66761 |          |          |          |
| C           | 1.84846  | -0.04857 | -0.60344 |          |          |          |
| C           | 0.89985  | -0.90899 | 0.18671  |          |          |          |
| C           | -1.14922 | -2.48177 | -0.39626 |          |          |          |
| C           | 0.68853  | 2.69112  | 0.07594  |          |          |          |
| C           | -2.8491  | 1.08585  | 1.92925  |          |          |          |
| C           | 3.10293  | -0.26825 | -0.16707 |          |          |          |
| C           | 3.03863  | -1.24585 | 0.92796  |          |          |          |
| O           | 1.73316  | -1.60977 | 1.13496  |          |          |          |
| C           | 4.39742  | 0.332    | -0.6038  |          |          |          |
| C           | 1.60488  | 2.87402  | 1.25999  |          |          |          |
| O           | 3.938    | -1.71428 | 1.60428  |          |          |          |
| O           | -0.93569 | -1.44699 | -1.40844 |          |          |          |
| C           | -1.49602 | -3.82777 | -0.99127 |          |          |          |
| H           | -3.74914 | 2.21112  | -1.20656 |          |          |          |
| H           | -3.44966 | 3.10918  | 0.28057  |          |          |          |
| H           | -1.78429 | 3.61218  | -1.44455 |          |          |          |
| H           | -1.35906 | 1.91476  | -1.60323 |          |          |          |
| H           | -1.02221 | 3.13512  | 1.17817  |          |          |          |
| H           | -2.05889 | -2.96236 | 1.454    |          |          |          |
| H           | -1.43611 | -1.32044 | 1.40978  |          |          |          |
| H           | -3.94367 | -1.50655 | 1.40894  |          |          |          |
| H           | -3.88502 | -2.2517  | -0.17769 |          |          |          |
| H           | -3.53311 | -0.14964 | -1.25099 |          |          |          |
| H           | 0.88509  | -2.5539  | -1.25441 |          |          |          |
| H           | 0.90831  | 2.93966  | -2.05767 |          |          |          |
| H           | 2.41607  | 2.70016  | -1.18347 |          |          |          |
| H           | 1.99443  | 0.7791   | -2.55651 |          |          |          |

|   |              |          |          |              |          |          |
|---|--------------|----------|----------|--------------|----------|----------|
| H | 0.34743      | 0.58993  | -1.95601 |              |          |          |
| H | 0.18208      | -0.2953  | 0.73788  |              |          |          |
| H | -1.77774     | 1.19933  | 2.13922  |              |          |          |
| H | -3.19549     | 0.20178  | 2.47308  |              |          |          |
| H | -3.34637     | 1.9646   | 2.35919  |              |          |          |
| H | 5.16446      | -0.44277 | -0.71736 |              |          |          |
| H | 4.76821      | 1.04661  | 0.14216  |              |          |          |
| H | 4.28873      | 0.85957  | -1.55529 |              |          |          |
| H | 2.19089      | 1.96462  | 1.44872  |              |          |          |
| H | 2.33141      | 3.67885  | 1.07911  |              |          |          |
| H | 1.0478       | 3.11384  | 2.17207  |              |          |          |
| H | -1.28514     | -4.62526 | -0.26976 |              |          |          |
| H | -0.91399     | -4.01476 | -1.89881 |              |          |          |
| H | -2.56076     | -3.87551 | -1.24644 |              |          |          |
|   | Con f. 1- 2a |          |          | Con f. 1- 2b |          |          |
| C | 3.52882      | -0.85763 | -0.63024 | 1.51792      | 2.35553  | 1.27114  |
| C | 3.7758       | 0.55742  | -1.11679 | 2.94886      | 1.96926  | 0.95568  |
| C | 3.69072      | 1.64057  | -0.02183 | 3.14401      | 0.4526   | 0.7361   |
| C | 2.33708      | 1.65979  | 0.63936  | 2.19938      | -0.06855 | -0.31422 |
| C | 0.74401      | -3.32498 | -0.83973 | -1.41678     | 3.18538  | -0.76892 |
| C | 2.26539      | -3.065   | -0.90806 | -0.6058      | 3.57381  | 0.48014  |
| C | 2.60882      | -1.6346  | -1.22575 | 0.82159      | 3.10463  | 0.40225  |
| C | -1.04555     | -1.74184 | -0.28913 | -1.6423      | 0.82772  | 0.0128   |
| C | -0.17771     | 2.06551  | 0.55746  | 1.33298      | -1.9722  | -1.86991 |
| C | -0.7488      | 1.33743  | -0.67771 | -0.0811      | -1.41816 | -1.67197 |
| C | -1.99413     | 0.55566  | -0.42045 | -0.67342     | -1.48939 | -0.29929 |
| C | -1.94648     | -0.7456  | 0.38679  | -1.9211      | -0.65914 | -0.00252 |
| C | 0.01229      | -2.44133 | 0.15113  | -1.73671     | 1.71778  | -0.98662 |
| C | 1.22853      | 2.56437  | 0.28648  | 2.46942      | -1.14804 | -1.27804 |
| C | 4.40824      | -1.30356 | 0.51203  | 0.964        | 1.80211  | 2.55965  |
| C | -3.23885     | 0.75187  | -0.88341 | -0.33439     | -2.18246 | 0.80403  |
| C | -4.07815     | -0.37809 | -0.43722 | -1.3276      | -1.88208 | 1.85432  |
| C | -3.81579     | 1.84049  | -1.72421 | 0.79559      | -3.11889 | 1.10409  |
| O | -5.25863     | -0.58181 | -0.65674 | -1.38005     | -2.29913 | 2.99756  |
| C | 0.58017      | -2.456   | 1.54663  | -2.19756     | 1.41506  | -2.38909 |
| O | -3.32646     | -1.25315 | 0.28567  | -2.25851     | -1.01392 | 1.37696  |
| O | 2.01332      | 2.78908  | 1.4934   | 2.48146      | 0.24857  | -1.70433 |
| C | 1.36431      | 3.63125  | -0.77423 | 3.81107      | -1.84109 | -1.34068 |
| O | -1.63588     | -0.57647 | 1.7342   | -2.94213     | -1.11078 | -0.84306 |
| C | -2.50681     | 0.27943  | 2.48654  | -4.24222     | -0.55789 | -0.59098 |
| H | 4.78486      | 0.61171  | -1.55159 | 3.27904      | 2.49572  | 0.05259  |
| H | 3.07007      | 0.79965  | -1.92051 | 3.61078      | 2.28355  | 1.77506  |
| H | 3.91844      | 2.61551  | -0.46207 | 2.94448      | -0.09287 | 1.66754  |
| H | 4.45224      | 1.4583   | 0.74681  | 4.18628      | 0.26032  | 0.46661  |
| H | 2.04384      | 0.70536  | 1.08092  | 1.15813      | 0.11291  | -0.06549 |
| H | 0.59712      | -4.37668 | -0.5534  | -0.88523     | 3.55062  | -1.65904 |
| H | 0.309        | -3.20071 | -1.83787 | -2.37159     | 3.73258  | -0.76231 |
| H | 2.73154      | -3.38298 | 0.02793  | -1.10632     | 3.22162  | 1.38697  |
| H | 2.66962      | -3.72396 | -1.69126 | -0.61602     | 4.6724   | 0.53362  |
| H | 2.04426      | -1.20196 | -2.0544  | 1.33926      | 3.42188  | -0.50574 |
| H | -1.32044     | -1.84676 | -1.33738 | -1.28093     | 1.15448  | 0.98073  |
| H | -0.82893     | 2.90542  | 0.82924  | 1.40417      | -2.99449 | -1.48704 |
| H | -0.14        | 1.38207  | 1.40902  | 1.51824      | -2.0409  | -2.9496  |
| H | -0.93113     | 2.0557   | -1.48176 | -0.1044      | -0.3738  | -2.00416 |
| H | 0.01372      | 0.63319  | -1.03728 | -0.76704     | -1.95027 | -2.34589 |
| H | 4.32403      | -2.37089 | 0.72694  | 0.00033      | 2.23963  | 2.83093  |
| H | 5.4622       | -1.08857 | 0.28807  | 1.66165      | 1.98079  | 3.38885  |

|              |          |          |              |          |          |          |
|--------------|----------|----------|--------------|----------|----------|----------|
| H            | 4.17085  | -0.75839 | 1.4349       | 0.82712  | 0.71342  | 2.49741  |
| H            | -4.26085 | 1.42842  | -2.638       | 0.74422  | -3.42295 | 2.15348  |
| H            | -4.61701 | 2.35933  | -1.18363     | 0.74928  | -4.02326 | 0.48827  |
| H            | -3.05795 | 2.57591  | -2.00479     | 1.76773  | -2.64667 | 0.93448  |
| H            | -0.10373 | -2.04755 | 2.28636      | -2.46211 | 0.36988  | -2.54091 |
| H            | 0.83876  | -3.48411 | 1.83012      | -3.06793 | 2.03585  | -2.64232 |
| H            | 1.51273  | -1.87765 | 1.58302      | -1.40751 | 1.68372  | -3.10252 |
| H            | 2.37551  | 4.04258  | -0.80425     | 4.6292   | -1.16977 | -1.07118 |
| H            | 1.12665  | 3.22828  | -1.76501     | 3.9946   | -2.212   | -2.35644 |
| H            | 0.66737  | 4.45325  | -0.5705      | 3.82722  | -2.70205 | -0.66223 |
| H            | -2.58014 | 1.27754  | 2.04424      | -4.87569 | -0.90056 | -1.41137 |
| H            | -3.50627 | -0.15827 | 2.5701       | -4.63886 | -0.92903 | 0.35954  |
| H            | -2.05649 | 0.3539   |              | -4.21928 | 0.53547  | -0.57473 |
| Con f. 1- 2c |          |          | Con f. 1- 2d |          |          |          |
| C            | 3.71786  | -0.87293 | -0.34229     | 3.20522  | -1.35088 | 0.10078  |
| C            | 4.25255  | 0.54217  | -0.43286     | 4.18003  | -0.21163 | -0.12275 |
| C            | 3.82152  | 1.45451  | 0.73608      | 3.91545  | 1.04011  | 0.74112  |
| C            | 2.31775  | 1.50681  | 0.84906      | 2.46587  | 1.45307  | 0.67291  |
| C            | 0.67912  | -2.70215 | -1.4829      | 0.23107  | -2.69302 | -1.7765  |
| C            | 2.21388  | -2.69437 | -1.32774     | 1.49534  | -2.95907 | -0.94757 |
| C            | 2.82441  | -1.32254 | -1.23972     | 2.45566  | -1.79888 | -0.91921 |
| C            | -1.25984 | -1.42646 | -0.67072     | -0.71734 | -1.24687 | 0.02392  |
| C            | 0.04918  | 1.85822  | -0.35163     | 0.36403  | 1.89219  | -0.75398 |
| C            | -0.77632 | 1.32564  | 0.83632      | -0.55743 | 1.94182  | 0.48718  |
| C            | -2.06034 | 0.74762  | 0.33895      | -1.76073 | 1.07279  | 0.34441  |
| C            | -2.26631 | -0.75703 | 0.23489      | -1.71704 | -0.39047 | 0.76489  |
| C            | -0.1197  | -2.06569 | -0.35726     | -0.84518 | -1.80621 | -1.18859 |
| C            | 1.45839  | 2.32532  | -0.0189      | 1.83789  | 2.14633  | -0.46008 |
| C            | 4.26878  | -1.68555 | 0.80216      | 3.17006  | -1.91681 | 1.49729  |
| C            | -3.14198 | 1.3803   | -0.14393     | -2.9943  | 1.37169  | -0.09398 |
| C            | -4.10024 | 0.36266  | -0.60756     | -3.82706 | 0.16218  | 0.02577  |
| C            | -3.43979 | 2.8375   | -0.26487     | -3.55922 | 2.65139  | -0.61234 |
| O            | -5.19868 | 0.51601  | -1.11019     | -5.0025  | 0.00853  | -0.25156 |
| C            | 0.4126   | -2.28951 | 1.03265      | -2.0569  | -1.65268 | -2.0814  |
| O            | -3.57413 | -0.88111 | -0.41574     | -3.07518 | -0.86357 | 0.5189   |
| O            | 1.70251  | 2.71943  | 1.36367      | 2.1362   | 2.86425  | 0.7741   |
| C            | 2.03508  | 3.25913  | -1.05861     | 2.63521  | 2.5871   | -1.66479 |
| O            | -2.37434 | -1.25479 | 1.53847      | -1.47878 | -0.39725 | 2.15018  |
| C            | -2.80822 | -2.61902 | 1.6451       | -1.49969 | -1.68763 | 2.7759   |
| H            | 5.35132  | 0.51475  | -0.45506     | 5.20134  | -0.55961 | 0.09027  |
| H            | 3.92304  | 0.99812  | -1.37341     | 4.1551   | 0.07807  | -1.17896 |
| H            | 4.22377  | 2.45982  | 0.57942      | 4.56069  | 1.85713  | 0.40401  |
| H            | 4.24042  | 1.09115  | 1.68224      | 4.17461  | 0.84264  | 1.78841  |
| H            | 1.87193  | 0.60302  | 1.26273      | 1.8077   | 0.82404  | 1.2728   |
| H            | 0.37061  | -3.75615 | -1.55534     | -0.24901 | -3.65476 | -2.01216 |
| H            | 0.40108  | -2.23421 | -2.4347      | 0.5196   | -2.2774  | -2.75399 |
| H            | 2.61903  | -3.20815 | -2.21257     | 2.00483  | -3.81422 | -1.41703 |
| H            | 2.49644  | -3.30852 | -0.46865     | 1.21995  | -3.28805 | 0.05947  |
| H            | 2.5099   | -0.63205 | -2.02522     | 2.58065  | -1.30435 | -1.88508 |
| H            | -1.52136 | -1.31734 | -1.72129     | 0.21446  | -1.36186 | 0.56755  |
| H            | 0.13334  | 1.07923  | -1.11887     | 0.30139  | 0.91011  | -1.23439 |
| H            | -0.50166 | 2.68747  | -0.81131     | 0.0047   | 2.62189  | -1.48897 |
| H            | -0.22327 | 0.56096  | 1.38704      | -0.01712 | 1.61705  | 1.37986  |
| H            | -0.98076 | 2.14752  | 1.53         | -0.86844 | 2.97527  | 0.66453  |
| H            | 5.36539  | -1.72917 | 0.74517      | 2.51759  | -2.78849 | 1.58803  |
| H            | 4.0285   | -1.22077 | 1.76724      | 2.82612  | -1.16576 | 2.22124  |
| H            | 3.89396  | -2.71081 | 0.82507      | 4.17786  | -2.21625 | 1.81696  |

|              |          |          |              |          |          |          |
|--------------|----------|----------|--------------|----------|----------|----------|
| H            | -2.70328 | 3.4398   | 0.27335      | -4.44313 | 2.94712  | -0.03463 |
| H            | -3.43883 | 3.15033  | -1.31675     | -2.82401 | 3.45899  | -0.565   |
| H            | -4.43561 | 3.06026  | 0.1359       | -3.88028 | 2.53768  | -1.65526 |
| H            | 0.50633  | -3.36525 | 1.2353       | -2.39259 | -0.61283 | -2.14458 |
| H            | 1.41926  | -1.8671  | 1.11836      | -1.82463 | -1.98817 | -3.09727 |
| H            | -0.21357 | -1.84325 | 1.80242      | -2.90138 | -2.25054 | -1.72061 |
| H            | 3.06986  | 3.53459  | -0.84552     | 3.698    | 2.70066  | -1.43956 |
| H            | 1.9963   | 2.78969  | -2.04845     | 2.52638  | 1.85629  | -2.47461 |
| H            | 1.43665  | 4.17712  | -1.10266     | 2.2558   | 3.54879  | -2.03101 |
| H            | -2.63501 | -2.90819 | 2.68354      | -1.33075 | -1.50292 | 3.83882  |
| H            | -3.87531 | -2.69931 | 1.41429      | -2.4711  | -2.17391 | 2.63915  |
| H            | -2.24164 | -3.27765 | 0.98067      | -0.70795 | -2.33947 | 2.39111  |
| Con f. 1- 3a |          |          | Con f. 1- 3b |          |          |          |
| C            | 0.65305  | 2.69825  | 0.36502      | 1.11103  | 2.69271  | 0.12074  |
| C            | 1.07309  | -2.26644 | 0.96253      | 1.06169  | -2.17238 | 1.20584  |
| C            | 2.09426  | -1.42625 | 0.17833      | 2.05536  | -1.40533 | 0.31139  |
| C            | -1.2804  | -1.62182 | 0.68893      | -1.24858 | -1.39723 | 0.9388   |
| C            | -1.83345 | 2.14994  | 0.11683      | -1.41872 | 2.31646  | -0.03574 |
| C            | -2.0675  | 0.9758   | -0.85675     | -1.78811 | 1.07267  | -0.86952 |
| C            | -2.97199 | -0.07491 | -0.31038     | -2.79244 | 0.19352  | -0.20483 |
| C            | -2.56736 | -0.8884  | 0.89917      | -2.45494 | -0.52609 | 1.08302  |
| C            | -0.15159 | -1.49209 | 1.40322      | -0.10258 | -1.30295 | 1.6309   |
| C            | -0.63374 | 2.97631  | -0.30164     | -0.16414 | 2.98588  | -0.56249 |
| C            | -4.1611  | -0.51246 | -0.76291     | -4.03071 | -0.15681 | -0.59756 |
| C            | -4.59733 | -1.61881 | 0.1036       | -4.56549 | -1.11244 | 0.38555  |
| O            | -3.6608  | -1.83911 | 1.06963      | -3.63813 | -1.33345 | 1.35979  |
| C            | -4.99507 | -0.07224 | -1.91895     | -4.83731 | 0.24688  | -1.78588 |
| O            | -0.13213 | 3.86087  | 0.73904      | 0.41874  | 3.94543  | 0.36319  |
| O            | -5.61608 | -2.28799 | 0.04122      | -5.65197 | -1.66868 | 0.40393  |
| C            | 0.00063  | -0.64175 | 2.63393      | 0.1439   | -0.36986 | 2.78354  |
| C            | -0.70507 | 3.59607  | -1.6773      | -0.21239 | 3.44319  | -2.00147 |
| O            | 3.04956  | -2.43425 | -0.32656     | 2.90482  | -2.39674 | -0.375   |
| C            | 3.73413  | -2.15016 | -1.44597     | 2.41715  | -2.93745 | -1.50534 |
| O            | 3.57607  | -1.13327 | -2.10274     | 1.32341  | -2.65724 | -1.97231 |
| C            | 4.72335  | -3.23441 | -1.76863     | 3.38726  | -3.91347 | -2.10743 |
| C            | 2.86042  | -0.44746 | 1.01353      | 2.98575  | -0.50894 | 1.06583  |
| C            | 3.14217  | 0.83938  | 0.75053      | 3.43765  | 0.69508  | 0.67788  |
| C            | 2.73488  | 1.58528  | -0.50232     | 3.10631  | 1.35323  | -0.64363 |
| C            | 2.0144   | 2.92358  | -0.24265     | 2.47745  | 2.75595  | -0.51558 |
| C            | 3.95737  | 1.63424  | 1.7402       | 4.36538  | 1.47206  | 1.5765   |
| H            | 0.63468  | 1.92296  | 1.13278      | 1.05025  | 2.01449  | 0.97345  |
| H            | 1.57866  | -2.69997 | 1.83418      | 1.59851  | -2.56342 | 2.07811  |
| H            | 0.76864  | -3.09005 | 0.31048      | 0.68459  | -3.02252 | 0.63271  |
| H            | 1.61344  | -0.96336 | -0.68305     | 1.5007   | -0.87287 | -0.46028 |
| H            | -1.28581 | -2.28369 | -0.17614     | -1.31426 | -2.1175  | 0.12427  |
| H            | -2.72863 | 2.78211  | 0.15023      | -2.25196 | 3.02897  | -0.0546  |
| H            | -1.65991 | 1.77553  | 1.12989      | -1.25131 | 2.03797  | 1.00888  |
| H            | -1.09873 | 0.50381  | -1.06771     | -0.87848 | 0.47809  | -1.02744 |
| H            | -2.45887 | 1.34649  | -1.80668     | -2.15102 | 1.3742   | -1.85465 |
| H            | -2.54844 | -0.27075 | 1.80022      | -2.35792 | 0.1784   | 1.91282  |
| H            | -5.98767 | 0.24441  | -1.5792      | -4.30534 | 0.97101  | -2.40612 |
| H            | -4.53215 | 0.75905  | -2.45449     | -5.0817  | -0.62587 | -2.40216 |
| H            | -5.14637 | -0.89828 | -2.62313     | -5.78782 | 0.69242  | -1.47124 |
| H            | -0.93121 | -0.17365 | 2.95486      | -0.73385 | 0.21371  | 3.06543  |
| H            | 0.7427   | 0.14695  | 2.47483      | 0.95882  | 0.32422  | 2.5533   |
| H            | 0.37582  | -1.25654 | 3.46121      | 0.46689  | -0.94494 | 3.66014  |
| H            | -1.66497 | 4.10802  | -1.80705     | -1.14047 | 3.99447  | -2.1885  |

|              |          |          |              |          |          |          |
|--------------|----------|----------|--------------|----------|----------|----------|
| H            | 0.09134  | 4.32717  | -1.82535     | 0.62559  | 4.10155  | -2.23617 |
| H            | -0.62332 | 2.83261  | -2.45744     | -0.18427 | 2.58967  | -2.68629 |
| H            | 5.1081   | -3.09564 | -2.77915     | 2.9693   | -4.33542 | -3.02134 |
| H            | 5.55294  | -3.18081 | -1.05495     | 4.3325   | -3.40774 | -2.32718 |
| H            | 4.26107  | -4.21957 | -1.66808     | 3.59853  | -4.71268 | -1.39041 |
| H            | 3.25185  | -0.87821 | 1.93492      | 3.33204  | -0.9073  | 2.01856  |
| H            | 3.65108  | 1.80282  | -1.06697     | 4.04454  | 1.45878  | -1.20414 |
| H            | 2.11388  | 0.96212  | -1.14887     | 2.45344  | 0.71918  | -1.24902 |
| H            | 2.60704  | 3.54763  | 0.43515      | 3.11938  | 3.4006   | 0.09518  |
| H            | 1.93452  | 3.47358  | -1.18353     | 2.42584  | 3.21435  | -1.50611 |
| H            | 4.37529  | 0.99446  | 2.52191      | 4.69244  | 0.87328  | 2.43063  |
| H            | 4.78233  | 2.15467  | 1.23802      | 3.87658  | 2.37288  | 1.96636  |
| H            | 3.35076  | 2.40632  | 2.22855      | 5.25221  | 1.80953  | 1.02602  |
| Con f. 1- 3c |          |          | Con f. 1- 3d |          |          |          |
| C            | 0.22298  | 2.10886  | -0.57766     | -1.44928 | 1.93969  | -0.87441 |
| C            | 1.34419  | -2.16432 | 0.66446      | -1.01859 | -2.5648  | 0.9214   |
| C            | 2.37781  | -1.17764 | 0.09491      | -2.05733 | -1.46606 | 1.23423  |
| C            | -0.98752 | -1.45599 | 0.28488      | 1.25253  | -1.81654 | 0.31522  |
| C            | -2.34501 | 2.21694  | -1.02634     | 1.04246  | 1.57414  | -1.34271 |
| C            | -2.39555 | 0.76669  | -1.56713     | 1.76959  | 1.2387   | -0.02358 |
| C            | -3.00261 | -0.23355 | -0.63649     | 2.76158  | 0.131    | -0.13029 |
| C            | -2.28551 | -0.76332 | 0.5799       | 2.33941  | -1.26064 | -0.54808 |
| C            | 0.06392  | -1.49618 | 1.11767      | 0.02283  | -2.16026 | -0.09847 |
| C            | -1.09954 | 2.68454  | -0.28381     | -0.11139 | 2.52673  | -1.08855 |
| C            | -4.21828 | -0.80835 | -0.71935     | 4.07377  | 0.12384  | 0.16981  |
| C            | -4.36564 | -1.73547 | 0.41252      | 4.57462  | -1.24744 | -0.01149 |
| O            | -3.23584 | -1.71315 | 1.16818      | 3.55501  | -2.05598 | -0.41771 |
| C            | -5.32136 | -0.64208 | -1.71021     | 4.98365  | 1.21176  | 0.63356  |
| O            | -0.48314 | 1.74349  | 0.63856      | -1.11344 | 2.56547  | -2.14221 |
| O            | -5.31494 | -2.4479  | 0.70328      | 5.70304  | -1.6825  | 0.1549   |
| C            | 0.05976  | -0.90657 | 2.50405      | -0.41324 | -2.15652 | -1.5431  |
| C            | -1.23492 | 4.0915   | 0.2553       | 0.2657   | 3.88864  | -0.5549  |
| O            | 3.52504  | -2.03998 | -0.25108     | -2.73529 | -1.08441 | 0.00458  |
| C            | 4.29941  | -1.68472 | -1.28752     | -3.75637 | -1.84721 | -0.42147 |
| O            | 4.08776  | -0.71532 | -1.99929     | -4.16412 | -2.82784 | 0.17982  |
| C            | 5.46031  | -2.62571 | -1.4468      | -4.30591 | -1.33544 | -1.72097 |
| C            | 2.82896  | -0.14623 | 1.08125      | -1.43852 | -0.25757 | 1.88744  |
| C            | 2.94483  | 1.17919  | 0.89723      | -1.80507 | 1.03491  | 1.8873   |
| C            | 2.74617  | 1.89867  | -0.41736     | -2.97309 | 1.62213  | 1.12539  |
| C            | 1.53257  | 2.8478   | -0.4706      | -2.54665 | 2.55514  | -0.03617 |
| C            | 3.32829  | 2.06279  | 2.05683      | -1.01168 | 2.03312  | 2.69397  |
| H            | 0.25891  | 1.29292  | -1.29925     | -1.51149 | 0.85592  | -0.95775 |
| H            | 1.8089   | -2.69549 | 1.50325      | -1.56361 | -3.44673 | 0.57037  |
| H            | 1.12864  | -2.89804 | -0.11801     | -0.53967 | -2.8275  | 1.86981  |
| H            | 1.99876  | -0.73442 | -0.82475     | -2.81248 | -1.90372 | 1.8963   |
| H            | -0.9222  | -1.95059 | -0.68212     | 1.49557  | -1.8599  | 1.37535  |
| H            | -2.45918 | 2.89764  | -1.87783     | 1.74915  | 2.02081  | -2.05231 |
| H            | -3.21605 | 2.39235  | -0.38381     | 0.64716  | 0.66315  | -1.80086 |
| H            | -1.39591 | 0.42628  | -1.8539      | 1.01275  | 0.93502  | 0.71115  |
| H            | -2.98774 | 0.77591  | -2.48516     | 2.26212  | 2.13019  | 0.37052  |
| H            | -2.14827 | 0.03388  | 1.31262      | 2.06779  | -1.279   | -1.60648 |
| H            | -5.04933 | 0.05129  | -2.50831     | 4.46903  | 2.17328  | 0.68507  |
| H            | -5.5832  | -1.6059  | -2.16114     | 5.38876  | 0.98178  | 1.6257   |
| H            | -6.2253  | -0.26345 | -1.21924     | 5.83812  | 1.312    | -0.04517 |
| H            | -0.94442 | -0.67115 | 2.86003      | 0.42683  | -2.24953 | -2.23512 |
| H            | 0.66117  | 0.00673  | 2.54647      | -0.95385 | -1.23937 | -1.79643 |
| H            | 0.50752  | -1.61607 | 3.20883      | -1.0982  | -2.99009 | -1.7304  |

|              |          |          |          |          |          |          |
|--------------|----------|----------|----------|----------|----------|----------|
| H            | -0.36493 | 4.38604  | 0.84374  | -0.59832 | 4.554    | -0.51338 |
| H            | -1.35802 | 4.80529  | -0.56621 | 0.69858  | 3.82068  | 0.44731  |
| H            | -2.12114 | 4.16179  | 0.89549  | 1.01466  | 4.34534  | -1.21169 |
| H            | 5.97295  | -2.42549 | -2.3878  | -3.55162 | -1.45815 | -2.50516 |
| H            | 6.15664  | -2.47824 | -0.61425 | -5.20388 | -1.89252 | -1.98806 |
| H            | 5.11811  | -3.66335 | -1.41349 | -4.5315  | -0.26815 | -1.6438  |
| H            | 3.05911  | -0.54876 | 2.06704  | -0.58017 | -0.52534 | 2.50085  |
| H            | 3.64809  | 2.49948  | -0.59402 | -3.61032 | 0.83128  | 0.73548  |
| H            | 2.68117  | 1.19083  | -1.24563 | -3.58032 | 2.21282  | 1.82288  |
| H            | 1.52842  | 3.52393  | 0.38722  | -3.42046 | 2.73869  | -0.67258 |
| H            | 1.62746  | 3.47244  | -1.36815 | -2.23199 | 3.52581  | 0.3548   |
| H            | 3.56469  | 1.48002  | 2.95112  | -0.5995  | 2.82331  | 2.05649  |
| H            | 4.1947   | 2.68754  | 1.80631  | -1.65674 | 2.53202  | 3.429    |
| H            | 2.50985  | 2.74831  | 2.30929  | -0.18216 | 1.56198  | 3.22819  |
| Con f. 1- 3e |          |          |          |          |          |          |
| C            | 0.53122  | 2.80726  | 0.34812  |          |          |          |
| C            | 1.25055  | -2.13328 | 0.52738  |          |          |          |
| C            | 2.06487  | -1.04704 | -0.2038  |          |          |          |
| C            | -1.16985 | -1.70072 | 0.50753  |          |          |          |
| C            | -1.92064 | 2.06722  | 0.23129  |          |          |          |
| C            | -2.17348 | 0.93777  | -0.78832 |          |          |          |
| C            | -2.99884 | -0.17898 | -0.24501 |          |          |          |
| C            | -2.47182 | -1.05974 | 0.86745  |          |          |          |
| C            | -0.0021  | -1.55541 | 1.15291  |          |          |          |
| C            | -0.8148  | 2.99837  | -0.2283  |          |          |          |
| C            | -4.20759 | -0.62716 | -0.63053 |          |          |          |
| C            | -4.53262 | -1.81174 | 0.18006  |          |          |          |
| O            | -3.51028 | -2.06821 | 1.04487  |          |          |          |
| C            | -5.15144 | -0.13574 | -1.67633 |          |          |          |
| O            | -0.32542 | 3.8799   | 0.82017  |          |          |          |
| O            | -5.52979 | -2.51468 | 0.14829  |          |          |          |
| C            | 0.18162  | -0.82158 | 2.45288  |          |          |          |
| C            | -1.02247 | 3.66239  | -1.56892 |          |          |          |
| O            | 2.9002   | -1.66418 | -1.25964 |          |          |          |
| C            | 3.92803  | -2.45573 | -0.91866 |          |          |          |
| O            | 4.22816  | -2.7375  | 0.23095  |          |          |          |
| C            | 4.66313  | -2.94027 | -2.13801 |          |          |          |
| C            | 2.87614  | -0.16291 | 0.69582  |          |          |          |
| C            | 3.1328   | 1.14254  | 0.50911  |          |          |          |
| C            | 2.6694   | 1.94928  | -0.68403 |          |          |          |
| C            | 1.83165  | 3.19094  | -0.31459 |          |          |          |
| C            | 3.94997  | 1.8967   | 1.52691  |          |          |          |
| H            | 0.62627  | 2.00188  | 1.07852  |          |          |          |
| H            | 1.87532  | -2.61355 | 1.2854   |          |          |          |
| H            | 0.9754   | -2.88752 | -0.21558 |          |          |          |
| H            | 1.37302  | -0.46037 | -0.80837 |          |          |          |
| H            | -1.19481 | -2.26741 | -0.42224 |          |          |          |
| H            | -2.84445 | 2.63959  | 0.37731  |          |          |          |
| H            | -1.64029 | 1.64722  | 1.20188  |          |          |          |
| H            | -1.20405 | 0.51885  | -1.08916 |          |          |          |
| H            | -2.64315 | 1.34191  | -1.68791 |          |          |          |
| H            | -2.41082 | -0.50645 | 1.80775  |          |          |          |
| H            | -4.76668 | 0.75322  | -2.18006 |          |          |          |
| H            | -5.33327 | -0.91121 | -2.42917 |          |          |          |
| H            | -6.12189 | 0.1116   | -1.23135 |          |          |          |
| H            | -0.75669 | -0.48598 | 2.89735  |          |          |          |
| H            | 0.83017  | 0.05065  | 2.32101  |          |          |          |

|              |          |          |              |          |          |          |
|--------------|----------|----------|--------------|----------|----------|----------|
| H            | 0.68669  | -1.47475 | 3.17488      |          |          |          |
| H            | -2.03003 | 4.08912  | -1.62353     |          |          |          |
| H            | -0.30381 | 4.46802  | -1.72768     |          |          |          |
| H            | -0.91876 | 2.94007  | -2.3848      |          |          |          |
| H            | 5.45352  | -3.63042 | -1.84307     |          |          |          |
| H            | 3.96846  | -3.43501 | -2.82299     |          |          |          |
| H            | 5.09663  | -2.08508 | -2.66639     |          |          |          |
| H            | 3.29481  | -0.64948 | 1.57227      |          |          |          |
| H            | 3.56184  | 2.29651  | -1.22107     |          |          |          |
| H            | 2.10785  | 1.32911  | -1.38737     |          |          |          |
| H            | 2.397    | 3.83086  | 0.37219      |          |          |          |
| H            | 1.65144  | 3.78145  | -1.21616     |          |          |          |
| H            | 4.3801   | 1.22428  | 2.27383      |          |          |          |
| H            | 4.76572  | 2.44892  | 1.04396      |          |          |          |
| H            | 3.33927  | 2.63834  | 2.05566      |          |          |          |
| Con f. 1- 4a |          |          | Con f. 1- 4b |          |          |          |
| C            | -0.64298 | 1.55189  | 1.65773      | -0.46941 | 1.72034  | 1.57209  |
| C            | 0.50746  | 2.53557  | 1.58565      | 0.74631  | 2.62018  | 1.47372  |
| C            | 0.90999  | 3.09512  | 0.20734      | 1.20411  | 3.08928  | 0.07942  |
| C            | 1.83297  | 2.17717  | -0.54101     | 2.05053  | 2.06614  | -0.62181 |
| C            | -2.47592 | -1.19713 | 0.66032      | -2.50383 | -0.87945 | 0.70368  |
| C            | -2.6256  | 0.33241  | 0.63612      | -2.55865 | 0.65819  | 0.60317  |
| C            | -1.36225 | 1.16222  | 0.59544      | -1.24285 | 1.39468  | 0.52717  |
| C            | -0.53317 | -1.48962 | -1.02143     | -0.6019  | -1.40406 | -0.96579 |
| C            | 2.76496  | 0.65714  | -2.23421     | 2.86221  | 0.40586  | -2.24485 |
| C            | 2.38166  | -0.83648 | -2.05249     | 2.35884  | -1.04493 | -2.01438 |
| C            | 1.94645  | -1.13023 | -0.65107     | 1.89997  | -1.25477 | -0.60571 |
| C            | 0.56696  | -1.39768 | -0.26415     | 0.50344  | -1.38759 | -0.21061 |
| C            | -1.93234 | -1.8932  | -0.60561     | -2.03381 | -1.65831 | -0.54267 |
| C            | 1.69374  | 1.6095   | -1.74824     | 1.8697   | 1.46034  | -1.80483 |
| C            | 2.69985  | -1.12358 | 0.48119      | 2.65422  | -1.27744 | 0.52582  |
| C            | 1.80453  | -1.36525 | 1.60997      | 1.74495  | -1.40752 | 1.66136  |
| O            | 0.52527  | -1.56332 | 1.11932      | 0.45141  | -1.50476 | 1.17721  |
| C            | -0.91558 | 1.06617  | 3.05996      | -0.74472 | 1.25559  | 2.98112  |
| C            | 4.15742  | -0.87509 | 0.67301      | 4.12857  | -1.14903 | 0.708    |
| C            | 0.51043  | 1.7921   | -2.66099     | 0.71069  | 1.70078  | -2.73481 |
| O            | 2.02207  | -1.40395 | 2.80926      | 1.96186  | -1.43357 | 2.86107  |
| O            | -2.81928 | -1.65769 | -1.71394     | -2.89199 | -1.35212 | -1.65768 |
| C            | -1.93799 | -3.41471 | -0.38538     | -2.19287 | -3.16595 | -0.29447 |
| O            | -3.45676 | 0.65242  | -0.49921     | -3.30762 | 1.09295  | -0.56032 |
| C            | -3.95634 | 1.98393  | -0.49901     | -4.72207 | 0.99479  | -0.40831 |
| H            | 0.23481  | 3.37778  | 2.2397       | 0.5284   | 3.50605  | 2.08979  |
| H            | 1.39122  | 2.08504  | 2.06317      | 1.59087  | 2.12758  | 1.97938  |
| H            | 1.44218  | 4.04014  | 0.389        | 1.81429  | 3.99156  | 0.23081  |
| H            | 0.0185   | 3.3533   | -0.37231     | 0.34388  | 3.40107  | -0.52048 |
| H            | 2.74777  | 1.94615  | 0.00857      | 2.94104  | 1.78425  | -0.05616 |
| H            | -3.47259 | -1.61894 | 0.83668      | -3.51165 | -1.24342 | 0.93522  |
| H            | -1.85302 | -1.46084 | 1.51752      | -1.87237 | -1.13637 | 1.55655  |
| H            | -3.19538 | 0.59321  | 1.5396       | -3.1085  | 1.00151  | 1.48981  |
| H            | -1.07885 | 1.49119  | -0.39923     | -0.97851 | 1.72807  | -0.47121 |
| H            | -0.40219 | -1.35718 | -2.09007     | -0.45905 | -1.32218 | -2.03794 |
| H            | 2.97507  | 0.81869  | -3.29944     | 3.09177  | 0.51131  | -3.31314 |
| H            | 3.69488  | 0.84288  | -1.68747     | 3.80055  | 0.53531  | -1.69638 |
| H            | 3.25422  | -1.45187 | -2.30118     | 3.18055  | -1.73565 | -2.23708 |
| H            | 1.58931  | -1.10747 | -2.75493     | 1.5502   | -1.27658 | -2.71236 |
| H            | -1.86245 | 0.52873  | 3.15632      | -1.7306  | 0.79933  | 3.10243  |
| H            | -0.11628 | 0.38357  | 3.38106      | 0.00342  | 0.51141  | 3.28704  |

|              |          |          |              |          |          |          |
|--------------|----------|----------|--------------|----------|----------|----------|
| H            | -0.92148 | 1.90212  | 3.7719       | -0.666   | 2.0909   | 3.6896   |
| H            | 4.70666  | -0.98671 | -0.26577     | 4.66392  | -1.36779 | -0.22007 |
| H            | 4.33595  | 0.14007  | 1.05176      | 4.39867  | -0.13233 | 1.02312  |
| H            | 4.57533  | -1.57178 | 1.40869      | 4.48302  | -1.83329 | 1.48712  |
| H            | -0.01623 | 0.84152  | -2.81774     | 0.11424  | 0.78809  | -2.86265 |
| H            | 0.83815  | 2.13442  | -3.65233     | 1.07132  | 1.98038  | -3.73441 |
| H            | -0.21423 | 2.51549  | -2.27916     | 0.04069  | 2.49058  | -2.38656 |
| H            | -3.08314 | -0.71676 | -1.65434     | -2.99732 | -0.37762 | -1.64503 |
| H            | -1.61367 | -3.92835 | -1.29671     | -1.90594 | -3.72881 | -1.1892  |
| H            | -1.26206 | -3.68915 | 0.42974      | -1.56081 | -3.48751 | 0.53857  |
| H            | -2.95193 | -3.7488  | -0.13821     | -3.2388  | -3.39273 | -0.0592  |
| H            | -3.15025 | 2.72477  | -0.5724      | -5.05776 | 1.55937  | 0.47185  |
| H            | -4.61096 | 2.07679  | -1.36939     | -5.16437 | 1.43117  | -1.30792 |
| H            | -4.53518 | 2.18077  | 0.41461      | -5.05498 | -0.04627 | -0.31749 |
| Con f. 1- 4c |          |          | Con f. 1- 4d |          |          |          |
| C            | 1.04104  | 2.07877  | -1.31877     | -1.31544 | 2.13247  | 0.82408  |
| C            | -0.25297 | 2.7174   | -1.76084     | -0.50318 | 3.22716  | 0.16674  |
| C            | -0.98903 | 3.46785  | -0.61726     | 1.01845  | 3.14772  | 0.41186  |
| C            | -1.84107 | 2.55492  | 0.22058      | 1.64081  | 1.98234  | -0.31409 |
| C            | 2.32036  | -1.50928 | -0.87421     | -2.53275 | -1.21579 | 0.51428  |
| C            | 2.44509  | 0.02646  | -0.86748     | -3.0096  | 0.23954  | 0.58624  |
| C            | 1.16859  | 0.74562  | -1.23698     | -2.05042 | 1.28574  | 0.08505  |
| C            | 0.46472  | -1.58701 | 0.91221      | -0.55561 | -1.23824 | -1.09905 |
| C            | -2.57177 | 1.08137  | 2.05763      | 3.4216   | 0.6829   | -1.5201  |
| C            | -2.22944 | -0.42856 | 2.09398      | 2.44107  | -0.47055 | -1.7825  |
| C            | -1.99376 | -1.00992 | 0.73451      | 1.93072  | -1.18163 | -0.56386 |
| C            | -0.71033 | -1.52676 | 0.27554      | 0.52243  | -1.50318 | -0.34729 |
| C            | 1.77439  | -2.16664 | 0.41792      | -1.98157 | -1.6948  | -0.85123 |
| C            | -1.53714 | 1.95291  | 1.38096      | 2.90306  | 1.88242  | -0.75586 |
| C            | -2.88057 | -1.14016 | -0.28839     | 2.63569  | -1.68239 | 0.48758  |
| C            | -2.17361 | -1.74267 | -1.41702     | 1.68467  | -2.31696 | 1.39764  |
| O            | -0.8587  | -1.97408 | -1.03687     | 0.41472  | -2.19788 | 0.85942  |
| C            | 2.16062  | 3.03435  | -0.97852     | -1.23479 | 2.08466  | 2.32842  |
| C            | -4.32436 | -0.77582 | -0.37374     | 4.0991   | -1.66858 | 0.78683  |
| C            | -0.20963 | 2.08123  | 2.08303      | 3.9501   | 2.94772  | -0.54608 |
| O            | -2.55909 | -2.04456 | -2.53167     | 1.85531  | -2.88835 | 2.46025  |
| O            | 2.7437   | -2.00814 | 1.47097      | -2.77924 | -1.19932 | -1.9442  |
| C            | 1.63263  | -3.67921 | 0.21087      | -2.03345 | -3.23168 | -0.91498 |
| O            | 2.92289  | 0.50819  | 0.41885      | -4.23284 | 0.2771   | -0.19256 |
| C            | 4.34434  | 0.61537  | 0.49484      | -4.94356 | 1.50756  | -0.10288 |
| H            | -0.02717 | 3.43937  | -2.55814     | -0.69193 | 3.23214  | -0.91367 |
| H            | -0.92655 | 1.96424  | -2.18676     | -0.85993 | 4.1905   | 0.55958  |
| H            | -1.63991 | 4.22697  | -1.06894     | 1.20492  | 3.07773  | 1.49338  |
| H            | -0.25647 | 4.009    | -0.00839     | 1.46979  | 4.09329  | 0.09151  |
| H            | -2.82847 | 2.3537   | -0.19869     | 0.95949  | 1.15496  | -0.49138 |
| H            | 3.30895  | -1.9528  | -1.03391     | -3.39242 | -1.84284 | 0.7796   |
| H            | 1.69923  | -1.79672 | -1.72867     | -1.76872 | -1.37058 | 1.2787   |
| H            | 3.21135  | 0.29346  | -1.60973     | -3.28144 | 0.44159  | 1.62961  |
| H            | 0.32468  | 0.12485  | -1.52154     | -2.01319 | 1.37258  | -1.00055 |
| H            | 0.4827   | -1.21846 | 1.93176      | -0.39285 | -0.69731 | -2.02467 |
| H            | -2.70214 | 1.40463  | 3.09989      | 3.78414  | 1.03124  | -2.49863 |
| H            | -3.53776 | 1.20995  | 1.55945      | 4.31545  | 0.30114  | -1.01135 |
| H            | -3.07037 | -0.95488 | 2.56221      | 2.95539  | -1.21049 | -2.41049 |
| H            | -1.35887 | -0.59958 | 2.73228      | 1.5985   | -0.10191 | -2.37435 |
| H            | 3.13935  | 2.63148  | -1.25961     | -2.02911 | 1.48569  | 2.78135  |
| H            | 2.02625  | 3.98999  | -1.49779     | -0.27891 | 1.64952  | 2.64947  |
| H            | 2.19951  | 3.24935  | 0.09626      | -1.28007 | 3.09547  | 2.7533   |

|   |              |          |          |              |          |          |
|---|--------------|----------|----------|--------------|----------|----------|
| H | -4.46046     | 0.18114  | -0.89443 | 4.40332      | -0.72297 | 1.25347  |
| H | -4.87768     | -1.53315 | -0.94029 | 4.34551      | -2.47414 | 1.48588  |
| H | -4.77171     | -0.68564 | 0.6199   | 4.69669      | -1.80113 | -0.12013 |
| H | 0.41156      | 2.87537  | 1.66086  | 3.56443      | 3.83417  | -0.03693 |
| H | 0.36496      | 1.14945  | 2.01459  | 4.38332      | 3.26545  | -1.50486 |
| H | -0.35331     | 2.28824  | 3.15219  | 4.78279      | 2.55446  | 0.05408  |
| H | 2.87865      | -1.04143 | 1.5271   | -3.47669     | -0.62152 | -1.57101 |
| H | 1.32424      | -4.15783 | 1.14626  | -1.64644     | -3.58012 | -1.87851 |
| H | 0.88703      | -3.89831 | -0.55774 | -1.43721     | -3.68258 | -0.11642 |
| H | 2.5955       | -4.10192 | -0.09688 | -3.07242     | -3.5639  | -0.81468 |
| H | 4.8348       | -0.35797 | 0.3645   | -5.87035     | 1.37677  | -0.66737 |
| H | 4.72683      | 1.3137   | -0.26042 | -5.18471     | 1.73792  | 0.94433  |
| H | 4.57634      | 1.00115  | 1.4913   | -4.37482     | 2.34384  | -0.52732 |
|   | Con f. 1- 4e |          |          | Con f. 1- 4f |          |          |
| C | -0.61678     | 1.62526  | 1.42466  | -0.47652     | 1.71302  | 1.42202  |
| C | 0.66693      | 2.41902  | 1.28122  | 0.85995      | 2.42037  | 1.3056   |
| C | 1.10897      | 2.85094  | -0.13197 | 1.34866      | 2.84212  | -0.09518 |
| C | 1.6151       | 1.68961  | -0.94027 | 1.7658       | 1.65882  | -0.92214 |
| C | -2.84382     | -0.83005 | 0.43285  | -2.82268     | -0.56764 | 0.4849   |
| C | -2.80252     | 0.70422  | 0.49683  | -2.71115     | 0.96965  | 0.46282  |
| C | -1.44547     | 1.36207  | 0.40379  | -1.31892     | 1.5483   | 0.39278  |
| C | -0.86956     | -1.29925 | -1.16063 | -0.91425     | -1.19989 | -1.1285  |
| C | 3.26096      | 0.08178  | -1.91895 | 3.28187      | -0.03617 | -1.96066 |
| C | 2.18699      | -1.02205 | -1.94154 | 2.13976      | -1.07006 | -1.96522 |
| C | 1.60741      | -1.35764 | -0.59668 | 1.56836      | -1.37832 | -0.61036 |
| C | 0.1745       | -1.47717 | -0.3412  | 0.13599      | -1.42073 | -0.32767 |
| C | -2.34149     | -1.50946 | -0.85952 | -2.38732     | -1.3259  | -0.78839 |
| C | 2.88807      | 1.37973  | -1.22832 | 3.0088       | 1.27746  | -1.25224 |
| C | 2.25512      | -1.58583 | 0.57888  | 2.22488      | -1.64152 | 0.55297  |
| C | 1.24182      | -1.82481 | 1.60352  | 1.21989      | -1.82041 | 1.59775  |
| O | -0.00476     | -1.78343 | 1.00757  | -0.03368     | -1.7104  | 1.02569  |
| C | -0.87979     | 1.16837  | 2.83811  | -0.77606     | 1.2331   | 2.82064  |
| C | 3.70923      | -1.57425 | 0.91814  | 3.68359      | -1.70587 | 0.86559  |
| C | 4.08057      | 2.23662  | -0.8856  | 4.26002      | 2.06127  | -0.94612 |
| O | 1.34864      | -2.02799 | 2.80132  | 1.33813      | -2.02498 | 2.79421  |
| O | -3.10508     | -1.05037 | -1.98896 | -3.1534      | -0.8624  | -1.91535 |
| C | -2.59789     | -3.02262 | -0.76909 | -2.72423     | -2.81679 | -0.639   |
| O | -3.65086     | 1.18254  | -0.56892 | -3.41469     | 1.53995  | -0.66969 |
| C | -3.96997     | 2.56592  | -0.48046 | -4.83341     | 1.55572  | -0.52794 |
| H | 0.55237      | 3.32043  | 1.90366  | 0.80454      | 3.31711  | 1.94269  |
| H | 1.48674      | 1.85232  | 1.7465   | 1.63161      | 1.7876   | 1.76829  |
| H | 1.87972      | 3.61907  | -0.01969 | 2.1783       | 3.54236  | 0.03824  |
| H | 0.26387      | 3.33244  | -0.64312 | 0.55075      | 3.40114  | -0.60331 |
| H | 0.84348      | 0.99142  | -1.24638 | 0.94646      | 1.00843  | -1.2094  |
| H | -3.89055     | -1.13066 | 0.56089  | -3.87072     | -0.83329 | 0.66607  |
| H | -2.28344     | -1.21751 | 1.28569  | -2.25227     | -0.93349 | 1.34101  |
| H | -3.28097     | 0.98401  | 1.44586  | -3.21089     | 1.32919  | 1.3725   |
| H | -1.17676     | 1.67313  | -0.60232 | -1.03894     | 1.89298  | -0.59874 |
| H | -0.64859     | -1.05471 | -2.19421 | -0.7032      | -0.97675 | -2.169   |
| H | 3.55782      | 0.28639  | -2.95816 | 3.56512      | 0.15818  | -3.00562 |
| H | 4.16583      | -0.30796 | -1.43813 | 4.17232      | -0.48552 | -1.50568 |
| H | 2.64034      | -1.92922 | -2.36258 | 2.52501      | -2.0008  | -2.40236 |
| H | 1.38084      | -0.74247 | -2.62545 | 1.33917      | -0.73324 | -2.62948 |
| H | -1.89141     | 0.78091  | 2.98467  | -1.80871     | 0.89891  | 2.95098  |
| H | -0.17871     | 0.36848  | 3.1143   | -0.12134     | 0.39164  | 3.0856   |
| H | -0.71882     | 1.98795  | 3.55097  | -0.57894     | 2.02699  | 3.55352  |
| H | 4.06937      | -0.55079 | 1.08413  | 4.10082      | -0.70165 | 1.01398  |

|   |             |          |          |             |          |          |
|---|-------------|----------|----------|-------------|----------|----------|
| H | 3.88454     | -2.13833 | 1.83963  | 3.84517     | -2.26979 | 1.78965  |
| H | 4.31301     | -2.01545 | 0.11964  | 4.24787     | -2.18668 | 0.06108  |
| H | 4.72141     | 1.7335   | -0.14813 | 4.89982     | 1.51349  | -0.2403  |
| H | 3.80957     | 3.21525  | -0.48223 | 4.05977     | 3.04785  | -0.52163 |
| H | 4.70403     | 2.40022  | -1.7758  | 4.85667     | 2.20206  | -1.85836 |
| H | -3.28642    | -0.1006  | -1.83646 | -3.18568    | 0.11366  | -1.83163 |
| H | -2.29747    | -3.51116 | -1.70218 | -2.46389    | -3.35565 | -1.55636 |
| H | -2.02831    | -3.46336 | 0.05432  | -2.16869    | -3.2566  | 0.19419  |
| H | -3.66553    | -3.20695 | -0.6057  | -3.79794    | -2.93589 | -0.45623 |
| H | -3.07899    | 3.20037  | -0.56916 | -5.12549    | 2.07136  | 0.39666  |
| H | -4.65246    | 2.78687  | -1.30516 | -5.22659    | 2.10491  | -1.38771 |
| H | -4.46839    | 2.78774  | 0.47387  | -5.25914    | 0.54508  | -0.52751 |
|   | Con f.2- 4a |          |          | Con f.2- 4b |          |          |
| C | 1.54176     | 1.8584   | -0.62837 | -1.21099    | 2.1753   | 0.32818  |
| C | 0.61355     | 2.67917  | -1.49798 | -0.02021    | 2.80241  | 1.02249  |
| C | -0.49197    | 3.46206  | -0.74922 | 1.1554      | 3.17816  | 0.09304  |
| C | -1.65589    | 2.60516  | -0.33989 | 1.78405     | 1.96937  | -0.54206 |
| C | 2.24675     | -1.7511  | 0.14204  | -2.76404    | -1.21812 | 0.036    |
| C | 2.74269     | -0.35664 | -0.24023 | -2.92786    | 0.28539  | 0.26214  |
| C | 1.70703     | 0.54427  | -0.85388 | -1.67967    | 0.98149  | 0.72772  |
| C | 0.01144     | -1.18178 | 1.31788  | -0.54277    | -1.22233 | -1.27568 |
| C | -3.25246    | 1.36187  | 1.07762  | 3.59601     | 0.39667  | -1.27399 |
| C | -2.97907    | -0.12132 | 1.42517  | 2.56215     | -0.69391 | -1.59247 |
| C | -2.28961    | -0.85372 | 0.31748  | 1.8418      | -1.26189 | -0.40375 |
| C | -0.90461    | -1.30768 | 0.35024  | 0.39946     | -1.48884 | -0.36284 |
| C | 1.37154     | -1.82807 | 1.40725  | -1.99838    | -1.62276 | -1.2391  |
| C | -2.00496    | 2.19439  | 0.88897  | 3.08815     | 1.66463  | -0.61749 |
| C | -2.81922    | -1.22617 | -0.8786  | 2.36291     | -1.72074 | 0.76729  |
| C | -1.77932    | -1.92823 | -1.62671 | 1.25769     | -2.2342  | 1.57482  |
| O | -0.63435    | -1.97209 | -0.84602 | 0.08351     | -2.08839 | 0.856    |
| C | 2.29267     | 2.63927  | 0.42201  | -1.80927    | 2.99432  | -0.78798 |
| C | -4.18962    | -1.02755 | -1.43235 | 3.77063     | -1.7801  | 1.26339  |
| C | -1.22785    | 2.49491  | 2.14486  | 4.201       | 2.53666  | -0.09161 |
| O | -1.7964     | -2.43843 | -2.73246 | 1.24591     | -2.73558 | 2.6849   |
| O | 2.02021     | -1.13963 | 2.49698  | -2.57533    | -0.96461 | -2.38622 |
| C | 1.16399     | -3.30566 | 1.79302  | -2.09283    | -3.14763 | -1.43156 |
| O | 3.78791     | -0.6051  | -1.21512 | -3.9453     | 0.38613  | 1.28913  |
| C | 4.63814     | 0.51061  | -1.42846 | -4.49065    | 1.69     | 1.4157   |
| H | 0.15143     | 2.04004  | -2.26002 | 0.34528     | 2.13134  | 1.80886  |
| H | 1.2333      | 3.41366  | -2.03412 | -0.36152    | 3.724    | 1.51756  |
| H | -0.86412    | 4.23778  | -1.43248 | 1.88511     | 3.74708  | 0.67649  |
| H | -0.05714    | 3.98825  | 0.10595  | 0.78625     | 3.86188  | -0.68521 |
| H | -2.29324    | 2.29149  | -1.169   | 1.06621     | 1.27265  | -0.96945 |
| H | 3.1374      | -2.36154 | 0.33602  | -3.77219    | -1.64236 | -0.04972 |
| H | 1.72217     | -2.20745 | -0.70099 | -2.29442    | -1.67762 | 0.90974  |
| H | 3.19897     | 0.10443  | 0.64167  | -3.31974    | 0.7381   | -0.65499 |
| H | 1.118       | 0.07716  | -1.64365 | -1.16519    | 0.47326  | 1.54416  |
| H | -0.29845    | -0.65433 | 2.21372  | -0.21826    | -0.75106 | -2.19713 |
| H | -3.85352    | 1.7818   | 1.89564  | 4.09886     | 0.66357  | -2.21555 |
| H | -3.86776    | 1.40141  | 0.17267  | 4.38763     | -0.02398 | -0.64328 |
| H | -3.94156    | -0.61027 | 1.61818  | 3.08716     | -1.51975 | -2.09141 |
| H | -2.39815    | -0.19038 | 2.34868  | 1.83691     | -0.31657 | -2.31848 |
| H | 1.64103     | 2.88989  | 1.26795  | -1.14766    | 3.00357  | -1.6642  |
| H | 3.15324     | 2.10002  | 0.82204  | -2.78322    | 2.62616  | -1.11558 |
| H | 2.65127     | 3.59046  | 0.00802  | -1.92843    | 4.03986  | -0.47481 |
| H | -4.91336    | -0.82226 | -0.63849 | 4.46984     | -2.02916 | 0.4596   |
| H | -4.2133     | -0.18544 | -2.13651 | 4.08483     | -0.82199 | 1.69625  |

|             |          |          |             |          |          |          |
|-------------|----------|----------|-------------|----------|----------|----------|
| H           | -4.51451 | -1.91787 | -1.98226    | 3.85812  | -2.53893 | 2.04747  |
| H           | -0.46195 | 3.25937  | 1.99563     | 3.85313  | 3.49274  | 0.30539  |
| H           | -1.89836 | 2.83611  | 2.94488     | 4.75713  | 2.02025  | 0.70332  |
| H           | -0.72343 | 1.5946   | 2.52065     | 4.92809  | 2.75024  | -0.8878  |
| H           | 2.88337  | -1.56823 | 2.63103     | -3.51077 | -1.22899 | -2.42251 |
| H           | 0.56128  | -3.3794  | 2.70392     | -1.57803 | -3.44423 | -2.35102 |
| H           | 0.65511  | -3.84722 | 0.9892      | -1.63824 | -3.67566 | -0.58773 |
| H           | 2.1351   | -3.78212 | 1.97488     | -3.14525 | -3.44776 | -1.50518 |
| H           | 5.15525  | 0.80316  | -0.50201    | -4.9661  | 2.01808  | 0.47889  |
| H           | 5.38272  | 0.20454  | -2.16963    | -5.25027 | 1.64099  | 2.20178  |
| H           | 4.09048  | 1.38116  | -1.81377    | -3.73118 | 2.43051  | 1.70064  |
| Con f.2- 4c |          |          | Con f.2- 4d |          |          |          |
| C           | -1.01039 | 1.73928  | 0.89075     | -0.78111 | 1.69661  | -1.02407 |
| C           | 0.05942  | 2.81403  | 0.85804     | 0.25433  | 2.77773  | -0.77134 |
| C           | 0.76272  | 3.11779  | -0.47922    | 0.68873  | 3.045    | 0.68267  |
| C           | 1.86069  | 2.13997  | -0.7876     | 1.50654  | 1.90802  | 1.22893  |
| C           | -2.45512 | -1.22194 | 0.25406     | -2.50655 | -1.08713 | 0.82136  |
| C           | -2.66234 | 0.18915  | -0.31131    | -2.56921 | 0.08782  | -0.16046 |
| C           | -1.48225 | 1.13811  | -0.21258    | -1.43792 | 1.07082  | -0.03405 |
| C           | -0.19597 | -1.75994 | -0.86543    | -0.07425 | -1.73954 | 0.7988   |
| C           | 3.19855  | 0.37487  | -1.85815    | 2.12741  | -0.06582 | 2.63372  |
| C           | 2.84313  | -1.0758  | -1.43309    | 2.93427  | -0.69185 | 1.47713  |
| C           | 2.1332   | -1.10516 | -0.11629    | 2.23552  | -0.85585 | 0.15595  |
| C           | 0.71569  | -1.40431 | 0.04718     | 0.88139  | -1.36487 | -0.05857 |
| C           | -1.62527 | -2.17836 | -0.62536    | -1.48157 | -2.20558 | 0.49911  |
| C           | 2.01159  | 1.3135   | -1.83365    | 1.27789  | 1.14788  | 2.30881  |
| C           | 2.6327   | -0.79105 | 1.10882     | 2.75441  | -0.55072 | -1.06549 |
| C           | 1.5326   | -0.86175 | 2.0674      | 1.74649  | -0.84986 | -2.07713 |
| O           | 0.39173  | -1.26677 | 1.39522     | 0.62963  | -1.35151 | -1.43737 |
| C           | -1.52431 | 1.47109  | 2.28409     | -1.01208 | 1.4407   | -2.49301 |
| C           | 4.00675  | -0.38431 | 1.51994     | 4.06598  | 0.03987  | -1.45832 |
| C           | 1.05342  | 1.19337  | -2.98923    | 0.15749  | 1.37201  | 3.29092  |
| O           | 1.49762  | -0.6255  | 3.26265     | 1.76544  | -0.71181 | -3.28728 |
| O           | -2.1969  | -2.25392 | -1.9477     | -1.6575  | -2.67165 | -0.84589 |
| C           | -1.62724 | -3.58249 | 0.00686     | -1.779   | -3.42062 | 1.3878   |
| O           | -3.83953 | 0.68397  | 0.36039     | -3.8186  | 0.74961  | 0.16345  |
| C           | -4.32965 | 1.90073  | -0.17962    | -4.24157 | 1.67357  | -0.82718 |
| H           | 0.82205  | 2.57148  | 1.61386     | 1.14888  | 2.54032  | -1.36669 |
| H           | -0.41303 | 3.73843  | 1.22421     | -0.13282 | 3.71298  | -1.20387 |
| H           | 1.21156  | 4.11706  | -0.38357    | -0.18527 | 3.26185  | 1.30425  |
| H           | 0.03007  | 3.1885   | -1.28869    | 1.29726  | 3.96091  | 0.67213  |
| H           | 2.63779  | 2.10862  | -0.02127    | 2.36003  | 1.65873  | 0.601    |
| H           | -3.45054 | -1.67381 | 0.35108     | -3.49789 | -1.55512 | 0.81877  |
| H           | -2.02079 | -1.17805 | 1.25417     | -2.32737 | -0.70898 | 1.83536  |
| H           | -2.91152 | 0.08885  | -1.37717    | -2.65262 | -0.30676 | -1.17944 |
| H           | -1.03302 | 1.38517  | -1.16823    | -1.21346 | 1.33794  | 0.99389  |
| H           | 0.14414  | -1.84939 | -1.89122    | 0.17118  | -1.69656 | 1.85246  |
| H           | 3.63463  | 0.32805  | -2.86444    | 2.8406   | 0.18124  | 3.43366  |
| H           | 3.97548  | 0.74998  | -1.1843     | 1.47439  | -0.82575 | 3.0782   |
| H           | 3.77261  | -1.65249 | -1.35911    | 3.28359  | -1.67845 | 1.80981  |
| H           | 2.23264  | -1.55403 | -2.20329    | 3.8351   | -0.09854 | 1.29865  |
| H           | -1.79396 | 2.41291  | 2.78185     | -0.07342 | 1.16951  | -2.99171 |
| H           | -2.39907 | 0.82191  | 2.29715     | -1.73624 | 0.64802  | -2.68917 |
| H           | -0.73635 | 1.00972  | 2.89498     | -1.3731  | 2.35478  | -2.98474 |
| H           | 4.74188  | -0.63228 | 0.7499      | 4.61406  | -0.63845 | -2.12418 |
| H           | 4.05739  | 0.69714  | 1.70311     | 3.91303  | 0.97556  | -2.01086 |
| H           | 4.29422  | -0.8827  | 2.45285     | 4.69605  | 0.2496   | -0.59122 |

|             |          |          |             |          |          |          |
|-------------|----------|----------|-------------|----------|----------|----------|
| H           | 0.26912  | 1.95395  | -2.97112    | 0.5502   | 1.41002  | 4.3168   |
| H           | 1.58923  | 1.28343  | -3.94399    | -0.39642 | 2.2964   | 3.11194  |
| H           | 0.56427  | 0.21011  | -2.99642    | -0.55541 | 0.53569  | 3.26369  |
| H           | -3.1079  | -2.57928 | -1.84498    | -1.1951  | -2.06566 | -1.44943 |
| H           | -1.07101 | -4.28205 | -0.62531    | -1.04371 | -4.21176 | 1.20734  |
| H           | -1.16654 | -3.56247 | 0.99943     | -1.74775 | -3.14642 | 2.44689  |
| H           | -2.65802 | -3.94387 | 0.10811     | -2.77638 | -3.8081  | 1.15538  |
| H           | -4.53836 | 1.80325  | -1.25632    | -5.19892 | 2.08237  | -0.49006 |
| H           | -5.26208 | 2.12824  | 0.34549     | -3.52749 | 2.49789  | -0.95525 |
| H           | -3.62582 | 2.73075  | -0.03493    | -4.38595 | 1.18015  | -1.80019 |
| Con f.2- 4e |          |          | Con f.2- 4f |          |          |          |
| C           | -2.15696 | 1.91581  | -0.23683    | 1.4298   | 2.11248  | -0.59747 |
| C           | -1.29333 | 3.15458  | -0.08171    | 0.2941   | 2.5982   | -1.4733  |
| C           | 0.00281  | 3.03313  | 0.73376     | -0.83658 | 3.3592   | -0.72878 |
| C           | 1.03813  | 2.22027  | 0.00371     | -1.88925 | 2.46015  | -0.13869 |
| C           | -2.1644  | -1.73817 | 0.25133     | 2.55106  | -0.81239 | 1.34943  |
| C           | -2.8774  | -0.41034 | 0.51564     | 2.86931  | 0.16968  | 0.2161   |
| C           | -1.98914 | 0.80324  | 0.49689     | 1.69313  | 0.79983  | -0.48222 |
| C           | -0.17681 | -1.10487 | -1.2212     | 0.13528  | -1.45493 | 1.17682  |
| C           | 3.2715   | 1.58233  | -0.93755    | -3.13801 | 1.09405  | 1.49399  |
| C           | 2.67732  | 0.30262  | -1.55173    | -2.80371 | -0.40938 | 1.66012  |
| C           | 2.25203  | -0.73409 | -0.55304    | -2.22826 | -0.99934 | 0.41096  |
| C           | 0.91761  | -1.32477 | -0.4797     | -0.84477 | -1.44445 | 0.26428  |
| C           | -1.48907 | -1.85017 | -1.13486    | 1.55421  | -1.96768 | 1.10991  |
| C           | 2.35122  | 2.4623   | -0.1167     | -1.95941 | 1.95854  | 1.10419  |
| C           | 3.01854  | -1.32883 | 0.40156     | -2.85095 | -1.18206 | -0.78341 |
| C           | 2.17971  | -2.29046 | 1.11272     | -1.86954 | -1.73149 | -1.71598 |
| O           | 0.91442  | -2.26658 | 0.55137     | -0.66534 | -1.88331 | -1.04608 |
| C           | -3.22355 | 2.07975  | -1.29206    | 2.24039  | 3.20925  | 0.04706  |
| C           | 4.45822  | -1.14676 | 0.75193     | -4.25589 | -0.90414 | -1.19921 |
| C           | 3.06754  | 3.62109  | 0.52944     | -0.9223  | 2.18635  | 2.1724   |
| O           | 2.4347   | -3.04118 | 2.03749     | -1.97053 | -2.04257 | -2.88873 |
| O           | -2.31272 | -1.24243 | -2.15124    | 1.72427  | -2.78539 | 2.3002   |
| C           | -1.26636 | -3.33013 | -1.49136    | 1.89229  | -2.8219  | -0.11103 |
| O           | -3.4546  | -0.56451 | 1.83222     | 3.68925  | -0.53321 | -0.74308 |
| C           | -4.45405 | 0.40273  | 2.11679     | 4.36864  | 0.33423  | -1.63788 |
| H           | -1.04411 | 3.53052  | -1.08513    | 0.72308  | 3.28188  | -2.22048 |
| H           | -1.92848 | 3.93443  | 0.36573     | -0.14188 | 1.75628  | -2.02387 |
| H           | -0.22373 | 2.58426  | 1.71196     | -1.32639 | 4.02233  | -1.45236 |
| H           | 0.37067  | 4.04182  | 0.94618     | -0.39875 | 4.01056  | 0.03461  |
| H           | 0.63131  | 1.34865  | -0.49631    | -2.69124 | 2.19003  | -0.82764 |
| H           | -2.91714 | -2.53188 | 0.33529     | 2.1922   | -0.22902 | 2.20535  |
| H           | -1.42117 | -1.91689 | 1.0335      | 3.49916  | -1.27396 | 1.65108  |
| H           | -3.69591 | -0.30694 | -0.20277    | 3.49454  | 0.94819  | 0.66984  |
| H           | -1.17772 | 0.75737  | 1.22092     | 1.05643  | 0.10322  | -1.02353 |
| H           | -0.10336 | -0.36397 | -2.00957    | -0.12865 | -1.0668  | 2.15587  |
| H           | 3.68102  | 2.18612  | -1.76114    | -3.55373 | 1.44237  | 2.44934  |
| H           | 4.14132  | 1.31802  | -0.32291    | -3.92827 | 1.19376  | 0.74333  |
| H           | 3.44842  | -0.14599 | -2.19137    | -3.72937 | -0.94026 | 1.91311  |
| H           | 1.84268  | 0.55789  | -2.21052    | -2.11864 | -0.54982 | 2.49992  |
| H           | -4.01372 | 1.32874  | -1.23897    | 3.12166  | 2.84492  | 0.57822  |
| H           | -3.68989 | 3.07029  | -1.21378    | 2.57422  | 3.92669  | -0.71476 |
| H           | -2.77453 | 2.02101  | -2.29333    | 1.63856  | 3.7787   | 0.76588  |
| H           | 5.04501  | -0.83504 | -0.11703    | -4.31788 | 0.02116  | -1.78695 |
| H           | 4.5871   | -0.38829 | 1.53495     | -4.63536 | -1.71379 | -1.83289 |
| H           | 4.87379  | -2.08429 | 1.13644     | -4.91502 | -0.79911 | -0.33329 |
| H           | 2.39579  | 4.30646  | 1.05175     | -0.18906 | 2.94571  | 1.89086  |

|             |          |          |             |          |          |          |
|-------------|----------|----------|-------------|----------|----------|----------|
| H           | 3.80643  | 3.25867  | 1.25813     | -1.39411 | 2.4958   | 3.11488  |
| H           | 3.62864  | 4.19838  | -0.21873    | -0.37089 | 1.26148  | 2.38511  |
| H           | -3.1522  | -1.73289 | -2.16966    | 1.11186  | -3.53756 | 2.21624  |
| H           | -0.77437 | -3.4143  | -2.46564    | 1.20963  | -3.67673 | -0.17268 |
| H           | -0.64603 | -3.82626 | -0.73963    | 1.82677  | -2.25958 | -1.04209 |
| H           | -2.23278 | -3.84612 | -1.53864    | 2.91384  | -3.19884 | -0.00464 |
| H           | -4.83024 | 0.18646  | 3.12115     | 4.98439  | -0.29709 | -2.28511 |
| H           | -4.05503 | 1.426    | 2.09747     | 3.67357  | 0.91391  | -2.25962 |
| H           | -5.28754 | 0.33975  | 1.4006      | 5.02095  | 1.03612  | -1.09604 |
| Con f.1- 5a |          |          | Con f.1- 5b |          |          |          |
| C           | 3.404    | 0.36466  | 0.14077     | 3.40629  | -0.55411 | -0.57287 |
| C           | 3.34548  | 1.83518  | -0.2124     | 3.57589  | 0.9012   | -0.96607 |
| C           | 2.00441  | 2.49503  | 0.16479     | 3.47453  | 1.9092   | 0.19403  |
| C           | 0.79662  | 1.82981  | -0.50263    | 2.08837  | 1.99801  | 0.85972  |
| C           | 1.90883  | -2.64769 | -1.08556    | 0.65535  | -3.0859  | -0.89797 |
| C           | 3.28768  | -2.05371 | -0.70962    | 2.16405  | -2.76723 | -0.89552 |
| C           | 3.31039  | -0.55746 | -0.82994    | 2.45195  | -1.31097 | -1.14314 |
| C           | -0.31072 | -1.77823 | -0.41286    | -1.23013 | -1.64486 | -0.23059 |
| C           | -0.93946 | 2.10791  | 1.38338     | -0.14004 | 1.57294  | -0.4568  |
| C           | -1.0479  | 0.59853  | 1.69094     | -1.1669  | 1.47604  | 0.70183  |
| C           | -1.93674 | -0.20249 | 0.78862     | -2.30721 | 0.5611   | 0.40231  |
| C           | -1.54872 | -1.61784 | 0.41955     | -2.2163  | -0.9279  | 0.64328  |
| C           | 0.81058  | -2.43196 | -0.0678     | -0.15632 | -2.35417 | 0.14949  |
| C           | -0.50755 | 2.44093  | -0.0277     | 1.00537  | 2.49208  | -0.10699 |
| C           | 3.51253  | 0.05452  | 1.61183     | 4.38355  | -1.06684 | 0.45729  |
| C           | -3.14736 | 0.07399  | 0.2641      | -3.5264  | 0.8586   | -0.08554 |
| C           | -3.60388 | -1.11582 | -0.4723     | -4.30861 | -0.38424 | -0.14631 |
| O           | -2.67553 | -2.10548 | -0.36609    | -3.5494  | -1.42271 | 0.30375  |
| C           | -4.02661 | 1.28112  | 0.35095     | -4.11992 | 2.16312  | -0.50258 |
| C           | -1.22221 | 3.25787  | -0.80791    | 1.06798  | 3.73115  | -0.60622 |
| O           | -4.6435  | -1.28738 | -1.08971    | -5.46236 | -0.55148 | -0.50983 |
| C           | 1.06481  | -3.03028 | 1.2908      | 0.31296  | -2.51296 | 1.57022  |
| O           | 0.98132  | 1.94736  | -1.91883    | 1.74606  | 0.7624   | 1.50649  |
| H           | 4.1481   | 2.37525  | 0.3091      | 4.57162  | 1.02299  | -1.41714 |
| H           | 3.51503  | 1.96511  | -1.28601    | 2.84487  | 1.16493  | -1.73962 |
| H           | 2.02088  | 3.5531   | -0.12623    | 3.73363  | 2.90424  | -0.18443 |
| H           | 1.86686  | 2.46437  | 1.25068     | 4.20883  | 1.6668   | 0.97124  |
| H           | 0.80329  | 0.76519  | -0.23911    | 2.16292  | 2.71887  | 1.68093  |
| H           | 2.03161  | -3.73343 | -1.21223    | 0.54103  | -4.16669 | -0.72825 |
| H           | 1.59918  | -2.24594 | -2.05769    | 0.24306  | -2.87467 | -1.89155 |
| H           | 4.02525  | -2.47785 | -1.40513    | 2.62493  | -3.37359 | -1.69    |
| H           | 3.57666  | -2.38766 | 0.29125     | 2.61121  | -3.10503 | 0.04365  |
| H           | 3.20065  | -0.19034 | -1.85235    | 1.8151   | -0.83801 | -1.89275 |
| H           | -0.39551 | -1.35402 | -1.41263    | -1.46789 | -1.57277 | -1.2914  |
| H           | -1.89256 | 2.60097  | 1.58978     | 0.22545  | 0.56898  | -0.69213 |
| H           | -0.21687 | 2.5224   | 2.09873     | -0.64972 | 1.9508   | -1.34938 |
| H           | -0.05201 | 0.1422   | 1.69036     | -0.64767 | 1.12264  | 1.5972   |
| H           | -1.42337 | 0.48876  | 2.71848     | -1.54907 | 2.48059  | 0.91085  |
| H           | -1.50908 | -2.23294 | 1.32363     | -2.06206 | -1.13729 | 1.70535  |
| H           | 2.6072   | 0.37184  | 2.14725     | 4.16232  | -0.65159 | 1.44831  |
| H           | 3.66137  | -1.00845 | 1.81519     | 4.37943  | -2.15579 | 0.54166  |
| H           | 4.34811  | 0.60687  | 2.06304     | 5.40422  | -0.752   | 0.2033   |
| H           | -3.78758 | 2.00377  | -0.43782    | -3.43392 | 2.99384  | -0.31742 |
| H           | -5.07295 | 0.98612  | 0.22135     | -4.36396 | 2.1527   | -1.57241 |
| H           | -3.92708 | 1.78842  | 1.31372     | -5.05544 | 2.35541  | 0.03675  |
| H           | -2.14858 | 3.7079   | -0.46086    | 0.3166   | 4.10239  | -1.29981 |
| H           | -0.89782 | 3.51124  | -1.81298    | 1.8654   | 4.42238  | -0.33957 |

|   |             |          |          |             |          |          |
|---|-------------|----------|----------|-------------|----------|----------|
| H | 0.17052     | -3.08239 | 1.91678  | -0.38313    | -2.10012 | 2.30411  |
| H | 1.47522     | -4.04323 | 1.19276  | 0.471       | -3.57427 | 1.80257  |
| H | 1.80994     | -2.43945 | 1.83759  | 1.27882     | -2.01371 | 1.71658  |
| H | 0.24004     | 1.48173  | -2.34174 | 1.79127     | 0.05668  | 0.83483  |
|   | Con f.1- 5c |          |          | Con f.1- 5d |          |          |
| C | -2.26964    | 1.56077  | 1.12723  | -3.52965    | -0.88318 | -0.10676 |
| C | -1.8285     | 2.93396  | 0.6408   | -3.99663    | 0.55348  | 0.00568  |
| C | -0.83123    | 2.84411  | -0.52926 | -3.00863    | 1.55958  | -0.62656 |
| C | 0.43557     | 2.0467   | -0.20469 | -1.90325    | 1.98788  | 0.34287  |
| C | -3.29791    | -1.53571 | -0.59853 | -0.83744    | -2.97142 | 1.23992  |
| C | -3.57603    | -0.58545 | 0.58014  | -2.35654    | -2.89109 | 0.96463  |
| C | -3.06603    | 0.81063  | 0.35116  | -2.88889    | -1.48591 | 0.90879  |
| C | -0.87149    | -1.66344 | 0.00631  | 1.02103     | -1.49587 | 0.53879  |
| C | 0.7389      | 0.55118  | -2.25545 | 0.34486     | 1.85493  | -0.85551 |
| C | 1.57278     | -0.72888 | -1.98312 | 1.34114     | 1.61696  | 0.30582  |
| C | 1.58216     | -1.19481 | -0.56081 | 2.37034     | 0.57453  | 0.02745  |
| C | 0.54353     | -2.16285 | -0.03758 | 1.97027     | -0.81628 | -0.40116 |
| C | -1.87981    | -2.03157 | -0.79651 | 0.03529     | -2.33529 | 0.18141  |
| C | 1.21952     | 1.75017  | -1.46698 | -0.79146    | 2.72656  | -0.38026 |
| C | -1.703      | 1.13394  | 2.45635  | -3.84593    | -1.5292  | -1.43225 |
| C | 2.46687     | -0.9245  | 0.41872  | 3.70955     | 0.63792  | 0.14797  |
| C | 2.07037     | -1.68604 | 1.61252  | 4.25704     | -0.69137 | -0.16359 |
| O | 0.95865     | -2.42187 | 1.33632  | 3.2408      | -1.54416 | -0.46861 |
| C | 3.69587     | -0.07657 | 0.43826  | 4.61217     | 1.76038  | 0.54017  |
| C | 2.26271     | 2.49174  | -1.84862 | -0.80579    | 4.05212  | -0.5436  |
| O | 2.60346     | -1.72677 | 2.71045  | 5.42155     | -1.06015 | -0.16921 |
| C | -1.72748    | -2.96489 | -1.96969 | -0.2538     | -2.73848 | -1.24081 |
| O | 1.16926     | 2.80521  | 0.7621   | -2.53932    | 2.78586  | 1.34995  |
| H | -2.69583    | 3.51502  | 0.30353  | -4.96771    | 0.65291  | -0.49639 |
| H | -1.37428    | 3.49465  | 1.46547  | -4.15274    | 0.82752  | 1.05468  |
| H | -0.525      | 3.84846  | -0.85057 | -3.53318    | 2.47104  | -0.93986 |
| H | -1.33106    | 2.37219  | -1.38218 | -2.55571    | 1.12834  | -1.52668 |
| H | 0.13934     | 1.08605  | 0.23559  | -1.47717    | 1.08515  | 0.80612  |
| H | -3.63545    | -1.06128 | -1.53279 | -0.57166    | -4.03712 | 1.30772  |
| H | -3.93396    | -2.42655 | -0.48876 | -0.61543    | -2.52584 | 2.21674  |
| H | -3.18226    | -1.01594 | 1.5065   | -2.85744    | -3.43122 | 1.78119  |
| H | -4.66849    | -0.54463 | 0.70237  | -2.58992    | -3.44024 | 0.04836  |
| H | -3.40082    | 1.25191  | -0.59127 | -2.73861    | -0.90567 | 1.82171  |
| H | -1.04229    | -0.94407 | 0.79893  | 1.17862     | -1.28046 | 1.59441  |
| H | 0.80474     | 0.75501  | -3.32956 | 0.87156     | 2.31771  | -1.69643 |
| H | -0.31211    | 0.34561  | -2.02739 | -0.04956    | 0.8919   | -1.20259 |
| H | 1.17534     | -1.53295 | -2.61437 | 1.82019     | 2.56482  | 0.56714  |
| H | 2.60328     | -0.54082 | -2.30158 | 0.77344     | 1.29411  | 1.19025  |
| H | 0.62492     | -3.11364 | -0.57343 | 1.58045     | -0.80258 | -1.42232 |
| H | -2.07949    | 1.78416  | 3.25902  | -3.46053    | -0.9223  | -2.2627  |
| H | -1.9453     | 0.1018   | 2.72257  | -3.44096    | -2.53759 | -1.53857 |
| H | -0.61016    | 1.24368  | 2.46147  | -4.93441    | -1.5874  | -1.57388 |
| H | 4.57283     | -0.68103 | 0.70214  | 4.05727     | 2.68793  | 0.70224  |
| H | 3.872       | 0.40114  | -0.52735 | 5.15529     | 1.51796  | 1.4622   |
| H | 3.61429     | 0.70887  | 1.19996  | 5.36573     | 1.93813  | -0.23692 |
| H | 2.8052      | 2.28287  | -2.76848 | -0.00925    | 4.56762  | -1.07582 |
| H | 2.61279     | 3.32766  | -1.24892 | -1.60918    | 4.66503  | -0.14327 |
| H | -0.73999    | -3.42814 | -2.03457 | -1.14491    | -2.22343 | -1.61768 |
| H | -2.48101    | -3.76221 | -1.93152 | 0.57278     | -2.52558 | -1.92223 |
| H | -1.89691    | -2.41752 | -2.90718 | -0.46321    | -3.81388 | -1.29346 |
| H | 1.95576     | 2.28608  | 1.00008  | -1.85017    | 3.05317  | 1.98103  |
|   | Con f.1- 5e |          |          |             |          |          |

|   |          |          |          |
|---|----------|----------|----------|
| C | -3.34498 | -0.71957 | 0.23105  |
| C | -3.33431 | 0.78724  | 0.35696  |
| C | -2.541   | 1.435    | -0.80012 |
| C | -1.8991  | 2.76435  | -0.41393 |
| C | -0.83988 | -3.22547 | 1.07285  |
| C | -2.36074 | -2.93882 | 1.04897  |
| C | -2.63303 | -1.46292 | 1.09273  |
| C | 0.96052  | -1.72957 | 0.28696  |
| C | 0.1074   | 1.51874  | 0.72581  |
| C | 1.02478  | 1.45337  | -0.52141 |
| C | 2.11252  | 0.43805  | -0.37586 |
| C | 1.89791  | -1.03319 | -0.65445 |
| C | -0.05911 | -2.54373 | -0.03074 |
| C | -0.8896  | 2.65597  | 0.71815  |
| C | -4.12063 | -1.26115 | -0.94177 |
| C | 3.39246  | 0.63724  | -0.00726 |
| C | 4.09323  | -0.65326 | -0.06627 |
| O | 3.22737  | -1.62255 | -0.46978 |
| C | 4.11299  | 1.88233  | 0.39117  |
| C | -0.90623 | 3.56703  | 1.69793  |
| O | 5.26411  | -0.90466 | 0.17479  |
| C | -0.50693 | -2.85676 | -1.43259 |
| O | -1.27033 | 3.27045  | -1.61104 |
| H | -4.35671 | 1.18986  | 0.36366  |
| H | -2.87709 | 1.06497  | 1.31325  |
| H | -3.18888 | 1.60865  | -1.66627 |
| H | -1.75377 | 0.74842  | -1.13121 |
| H | -2.68566 | 3.46616  | -0.10068 |
| H | -0.69526 | -4.31237 | 0.98705  |
| H | -0.43309 | -2.92362 | 2.04503  |
| H | -2.80162 | -3.43757 | 1.92435  |
| H | -2.81185 | -3.40228 | 0.16699  |
| H | -2.1276  | -0.93623 | 1.90485  |
| H | 1.19775  | -1.56657 | 1.33749  |
| H | -0.42572 | 0.56507  | 0.81198  |
| H | 0.73602  | 1.60929  | 1.6182   |
| H | 0.42841  | 1.21855  | -1.40812 |
| H | 1.47228  | 2.4384   | -0.68677 |
| H | 1.62718  | -1.19114 | -1.70149 |
| H | -5.17156 | -0.9452  | -0.87881 |
| H | -3.73587 | -0.86165 | -1.88943 |
| H | -4.10237 | -2.35172 | -1.00399 |
| H | 3.46426  | 2.75996  | 0.33169  |
| H | 4.48411  | 1.79994  | 1.42049  |
| H | 4.98649  | 2.04888  | -0.25098 |
| H | -0.18874 | 3.54471  | 2.51575  |
| H | -1.64228 | 4.36864  | 1.71698  |
| H | -1.48984 | -2.41164 | -1.62979 |
| H | 0.18144  | -2.49259 | -2.19899 |
| H | -0.62027 | -3.94089 | -1.56163 |
| H | -0.83664 | 4.10672  | -1.3703  |

## 5 The 1D and 2D NMR spectra of 1–5

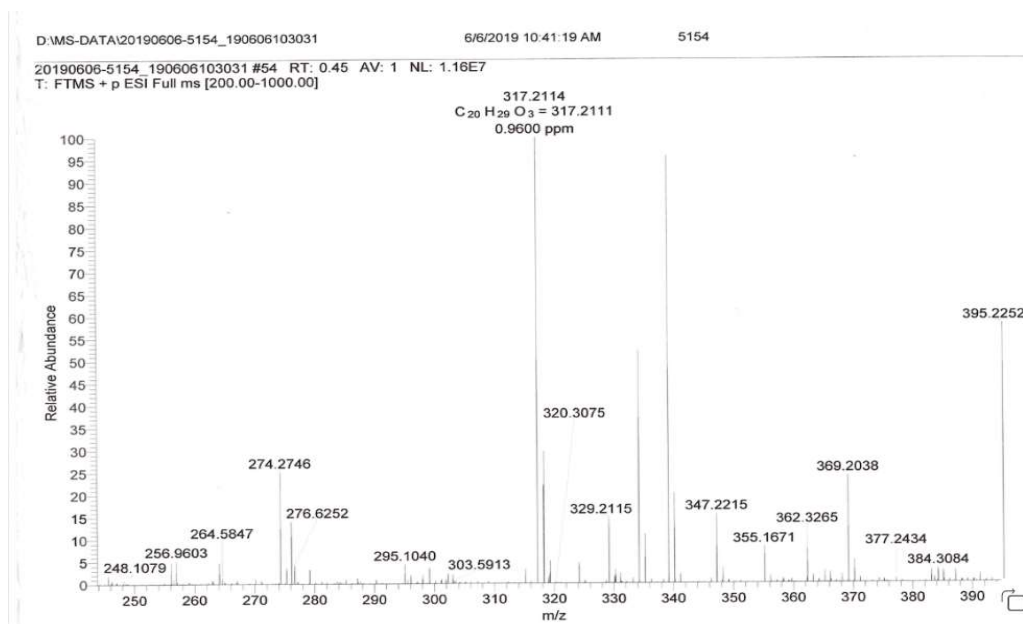

Figure S10. The positive HRESIMS spectrum of compound **1**.

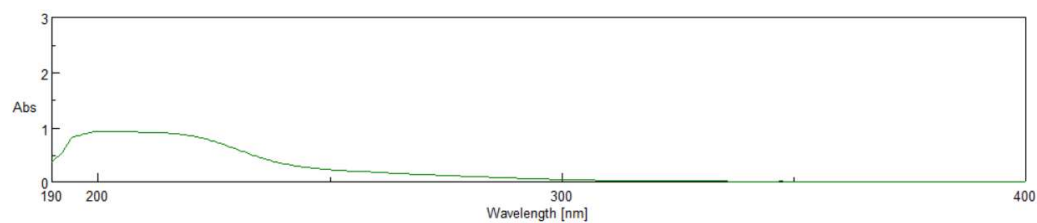

Figure S11. UV spectrum of compound **1**.

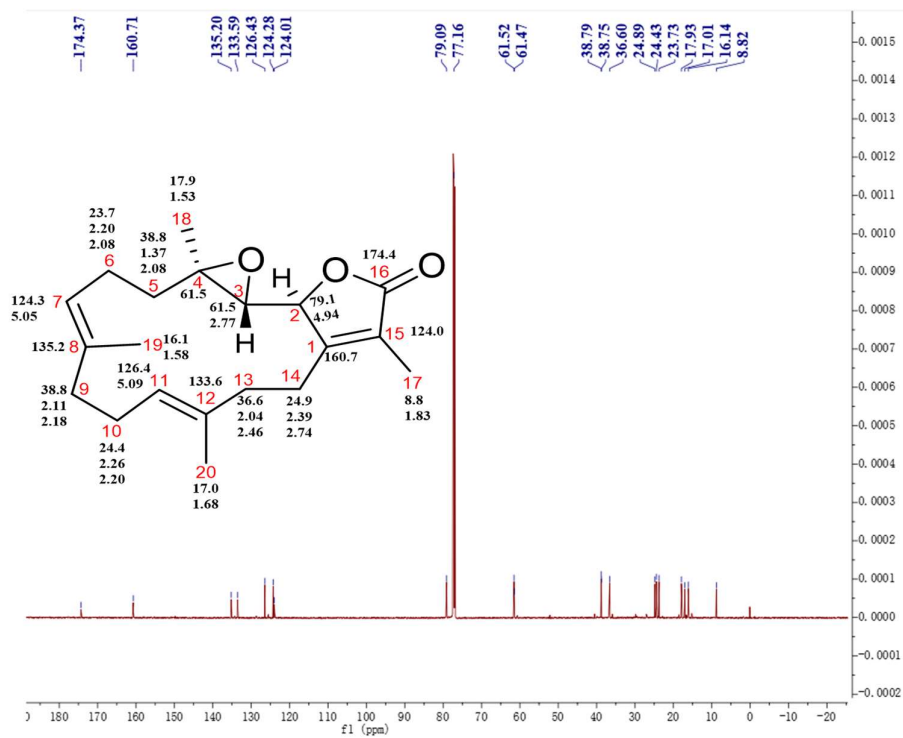

**Figure S12.**  $^1\text{H}$  NMR spectrum (600 MHz,  $\text{CDCl}_3$ ) of compound **1**.

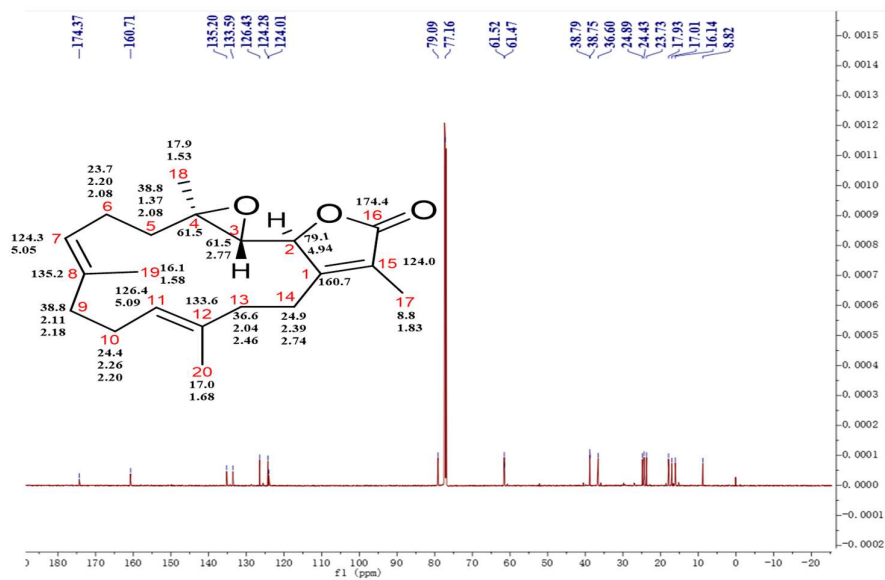

**Figure S13.**  $^{13}\text{C}$  NMR spectrum 150 MHz,  $\text{CDCl}_3$ ) of compound **1**.

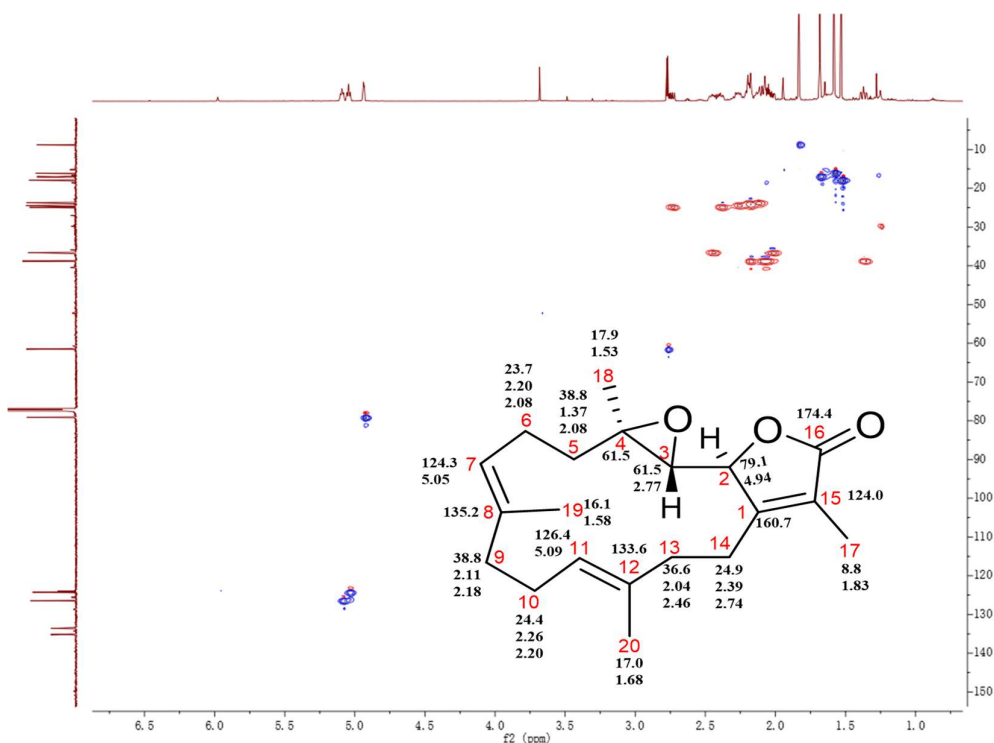

Figure S14. HSQC (600 MHz,  $\text{CDCl}_3$ ) of compound 1.

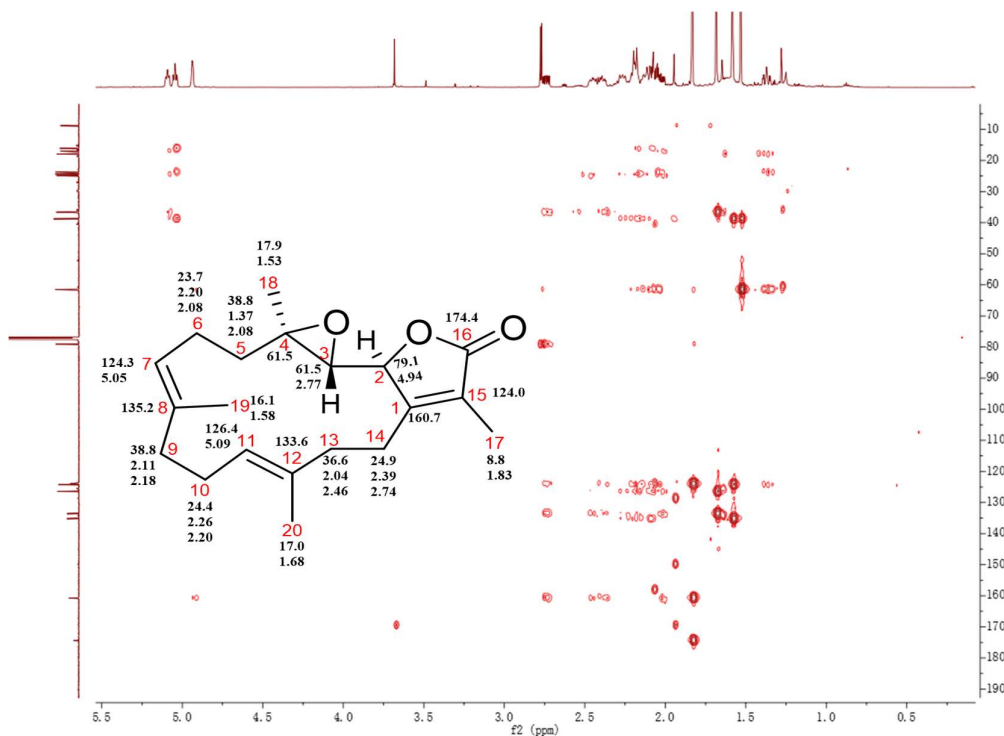

Figure S15. HMBC (150 MHz,  $\text{CDCl}_3$ ) of compound 1.

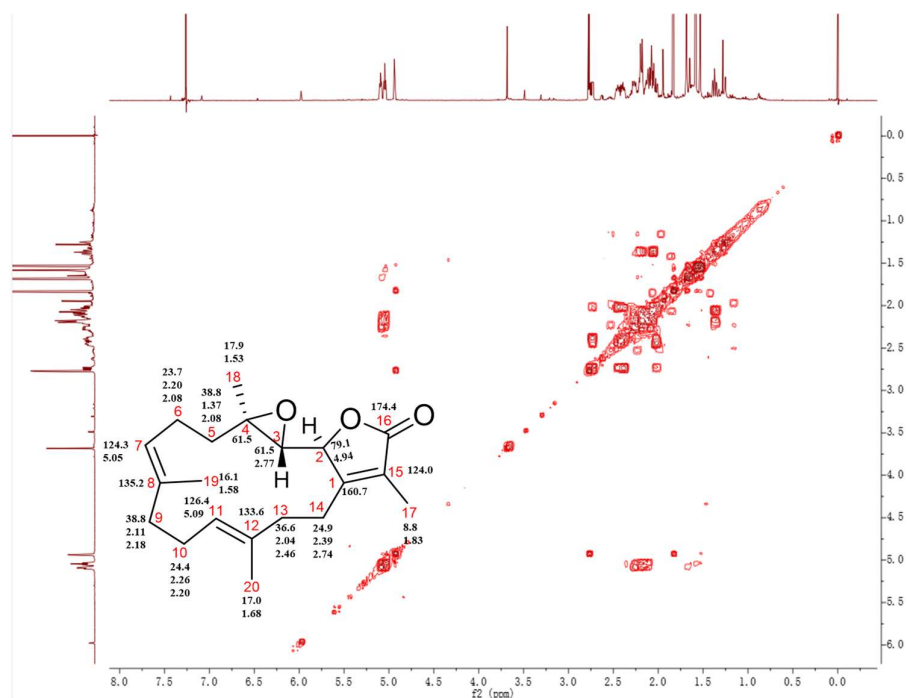

Figure S16.  $^1\text{H}$ - $^1\text{H}$  COSY (600 MHz,  $\text{CDCl}_3$ ) of compound 1.

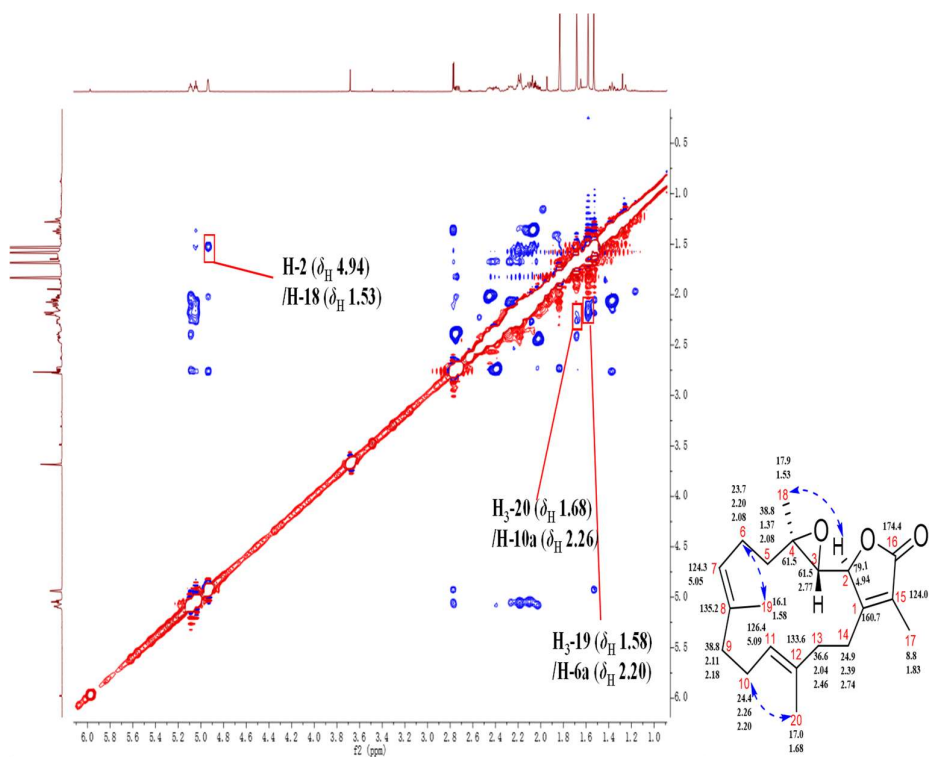

Figure S17. NOESY (600 MHz,  $\text{CDCl}_3$ ) of compound 1.

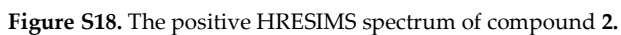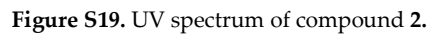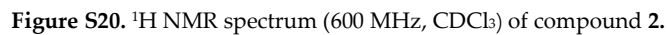

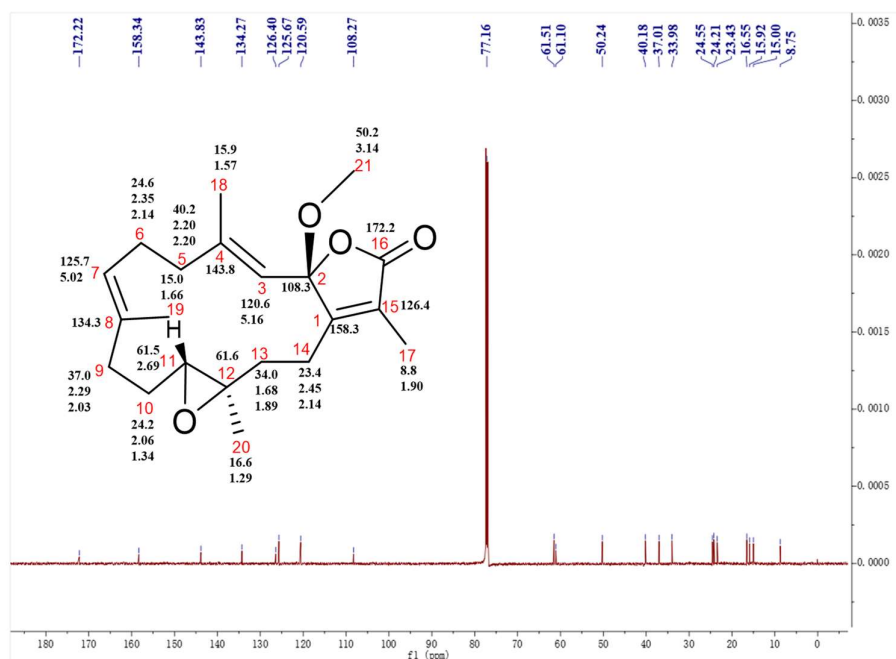

Figure S21.  $^{13}\text{C}$  NMR spectrum (150 MHz,  $\text{CDCl}_3$ ) of compound 2.

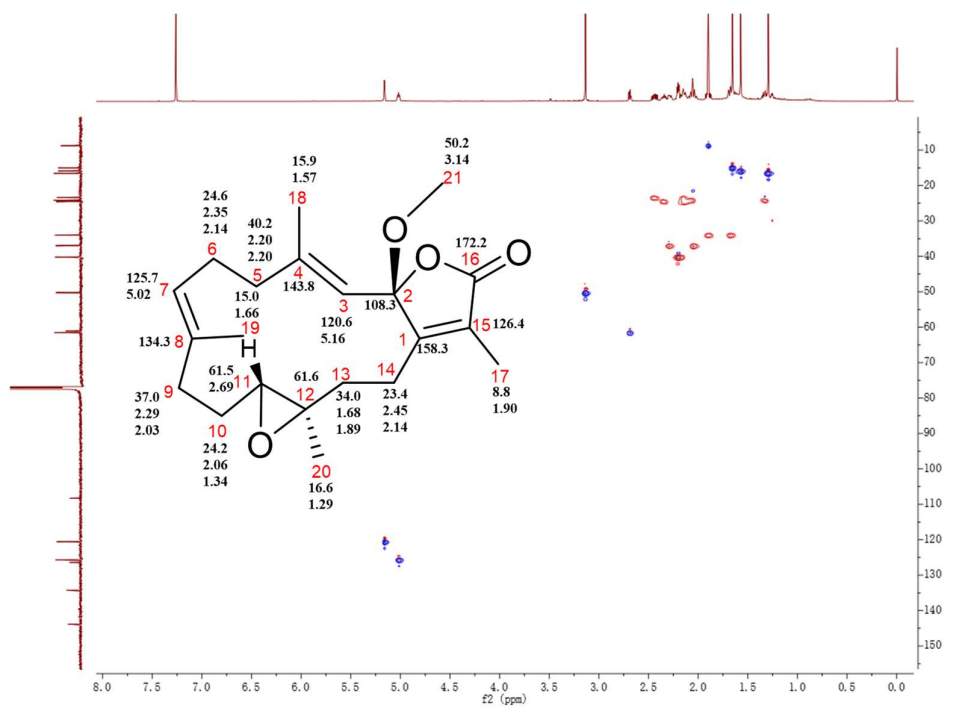

Figure S22. HSQC (600 MHz,  $\text{CDCl}_3$ ) of compound 2.

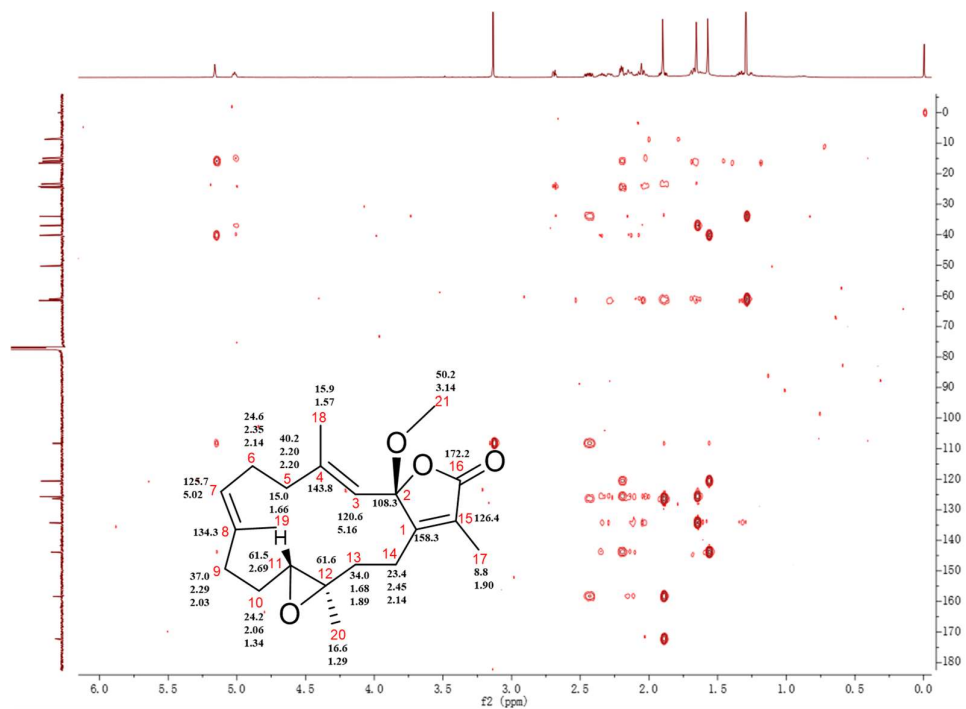

Figure S23. HMBC (150 MHz,  $\text{CDCl}_3$ ) of compound 2.

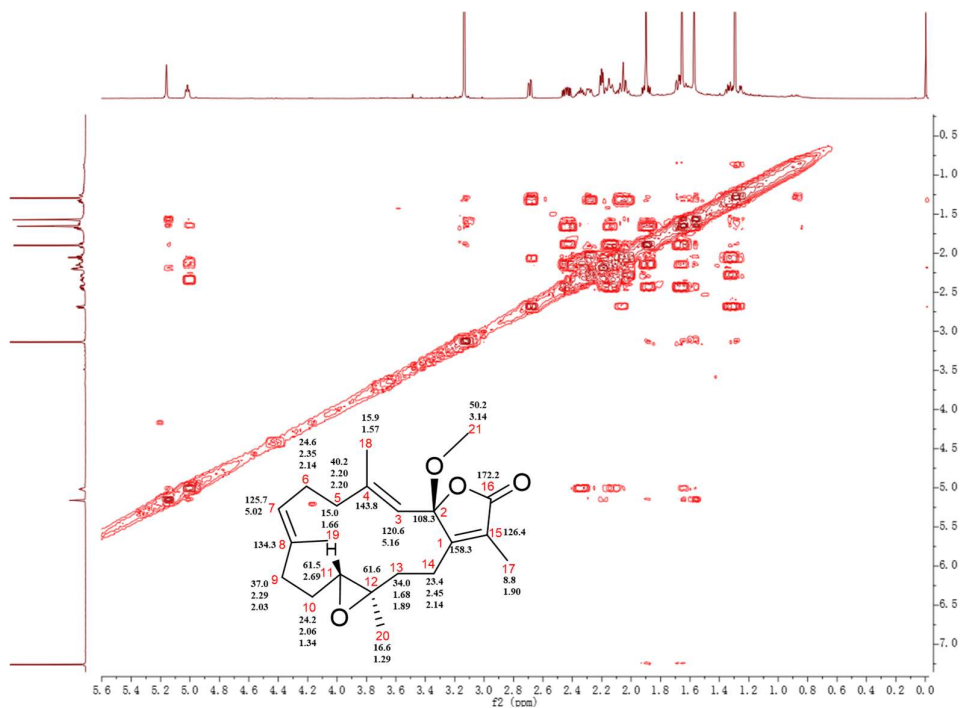

Figure S24.  $^1\text{H}$ - $^1\text{H}$  COSY (600 MHz,  $\text{CDCl}_3$ ) of compound 2.

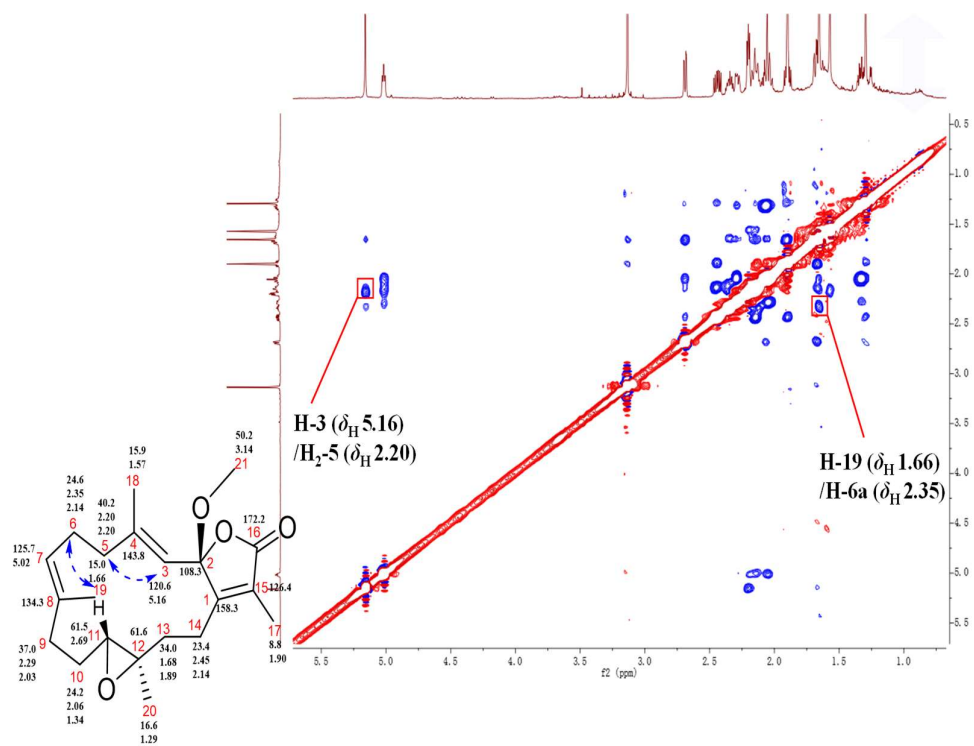

Figure S25. NOESY (600 MHz,  $\text{CDCl}_3$ ) of compound 2.

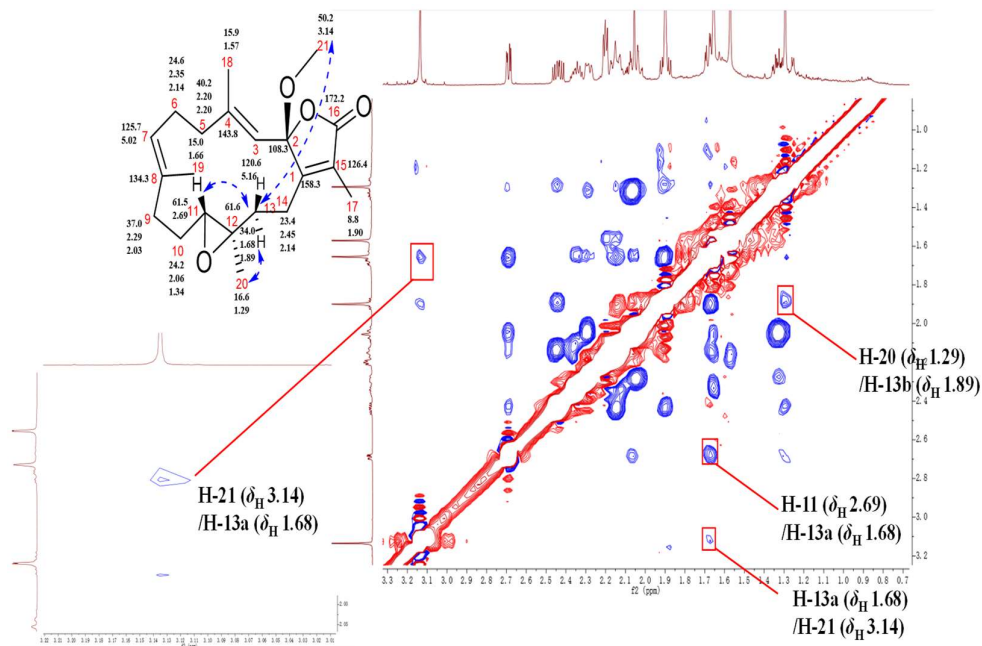

Figure S26 NOESY (500 MHz,  $\text{CDCl}_3$ ) of compound 2

20211215-7452\_211213081116 #50 RT: 0.45 AV: 1 SB: 11 0.05-0.14 NL: 7.44E6  
T: FTMS + p ESI Full ms [150.00-1000.00]

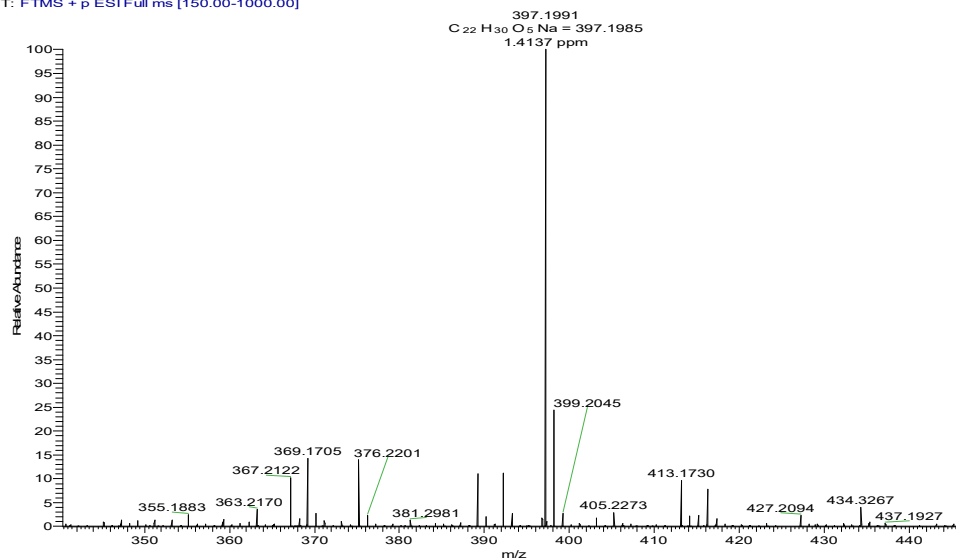

Figure S27. The positive HRESIMS spectrum of compound 3

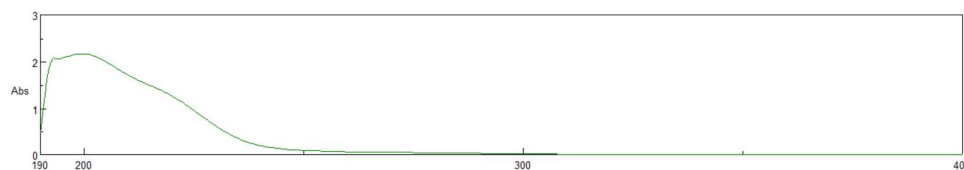

Figure S28. UV spectrum of compound 3

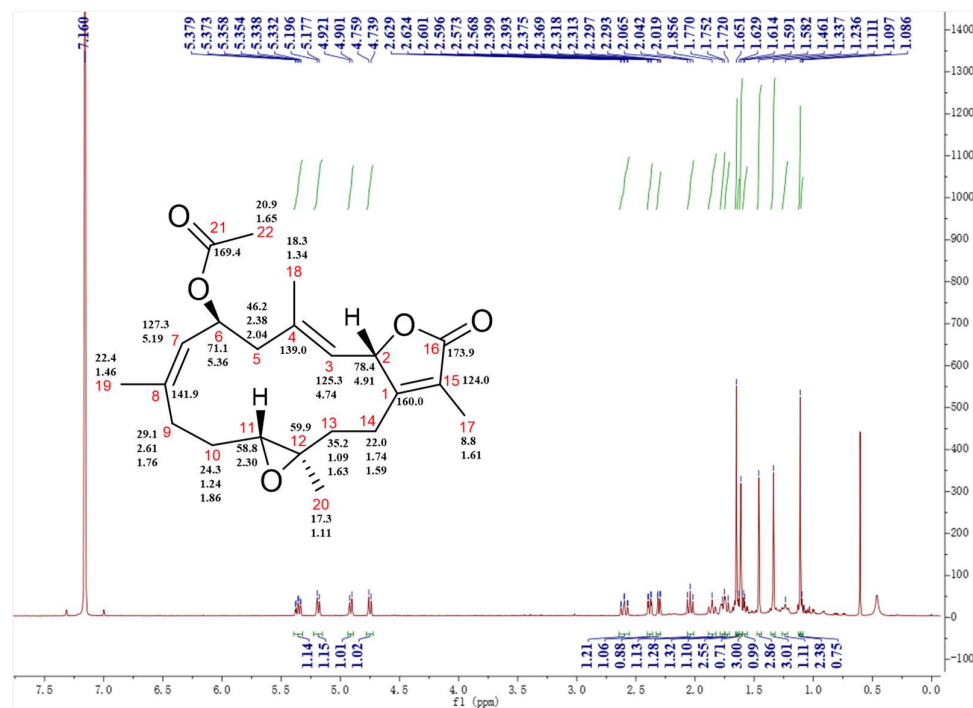

Figure S29. <sup>1</sup>H NMR spectrum (500 MHz, C<sub>6</sub>D<sub>6</sub>) of compound 3

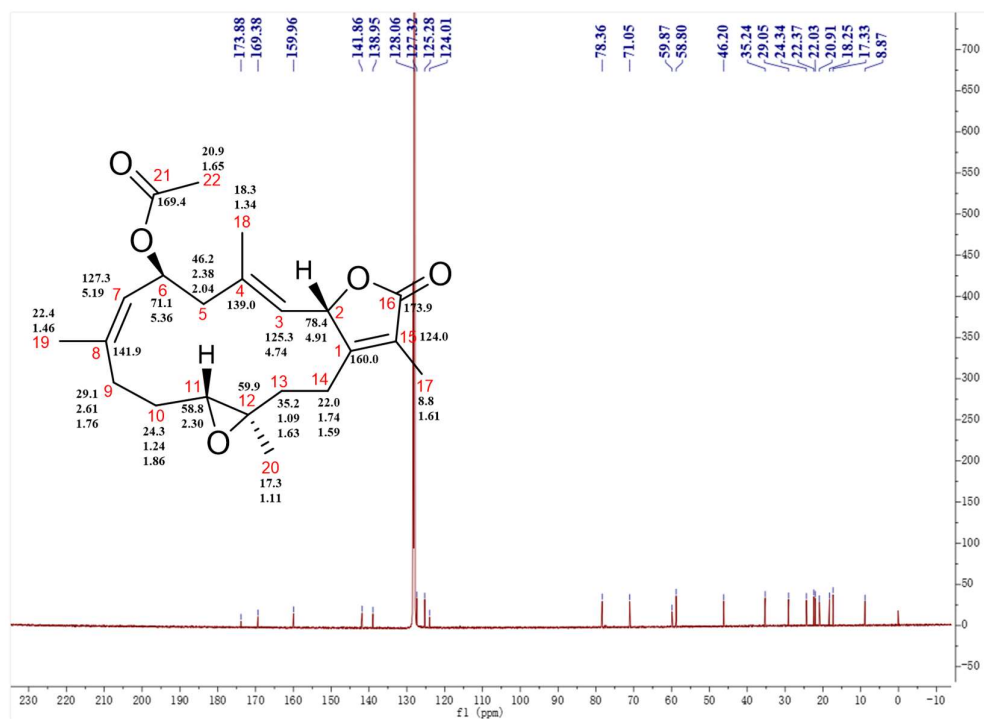

Figure S30.  $^{13}\text{C}$  NMR spectrum (125 MHz,  $\text{C}_6\text{D}_6$ ) of compound 3

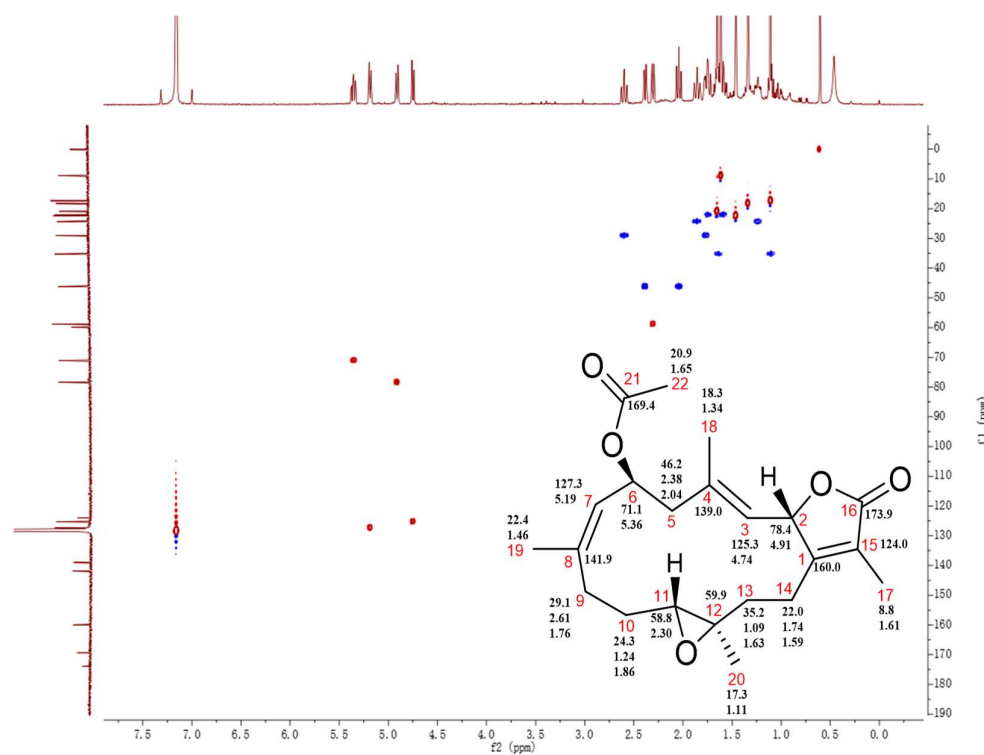

Figure S31. HSQC (500 M Hz,  $\text{C}_6\text{D}_6$ ) of compound 3

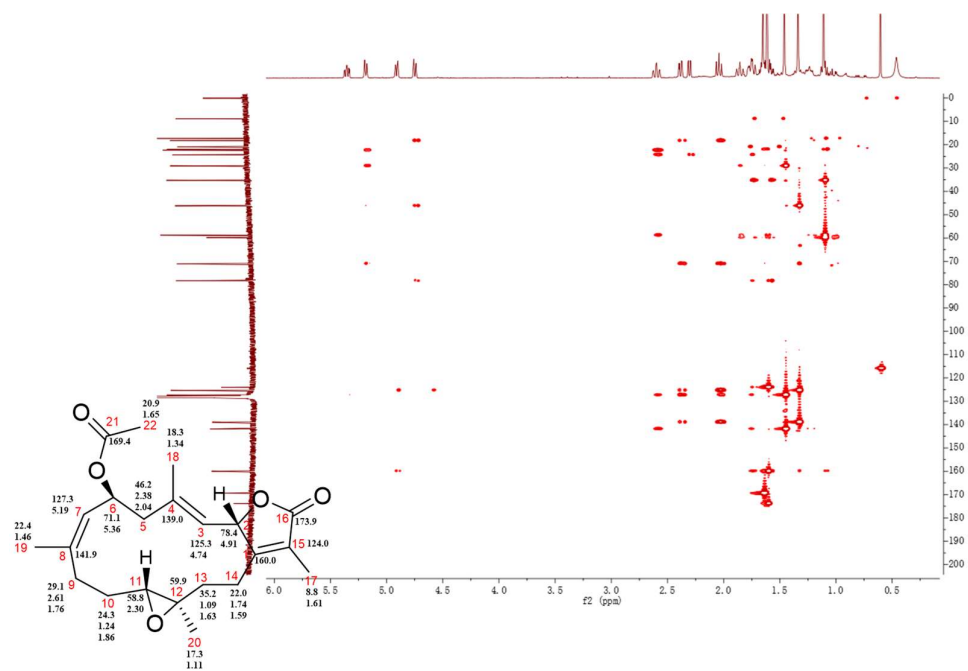

Figure S32. HMBC (125 MHz,  $\text{C}_6\text{D}_6$ ) of compound 3.

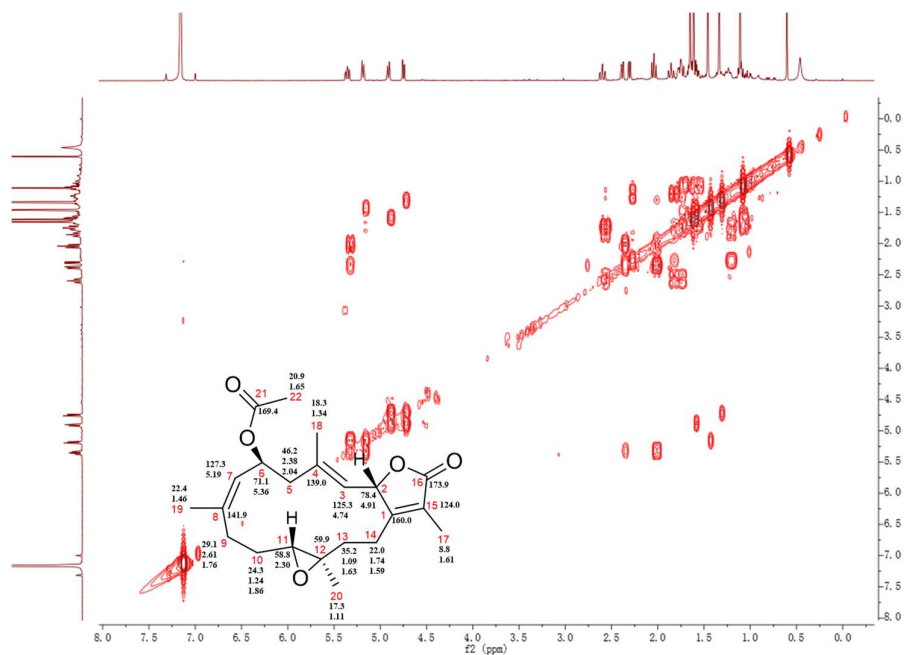

Figure S33.  $^1\text{H}$ - $^1\text{H}$  COSY (500 MHz,  $\text{C}_6\text{D}_6$ ) of compound 3.

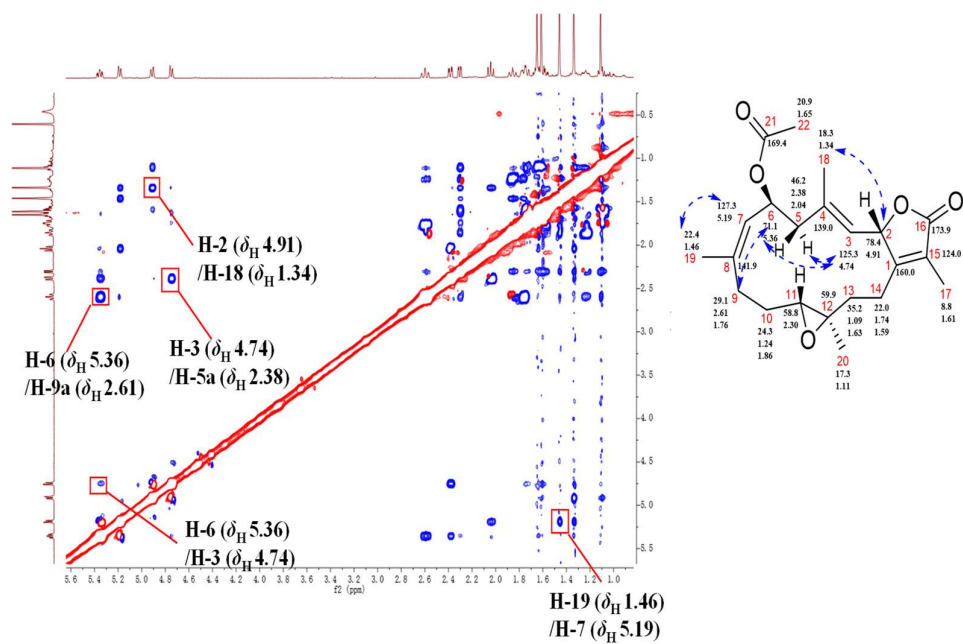

Figure S34. NOESY (500 MHz, C<sub>6</sub>D<sub>6</sub>) of compound 3.

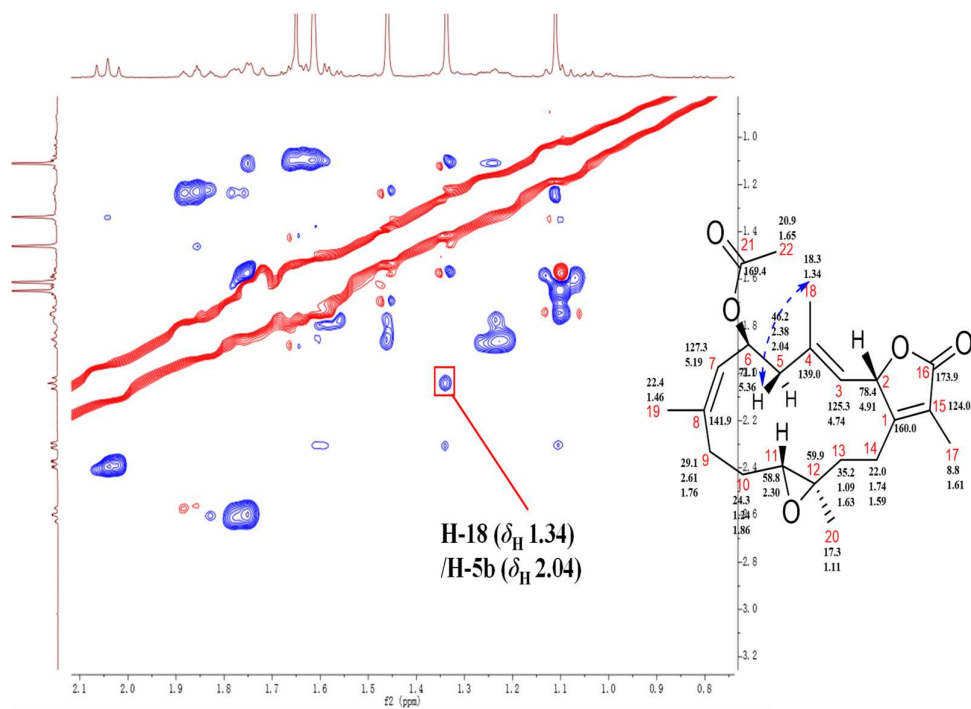

Figure S35. NOESY (500 MHz, C<sub>6</sub>D<sub>6</sub>) of compound 3.

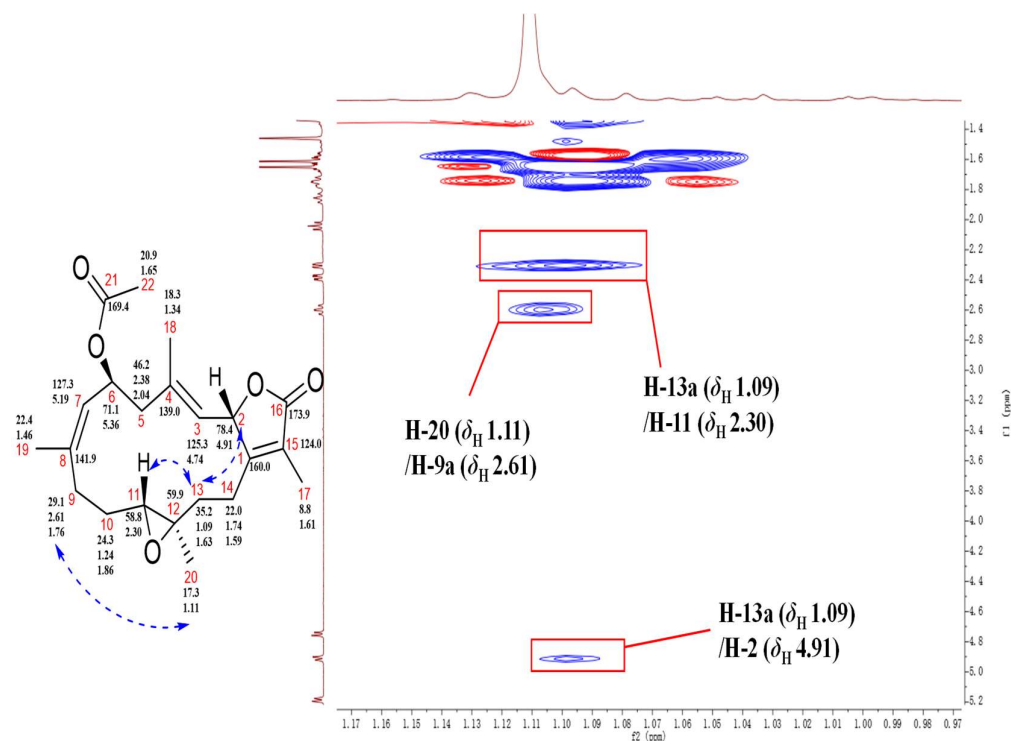

Figure S36. NOESY (500 MHz,  $\text{C}_6\text{D}_6$ ) of compound 3.

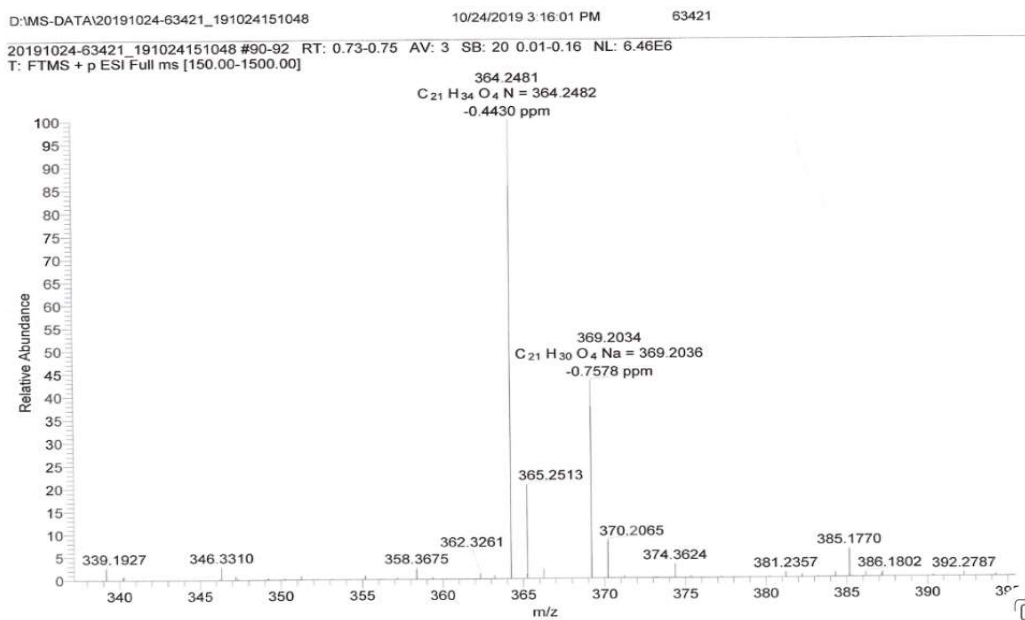

Figure S37. The positive HRESIMS spectrum of compound 4.

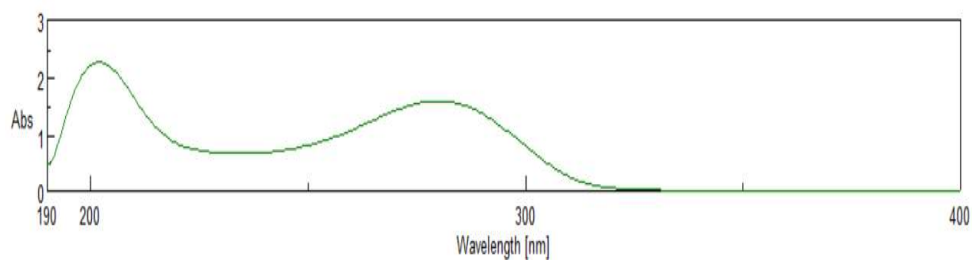

Figure S38. UV spectrum of compound 4.

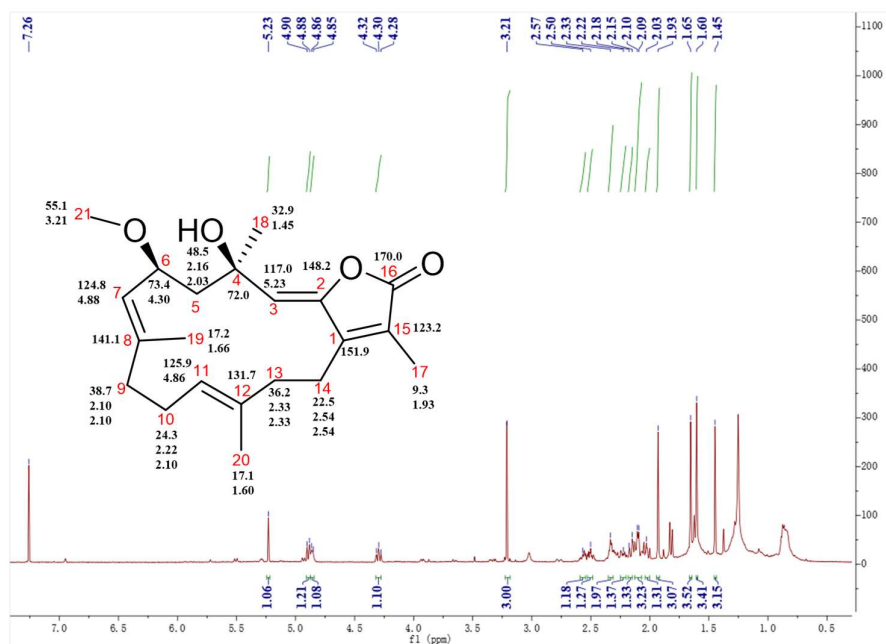

Figure S39. <sup>1</sup>H NMR spectrum (500 MHz, CDCl<sub>3</sub>) of compound 4.

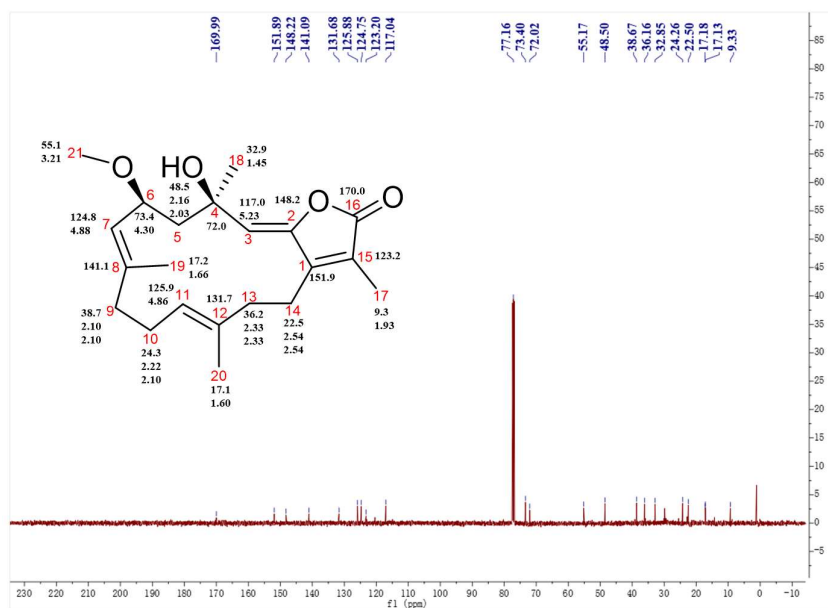

Figure S40. <sup>13</sup>C NMR spectrum 125 MHz, CDCl<sub>3</sub>) of compound 4.

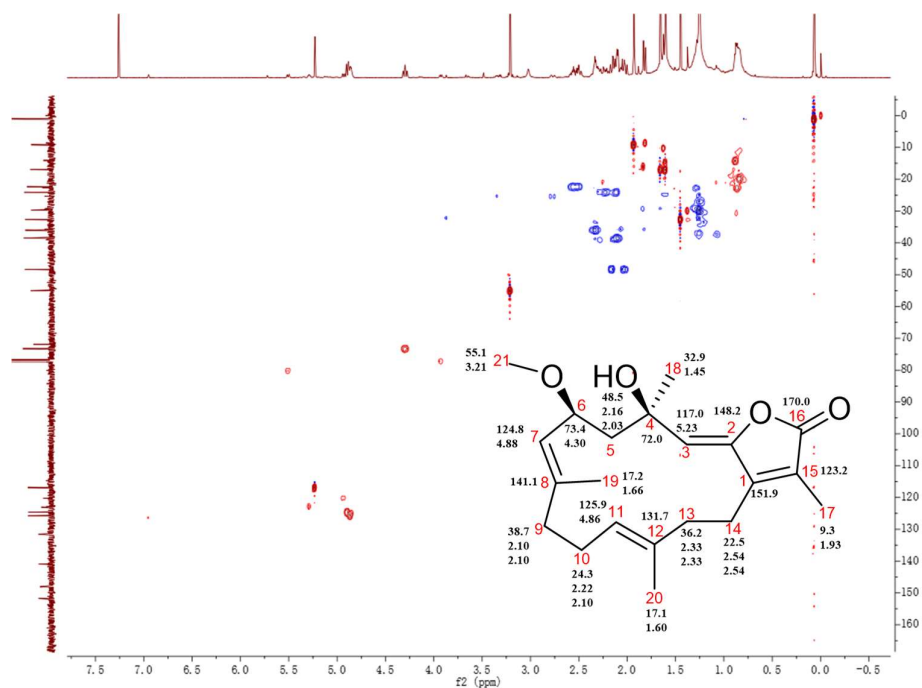

Figure S41. HSQC (500 MHz, CDCl<sub>3</sub>) of compound 4.

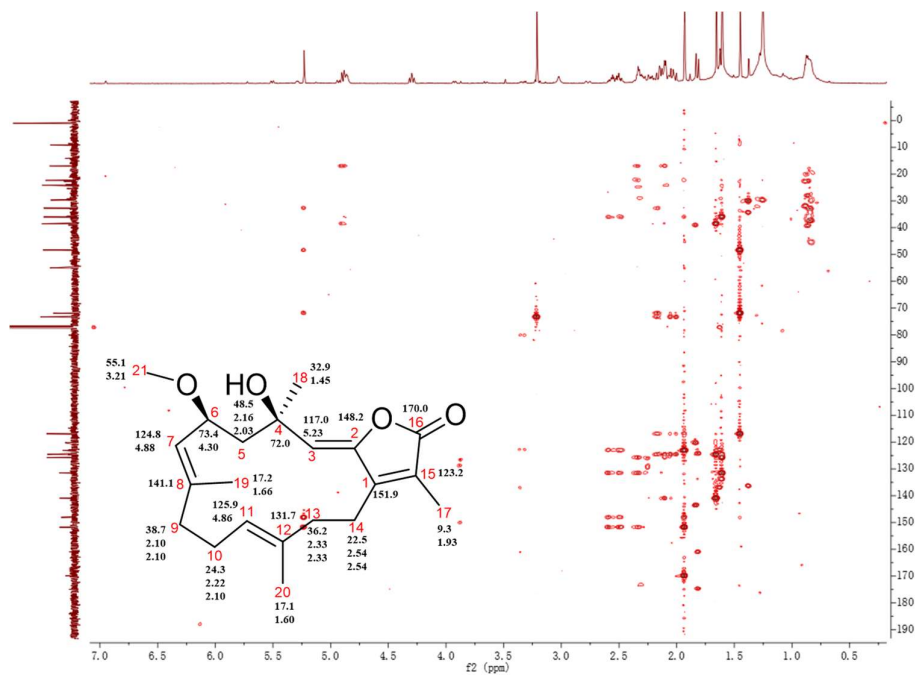

Figure S42. HMBC (125 MHz, CDCl<sub>3</sub>) of compound 4.

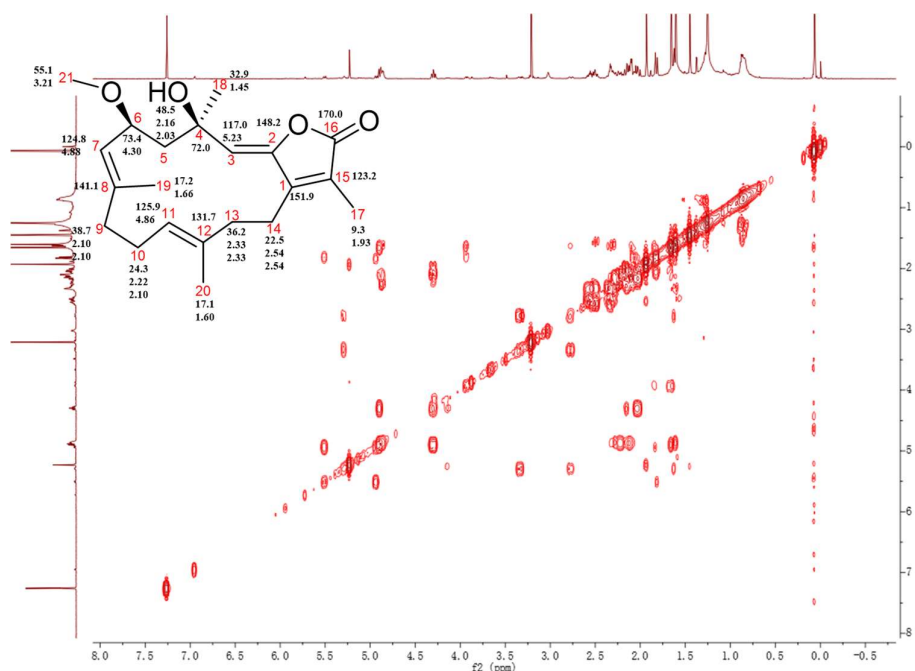

Figure S43.  $^1\text{H}$ - $^1\text{H}$  COSY (500 MHz,  $\text{CDCl}_3$ ) of compound 4.

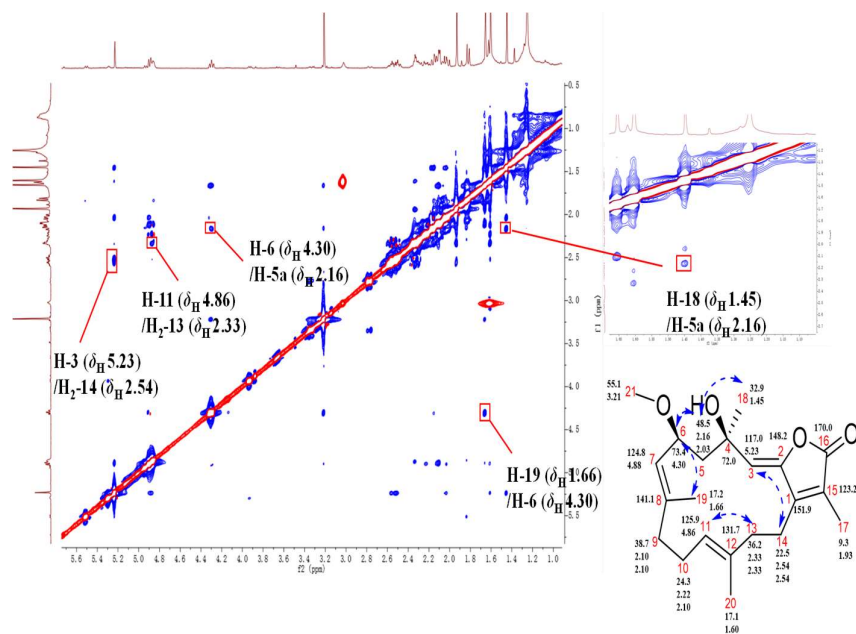

Figure S44. NOESY (500 MHz,  $\text{CDCl}_3$ ) of compound 4.

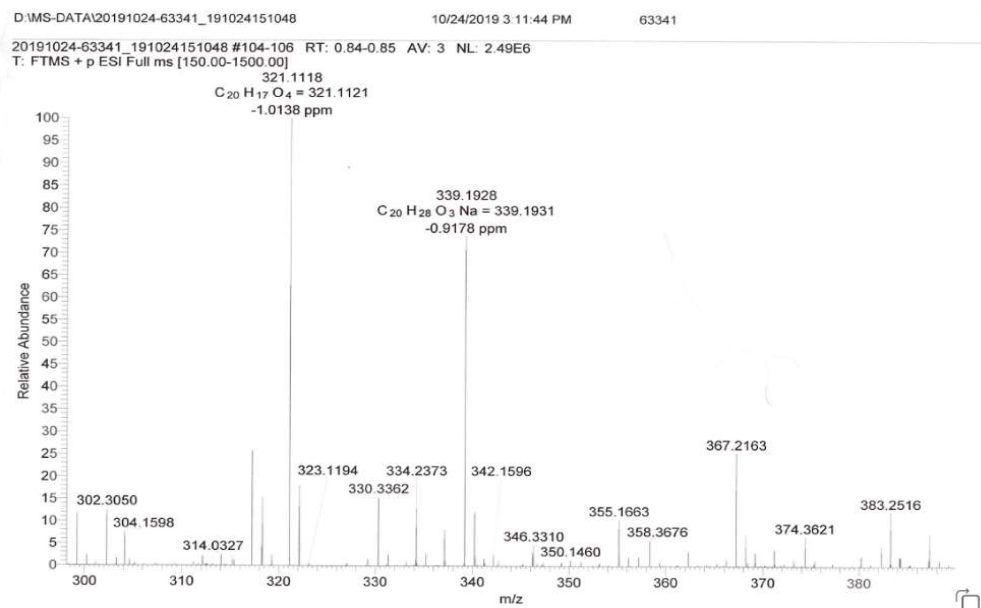

Figure S45. The positive HRESIMS spectrum of compound 5.

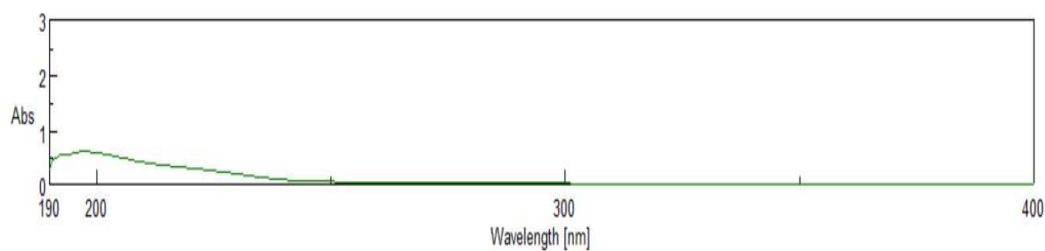

Figure 46. UV spectrum of compound 5.

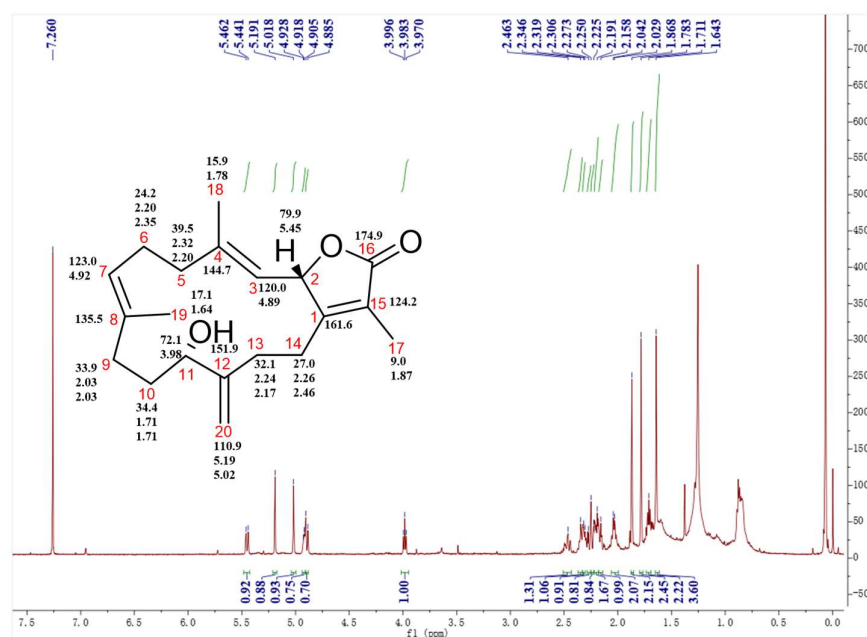

Figure S47. <sup>1</sup>H NMR spectrum (500 MHz, CDCl<sub>3</sub>) of compound 5.

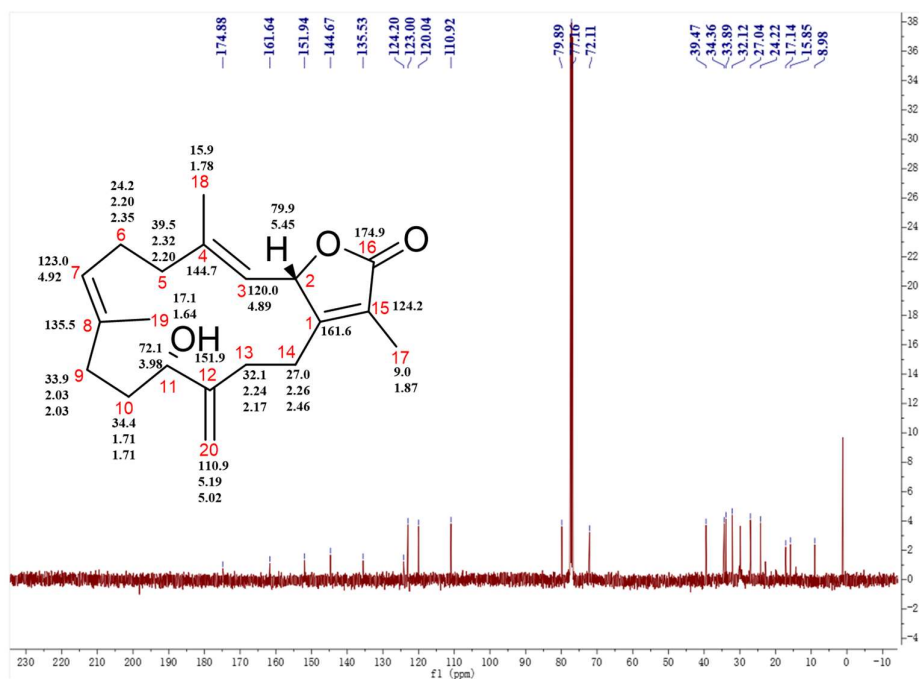

Figure S48.  $^{13}\text{C}$  NMR spectrum (125 MHz,  $\text{CDCl}_3$ ) of compound 5.

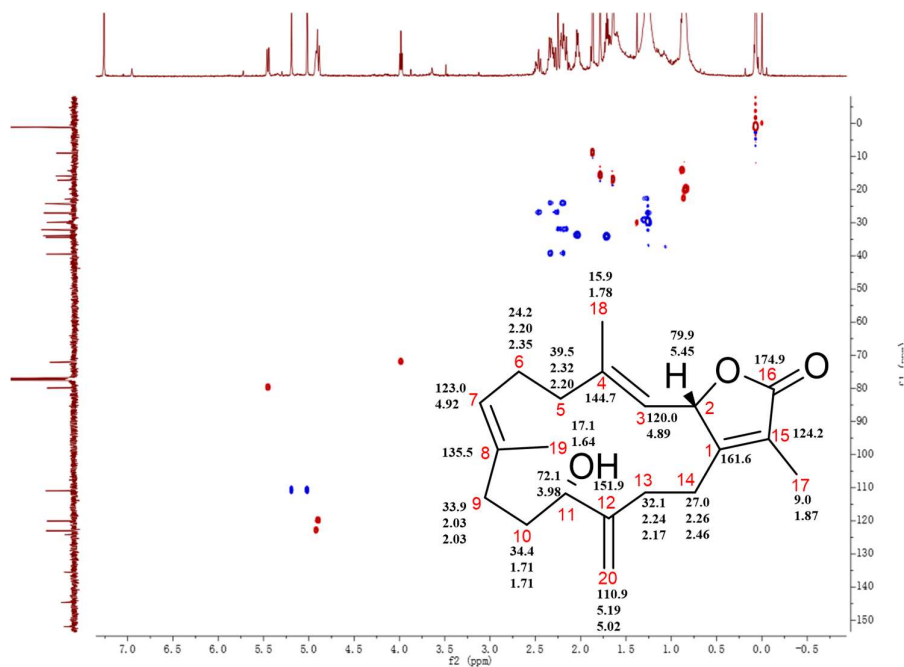

Figure S49. HSQC (500 MHz,  $\text{CDCl}_3$ ) of compound 5.

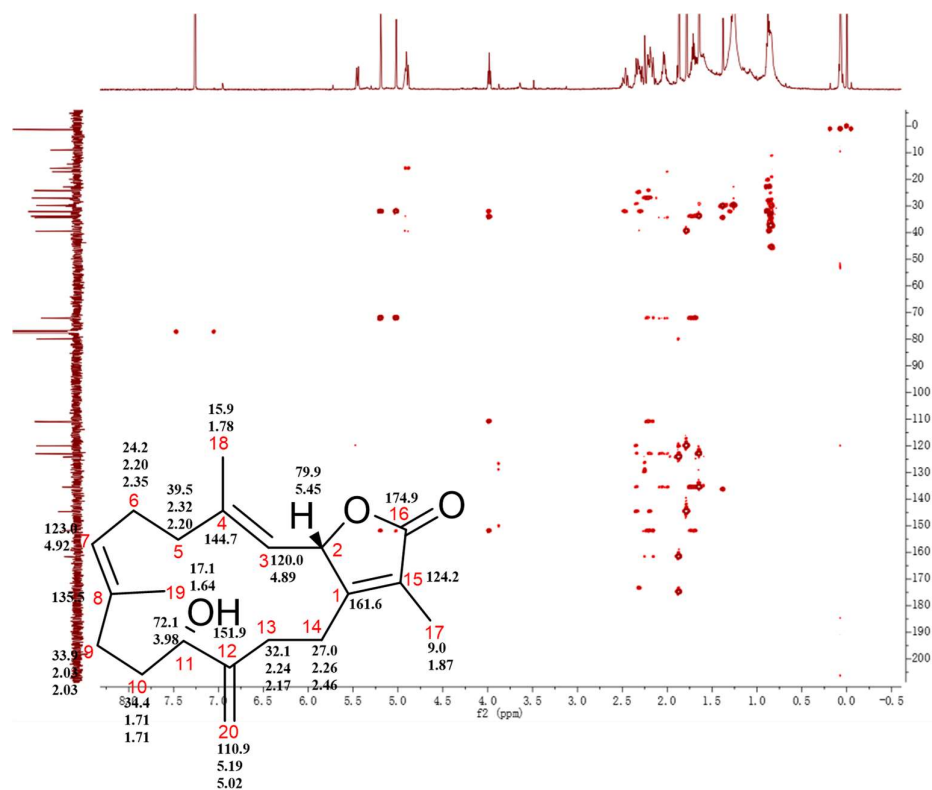

Figure S50. HMBC (125 MHz, CDCl<sub>3</sub>) of compound 5.

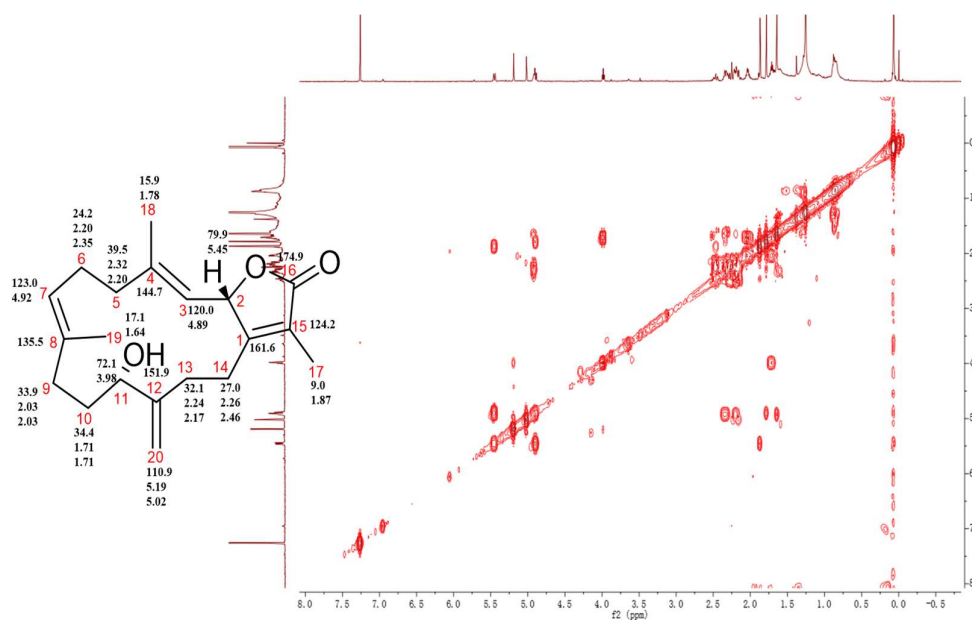

Figure S51. <sup>1</sup>H-<sup>1</sup>H COSY (500 MHz, CDCl<sub>3</sub>) of compound 5.

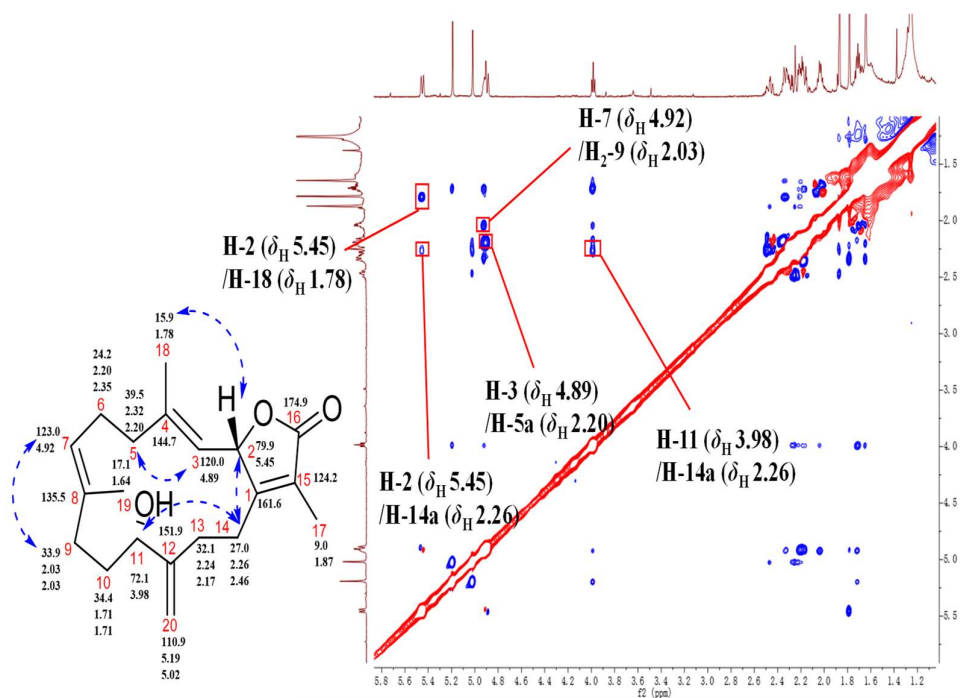

Figure S52. NOESY (500 MHz, CDCl<sub>3</sub>) of compound 5.

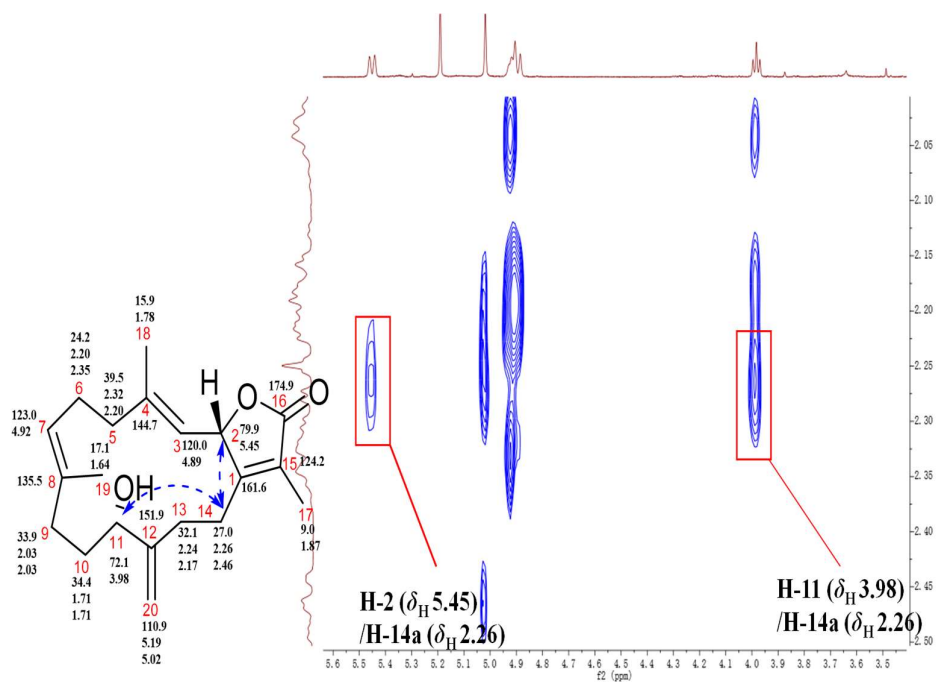

Figure S53. NOESY (500 MHz, CDCl<sub>3</sub>) of compound 5.
